# Supplementary material for: The silent epidemic of obesity in The Gambia: evidence from a nationwide, population-based, cross-sectional health examination survey
Source: PubMed Central journal article supplement — BMJ Open. 2020 Jun 1;10(6):e033882. doi: 10.1136/bmjopen-2019-033882 (PMC7265034; doi:10.1136/bmjopen-2019-033882), 2020-06-01
Supplement: bmjopen-2019-033882.draft_revisions.pdf [file bmjopen-2019-033882.draft_revisions.pdf]

# BMJ Open

BMJ Open is committed to open peer review. As part of this commitment we make the peer review history of every article we publish publicly available.

When an article is published we post the peer reviewers' comments and the authors' responses online. We also post the versions of the paper that were used during peer review. These are the versions that the peer review comments apply to.

The versions of the paper that follow are the versions that were submitted during the peer review process. They are not the versions of record or the final published versions. They should not be cited or distributed as the published version of this manuscript.

BMJ Open is an open access journal and the full, final, typeset and author-corrected version of record of the manuscript is available on our site with no access controls, subscription charges or pay-per-view fees (<http://bmjopen.bmj.com>).

If you have any questions on BMJ Open's open peer review process please email [info.bmjopen@bmj.com](mailto:info.bmjopen@bmj.com)

# BMJ Open

## The silent epidemic of obesity in The Gambia: Evidence from a nationwide population-based cross sectional health examination survey

|                               |                                                                                                                                                                                                                                                                                                                                                                                                                                                                                                               |
|-------------------------------|---------------------------------------------------------------------------------------------------------------------------------------------------------------------------------------------------------------------------------------------------------------------------------------------------------------------------------------------------------------------------------------------------------------------------------------------------------------------------------------------------------------|
| Journal:                      | <i>BMJ Open</i>                                                                                                                                                                                                                                                                                                                                                                                                                                                                                               |
| Manuscript ID                 | bmjopen-2019-033882                                                                                                                                                                                                                                                                                                                                                                                                                                                                                           |
| Article Type:                 | Original research                                                                                                                                                                                                                                                                                                                                                                                                                                                                                             |
| Date Submitted by the Author: | 28-Aug-2019                                                                                                                                                                                                                                                                                                                                                                                                                                                                                                   |
| Complete List of Authors:     | Cham, Bai; Medical Research Council The Gambia, Disease Control and Elimination; University of the Gambia, Public Health<br>Scholes, Shaun; UCL, Dept of Epidemiology and Public Health<br>Ng Fat , Linda; University College London Research Department of Epidemiology and Public Health,<br>Omar, Badjie; Ministry of Health, Non-Communicable Diseases Unit<br>Groce, Nora; University College London, Division of Epidemiology and Public Health<br>Mindell, Jennifer; UCL, Epidemiology & Public Health |
| Keywords:                     | Obesity, non-communicable diseases, sub-Saharan Africa, The Gambia, WHO STEP survey                                                                                                                                                                                                                                                                                                                                                                                                                           |
|                               |                                                                                                                                                                                                                                                                                                                                                                                                                                                                                                               |

SCHOLARONE™  
Manuscripts

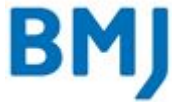

I, the Submitting Author has the right to grant and does grant on behalf of all authors of the Work (as defined in the below author licence), an exclusive licence and/or a non-exclusive licence for contributions from authors who are: i) UK Crown employees; ii) where BMJ has agreed a CC-BY licence shall apply, and/or iii) in accordance with the terms applicable for US Federal Government officers or employees acting as part of their official duties; on a worldwide, perpetual, irrevocable, royalty-free basis to BMJ Publishing Group Ltd ("BMJ") its licensees and where the relevant Journal is co-owned by BMJ to the co-owners of the Journal, to publish the Work in this journal and any other BMJ products and to exploit all rights, as set out in our [licence](#).

The Submitting Author accepts and understands that any supply made under these terms is made by BMJ to the Submitting Author unless you are acting as an employee on behalf of your employer or a postgraduate student of an affiliated institution which is paying any applicable article publishing charge ("APC") for Open Access articles. Where the Submitting Author wishes to make the Work available on an Open Access basis (and intends to pay the relevant APC), the terms of reuse of such Open Access shall be governed by a Creative Commons licence – details of these licences and which [Creative Commons](#) licence will apply to this Work are set out in our licence referred to above.

Other than as permitted in any relevant BMJ Author's Self Archiving Policies, I confirm this Work has not been accepted for publication elsewhere, is not being considered for publication elsewhere and does not duplicate material already published. I confirm all authors consent to publication of this Work and authorise the granting of this licence.

1  
2  
3 **The silent epidemic of obesity in The Gambia: Evidence from a nationwide**  
4 **population-based cross sectional health examination survey**  
5  
6  
7

8 Bai Cham,<sup>1,2,3\*</sup> Shaun Scholes<sup>3</sup>, Linda Ng Fat,<sup>3</sup> Omar Badjie,<sup>4</sup> Nora E Groce,<sup>3</sup> Jennifer S  
9 Mindell,<sup>3</sup>  
10

11 <sup>1</sup>Department of Public Health, University of The Gambia, Brikama Campus, The Gambia

12 <sup>2</sup>Medical Research Council Unit, The Gambia, Unit at the London School of Hygiene and  
13 Tropical Medicine

14 <sup>3</sup>Research Department of Epidemiology and Public Health, University College London,  
15 United Kingdom

16 <sup>4</sup>Non-Communicable Diseases Unit, Ministry of Health, The Gambia

17 \* Corresponding author: Medical Research Council Unit at the London School of Hygiene  
18 and Tropical Medicine, Atlantic Road Fajara, The Gambia

19 Email: [bacham@mrc.gm/](mailto:bacham@mrc.gm/) [barhamcham@hotmail.com](mailto:barhamcham@hotmail.com)  
20  
21  
22  
23  
24  
25  
26  
27  
28  
29  
30  
31  
32  
33  
34  
35  
36  
37  
38  
39  
40  
41  
42  
43  
44  
45  
46  
47  
48  
49  
50  
51  
52  
53  
54  
55  
56  
57  
58  
59  
60

## Abstract

### Objectives

Non-communicable diseases account for 70% of global deaths, with 80% occurring in low- and middle-income countries. The rapid increase of obesity in sub-Saharan Africa is a source of concern. We assessed generalised-and abdominal-obesity and associated risk factors for each among adults in The Gambia.

**Design:** Random nationwide cross sectional health examination survey using WHO STEPwise survey methods.

**Setting:** The study was conducted in The Gambia.

**Participants:** This study is based on secondary analysis of a nationally representative sample of adults aged 25-64 years (78% response rate) collected in 2010 using WHO STEPwise survey methods. Analysis was restricted to non-pregnant participants with valid weight and height measurements (n=3533).

### Primary and secondary outcome measures

The primary outcome variable was generalised obesity, defined using body mass index. Analyses were weighted for non-response and adjusted for the complex survey design. We conducted multinomial logistic regression analysis to identify factors associated with underweight, overweight and obesity. A secondary outcome variable was abdominal obesity defined using high waist circumference.

### Results

Two-fifths of adults were overweight/obese, with a higher obesity prevalence in women (17%, 95%CI: 14.7-19.7; men 8%, 6.0-11.0) and urban residents. 10% of men and 8% of women were underweight. Urban residence [adjusted relative risk ratio (ARRR) 5.8, CI 2.4-14.5], higher education (2.3, 1.2-4.5), older age, ethnicity, and low fruit and vegetable intake (2.8, 1.1-6.8), were strongly associated with obesity among men. Similarly, urban residence (4.7, 2.7-8.2), higher education (2.6, 1.1-6.4), older age and ethnicity were associated with obesity in women.

### Conclusion

There is a high burden of overweight/obesity in The Gambia. While obesity rates in rural areas was lower than urban areas, a rising rate of obesity in rural areas is also of concern. Preventive strategies should be directed at raising awareness, discouraging harmful beliefs on weight, and promotion of healthy diets and physical activity.

**Key words:** Obesity, non-communicable diseases, sub-Saharan Africa, The Gambia, WHO STEP survey, health examination survey

Word count: Abstract = 298; Main document =3271

### Strengths and limitations of this study

- Our study uses the most recent nationally-representative data on generalised and abdominal obesity among adults in The Gambia and hence it serves as a baseline study from which future changes in prevalence and risk factors can be assessed.
- The complex sampling strategy and the stringent WHO STEP protocols applied in collecting the data, particularly the use of objective anthropometric measurements taken by trained field staff, minimised biases.
- The study has identified population sub-groups to prioritise with health promotion measures.
- Our main limitation is that the survey did not collect self-reported measures on beliefs about body size and weight management, which are important in The Gambian context to assess and monitor trends on beliefs and practices.

## Introduction

Non-communicable diseases (NCDs) are increasing in sub-Saharan Africa (SSA).<sup>1 2</sup>

NCDs account for 70% of global deaths; 80% occur in low- and middle-income countries.<sup>2</sup>

A pooled analysis of 1698 population-based measurement studies comprising 19 million participants from 200 countries revealed an increasing trend of obesity globally.<sup>3</sup> If these

trends continue, meeting the WHO global NCD target of halting the rise of obesity by

2025 is almost impossible. A great concern is the rapid increase of obesity in SSA.

Countries in SSA face the challenge of the double burden of communicable and non-communicable diseases, namely that of underweight/malnutrition and obesity.<sup>4 5</sup>

A pooled analysis of population-based studies from 1980-2014 in Africa demonstrated a

significant increase in age-standardised mean BMI across the continent.<sup>6</sup> A recent analysis

of Demographic and Health Surveys conducted between 1991 and 2014 in 24 African

countries revealed a significant increase in obesity among women; rates in some countries

tripled.<sup>7</sup> There is evidence suggesting obesity is increasing more quickly in developing

countries, especially in SSA, compared with developed countries.<sup>8 9</sup> This is associated with

a range of factors including epidemiological and nutritional transition, adoption of western

life styles, decreased physical activity, low fruit and vegetable consumption, increased

consumption of processed foods, and urbanisation.<sup>10-13</sup>

A study using data from 1942 to 1997 on the causes of death in The Gambian capital

Banjul documented the double burden of non-communicable diseases with communicable

diseases and malnutrition.<sup>14</sup> In a nationwide assessment among Gambians aged 16 years

and above in 1996, 18% were underweight, 8% overweight and 2% obese.<sup>15</sup> A related

study in urban and rural communities in The Gambia revealed that 18% of participants

1  
2  
3 were underweight and 4% were obese, with a higher prevalence of obesity (33%) among  
4  
5 urban women aged 35 years and above. <sup>16</sup> Both studies confirmed the persistence of the  
6  
7 double burden of underweight and overweight in The Gambia, although obesity prevalence  
8  
9 was low (but increasing) in those surveys.  
10  
11  
12  
13

14 The double burden of communicable and non-communicable diseases poses a challenge to  
15  
16 governments and families in SSA; The Gambia is no exception. We recently demonstrated  
17  
18 a high prevalence of hypertension in The Gambia, with a greater burden in rural areas and  
19  
20 among adults classified as obese. <sup>17</sup> Moreover, this demographic double burden has  
21  
22 significant implications for wider development concerns. It poses a barrier to poverty  
23  
24 alleviation and can hinder the attainment of the UN Sustainable Development Goals  
25  
26 (SDGs), particularly Target 3.4, which calls for a reduction in premature mortality due to  
27  
28 NCDs by one-third by 2030.<sup>2 18 19</sup> Using the most recent nationally representative data,  
29  
30 including objective anthropometric measurements, the aim of this study was to assess the  
31  
32 burden of underweight, overweight and obesity among adults (aged 25-64 years) in The  
33  
34  
35  
36  
37  
38  
39  
40  
41  
42  
43  
44  
45  
46  
47  
48  
49  
50  
51  
52  
53  
54  
55  
56  
57  
58  
59  
60  
Gambia.



## Methods

### Participants and data collection

Our study is based on secondary analysis of data from the most recent nationally representative population based health examination survey conducted in The Gambia. The study setting and design, sampling, and research instruments have been previously described.<sup>17</sup> Briefly, data were collected from a random sample of adults aged 25-64 years from January to March 2010 using the WHO STEPwise approach.<sup>17 20</sup> The anthropometric measurements were performed by field workers at participants' residences. Weight, height and waist circumference were measured using WHO STEP protocols.<sup>20</sup> The measurements were conducted using standard scales with participants wearing light clothing with foot and head wear removed. Weight was measured to the nearest 0.1kg using digital bathroom scales. Height was measured to the nearest 0.1cm in the standing position, using standard portable stadiometers. Waist circumference was measured (once) to the nearest 0.1cm using a tape measure and was taken midway between the lowest rib and the iliac crest.

### Dependent/Outcome variables

The first outcome variable was generalised obesity, defined using body mass index (BMI). We calculated BMI by dividing weight (in kg) by height squared ( $m^2$ ). We categorised BMI into underweight ( $BMI < 18.5 kg/m^2$ ), normal/desirable weight ( $18.5-24.9 kg/m^2$ ), overweight ( $25.0-29.9 kg/m^2$ ) and obese ( $BMI \geq 30 kg/m^2$ ), using the WHO thresholds.<sup>21</sup> Secondly, we used abdominal obesity (high waist circumference) as the outcome, defined using the International Diabetes Federation thresholds ( $\geq 90$  cm in men and  $\geq 80$  cm in women).<sup>22</sup>

### Independent covariates/predictor variables

The predictor variables included sociodemographic and behavioural risk factors including self-reported age-group, ethnicity, education, residence, fruit and vegetable intake, physical inactivity, and smoking (categories shown in Table S1).

### Statistical analysis

The analytical sample was restricted to non-pregnant participants with valid weight and height data (n=3533); complete case analysis was performed as fewer than 1% of adults with valid weight and height had missing information on other variables. We described the participants' sociodemographic characteristics as well as their behavioural risk factors. The prevalence of BMI categories are reported as proportions with their corresponding 95% confidence intervals (CI). We conducted multivariable multinomial logistic regression analysis to identify factors associated with being underweight, overweight and obese separately, comparing each of these categories with the reference group of normal weight. Age-adjusted and fully-adjusted relative risk ratios (ARRR), with their corresponding 95% CIs, are reported. All analyses were stratified by gender, as we expected that the associations between the predictors and outcomes may differ by gender. We did not include smoking (in women) and alcohol consumption (both sexes) in the regression models due to their low prevalence.

Due to the collinearity of the two variables on residence (i.e. local government area and rurality), fully-adjusted models were repeated interchanging these variables. We explored variables that could modify the association between BMI categories and the covariates by fitting interaction terms. There was no evidence of modification (all  $p > 0.05$ ) and hence multinomial regression models without interaction terms are reported. As in other studies,

1  
2  
3 we did not include abdominal obesity in the models for BMI because of the collinearity of  
4  
5 waist circumference and BMI.<sup>23</sup>  
6  
7

8 We explored the factors associated with abdominal obesity (high waist circumference as  
9  
10 defined above) by conducting multivariable binary logistic regression analysis. BMI was  
11  
12 not included as a predictor in these models because of the aforementioned collinearity of  
13  
14 waist circumference and BMI. For abdominal obesity, age-adjusted (OR) and fully-  
15  
16 adjusted odds ratios (AOR) with corresponding 95% CI are reported.  
17  
18

19  
20 All our analyses were weighted for non-response and adjusted for the complex survey  
21  
22 design in accordance with WHO STEP wise protocols. Analyses were performed using  
23  
24 Stata 15. Ethical approval for the survey was obtained from the National Ethics Committee  
25  
26 of The Gambia; participants gave verbal or written consent.  
27  
28

### 29 30 **Patient and Public Involvement** 31

32  
33 Patients and the public are not directly involved in this study. However, the STEP survey  
34  
35 on which the data reported in this study is based was population based. All the interviews  
36  
37 and anthropometric measurements were conducted at participant's residences. Prior to the  
38  
39 survey, people were sensitised about the objectives of the survey and its importance. The  
40  
41 sensitisation sessions were done on radio, television, community meeting places etc.  
42  
43

44  
45 Results from the previous analyses have been shared. In addition the results are used by  
46  
47 the Ministry of Health of The Gambia in their routine sensitisation campaigns. Like our  
48  
49 previous analysis <sup>17</sup>, the results of this study will be shared with the public and will also be  
50  
51 used to inform policy.  
52  
53  
54  
55  
56  
57  
58  
59  
60

## Results

### Characteristics of participants

The descriptions of respondents' socio-demographic, behavioural and biological characteristics are presented in Tables S1. The unadjusted mean age was 38.3±10.9 years. More than two-fifths of the participants (44%) were in the youngest age-group (25-34 years), particularly among women (53% vs 33% of men). However, there was no age difference by gender after weighting and adjusting for the complex survey design (P=0.937, Table S1). The adjusted mean BMI was 24.6 kg/m<sup>2</sup> (95% CI 24.1-25.1) and the mean waist circumference was 74.0cm (71.1-76.9). Average levels of BMI and waist circumference were higher among women.

### Prevalence of underweight, overweight and obesity

The prevalence of BMI categories by selected socio-demographic and behavioural characteristics are presented for men and women in Tables S2 and S3 respectively. Among men, more than half had a normal/desirable weight (56%, 95% CI 50.8-61.4) and one in ten was underweight (10%, 7.6-12.4). The prevalence of overweight and obesity in men were 26% (21.1-31.6) and 8% (6.0-11.0) respectively (Table S2). Almost a half of women were either overweight (29%, 25.8-31.9) or obese (17%, 14.7-19.7), while 8% (6.1-9.5) were underweight (Table S3). Among both men and women, the prevalence of overweight and of obesity were substantially higher among urban residents, those with a higher level of education, those physically inactive, and those with a high waist circumference. More than 60% of the residents in the capital (Banjul) and the nearby towns (Kanifing Municipality) were either overweight or obese. Obesity was also high among never and ex-smokers in men. The prevalence of abdominal obesity was 10% (CI: 7.8-13.4) in men and 46% (CI: 39.3-52.6) in women (data not shown).

### Factors associated with underweight, overweight and obesity

Factors strongly associated with generalised obesity (versus normal/desirable weight) in the multivariable multinomial logistic regressions included older age, ethnicity, higher education and urban residence among both men and women (Tables 1 and 2). Obesity was also associated with low fruit and vegetable consumption (adjusted relative risk ratio (ARRR) 2.8, 95% CI: 1.1-6.8) in men. All these variables with the exception of ethnicity in men were also strongly associated with overweight (versus normal weight), while current smoking was inversely associated with overweight (0.5, 0.4-0.7). Compared with rural residents, the associations of overweight and obesity among urban residents were three- and six-fold higher respectively in men (overweight 2.8, 1.5-5.0; obesity 5.8, 2.4-14.5) and three- and five-fold higher in women (overweight 3.1, 1.9-5.0; obesity 4.7, 2.7-8.2). Physical inactivity was strongly associated with obesity among both men and women in the age-adjusted models but not in the fully-adjusted models, although the direction of the association remained unchanged (Tables 1 and 2).

**Table 1: Multinomial logistic regression on factors associated with being underweight, overweight or obese in men** <sup>a, b</sup>

| Variable                             | Model I (Age adjusted)                  |                                        |                                   | Model II (Fully adjusted)                    |                                          |                                     |
|--------------------------------------|-----------------------------------------|----------------------------------------|-----------------------------------|----------------------------------------------|------------------------------------------|-------------------------------------|
|                                      | Underweight<br>RRR(95% CI) <sup>c</sup> | Overweight<br>RRR(95% CI) <sup>c</sup> | Obese<br>RRR(95% CI) <sup>c</sup> | Underweight<br>ARRR (95%<br>CI) <sup>c</sup> | Overweight<br>ARRR (95% CI) <sup>c</sup> | Obese<br>ARRR (95% CI) <sup>c</sup> |
| <b>Age Group</b>                     |                                         |                                        |                                   |                                              |                                          |                                     |
| 25 -34                               | Reference                               | Reference                              | Reference                         | Reference                                    | Reference                                | Reference                           |
| 35-44                                | 0.69(0.40-1.17)                         | 1.61(1.22-2.12)***                     | 0.95(0.56-1.62)                   | 0.75(0.42-1.36)                              | 2.00(1.38-2.90)***                       | 1.58(0.75-3.33)                     |
| 45-54                                | 0.97(0.52-1.81)                         | 1.63(1.06-2.52)*                       | 2.06(1.22-3.48)**                 | 1.31(0.66-2.59)                              | 2.21(1.33-3.67)**                        | 3.42(1.83-6.37)***                  |
| 55-64                                | 0.67(0.37-1.21)                         | 0.96(0.59-1.56)                        | 1.21(0.56-2.57)                   | 0.81(0.43-1.52)                              | 1.13(0.63-2.03)                          | 2.88(1.22-6.80)**                   |
| <b>Ethnicity</b>                     |                                         |                                        |                                   |                                              |                                          |                                     |
| Mandinka                             | Reference                               | Reference                              | Reference                         | Reference                                    | Reference                                | Reference                           |
| Wollof                               | 1.15(0.65-2.03)                         | 1.48(0.93-2.35)                        | 1.85(1.06-3.23)*                  | 1.17(0.66-2.08)                              | 1.34(0.83-2.18)                          | 1.62(1.04-2.53)*                    |
| Fula                                 | 0.71(0.41-1.24)                         | 0.93(0.64-1.35)                        | 1.09(0.49-2.39)                   | 0.46(0.24-0.88)*                             | 1.15(0.77-1.72)                          | 0.80(0.34-1.87)                     |
| Jola                                 | 0.67(0.38-1.18)                         | 0.79(0.45-1.39)                        | 1.05(0.45-2.45)                   | 0.66(0.39-1.13)                              | 1.03(0.56-1.89)                          | 1.29(0.56-2.94)                     |
| Others                               | 0.44(0.19-1.04)                         | 0.91(0.51-1.65)                        | 2.56(1.26-5.20)**                 | 0.37(0.14-0.96)*                             | 0.92(0.45-1.88)                          | 1.97(0.71-5.43)                     |
| <b>Years spent in school</b>         |                                         |                                        |                                   |                                              |                                          |                                     |
| ≤6 Years                             | Reference                               | Reference                              | Reference                         | Reference                                    | Reference                                | Reference                           |
| 7-12 Years                           | 1.19(0.76-1.87)                         | 1.56(1.06-2.31)*                       | 2.54(1.37-4.72)**                 | 1.26(0.75-2.11)                              | 1.28(0.81-2.01)                          | 1.24(0.56-2.75)                     |
| >12 Years                            | 0.48(0.23-1.00)                         | 1.82(1.12-2.96)**                      | 3.19(1.45-7.02)**                 | 0.50(0.23-1.09)                              | 1.66(1.02-2.71)*                         | 2.29 (1.16-4.53)**                  |
| <b>Residence (Rurality)</b>          |                                         |                                        |                                   |                                              |                                          |                                     |
| Rural                                | Reference                               | Reference                              | Reference                         | Reference                                    | Reference                                | Reference                           |
| Semi urban                           | 0.97(0.37-2.53)                         | 2.05(0.95-4.43)                        | 4.14(1.53-11.19)**                | 0.70(0.29-2.11)                              | 1.62(0.70-3.80)                          | 1.58(0.45-5.56)                     |
| Urban                                | 1.18(0.71-1.96)                         | 2.52(1.49-4.27)***                     | 5.03(2.20-11.47)***               | 1.35(0.81-2.23)                              | 2.76(1.52-5.01)***                       | 5.83(2.35-14.50)***                 |
| <b>Smoking</b>                       |                                         |                                        |                                   |                                              |                                          |                                     |
| Never smokers                        | Reference                               | Reference                              | Reference                         | Reference                                    | Reference                                | Reference                           |
| Current smokers                      | 1.71(1.18-2.48)**                       | 0.53(0.38-0.74)***                     | 0.52(0.32-0.84)***                | 1.48(0.97-2.27)                              | 0.52(0.36-0.74)***                       | 0.61(0.34-1.11)                     |
| Ex-smokers                           | 1.71(0.97-3.02)                         | 0.81(0.47-1.40)                        | 0.58(0.26-1.32)                   | 1.86(1.07-3.24)*                             | 0.75(0.38-1.48)                          | 0.58(0.21-1.63)                     |
| <b>Servings of fruit and veg</b>     |                                         |                                        |                                   |                                              |                                          |                                     |
| ≥ 5/day                              | Reference                               | Reference                              | Reference                         | Reference                                    | Reference                                | Reference                           |
| < 5/day                              | 1.31(0.80-2.14)                         | 1.38(0.86-2.22)                        | 1.50(0.74-3.06)                   | 1.38(0.79-2.38)                              | 1.74(1.06-2.87)*                         | 2.75(1.12-6.75)*                    |
| <b>Physical Activity<sup>d</sup></b> |                                         |                                        |                                   |                                              |                                          |                                     |
| ≥600METS/week                        | Reference                               | Reference                              | Reference                         | Reference                                    | Reference                                | Reference                           |
| <600METS/week                        | 0.58(0.25-1.36)                         | 1.46(0.86-2.48)                        | 3.02(1.78-5.13)***                | 0.92(0.31-2.69)                              | 1.20(0.53-2.73)                          | 2.23 (0.87-5.70)                    |

Note: Data shown have been weighted for non-response and the analysis took into account the complex survey design.

Fully adjusted models mutually adjusted for the variables shown in the table

<sup>a</sup> BMI is categorised into underweight (BMI<18.5kg/m<sup>2</sup>), normal (18.5-24.9 kg/m<sup>2</sup>, the reference group), overweight (25.0-29.9kg/m<sup>2</sup>) and obese (BMI ≥30kg/m<sup>2</sup>).

<sup>b</sup> Those with a desirable weight (normal) used as reference

<sup>c</sup> RRR= Relative Risk Ratio adjusted for age (except for age group as the independent variable), ARR= Fully Adjusted Relative Risk Ratio

<sup>d</sup> METS =Metabolic equivalents

\*p<0.05, \*\*p≤0.01, \*\*\* p≤0.001

1  
2  
3  
4  
5  
6  
7  
8  
9  
10  
11  
12  
13  
14  
15  
16  
17  
18  
19  
20  
21  
22  
23  
24  
25  
26  
27  
28  
29  
30  
31  
32  
33  
34  
35  
36  
37  
38  
39  
40  
41  
42  
43  
44  
45  
46

For peer review only

**Table 2: Multinomial logistic regression on factors associated with generalised underweight, overweight and obesity in women** <sup>a, b</sup>

| Variable                             | Model I (Age adjusted)                  |                                        |                                   | Model II (Fully adjusted)                 |                                          |                                     |
|--------------------------------------|-----------------------------------------|----------------------------------------|-----------------------------------|-------------------------------------------|------------------------------------------|-------------------------------------|
|                                      | Underweight<br>RRR(95% CI) <sup>c</sup> | Overweight<br>RRR(95% CI) <sup>c</sup> | Obese<br>RRR(95% CI) <sup>c</sup> | Underweight<br>ARRR (95% CI) <sup>c</sup> | Overweight<br>ARRR (95% CI) <sup>c</sup> | Obese<br>ARRR (95% CI) <sup>c</sup> |
| <b>Age Group</b>                     |                                         |                                        |                                   |                                           |                                          |                                     |
| 25 -34                               | Reference                               | Reference                              | Reference                         | Reference                                 | Reference                                | Reference                           |
| 35-44                                | 0.85(0.55-1.31)                         | 1.16(0.83-1.61)                        | 1.67(1.10-2.54)*                  | 0.79(0.52-1.19)                           | 1.37(0.93-2.01)                          | 2.25(1.31-3.85)**                   |
| 45-54                                | 0.92(0.50-1.71)                         | 1.42(1.01-1.99)*                       | 1.65(1.00-2.73)                   | 0.88(0.48-1.62)                           | 1.98(1.33-2.96)***                       | 2.66(1.43-4.94)**                   |
| 55-64                                | 2.09(1.04-4.18)*                        | 1.82(1.03-3.24)*                       | 4.04(2.20-7.39)                   | 2.30(1.10-4.80)*                          | 2.81(1.58-4.99)***                       | 4.90(2.44-9.82)***                  |
| <b>Ethnicity</b>                     |                                         |                                        |                                   |                                           |                                          |                                     |
| Mandinka                             | Reference                               | Reference                              | Reference                         | Reference                                 | Reference                                | Reference                           |
| Wollof                               | 0.64(0.32-1.25)                         | 1.31(0.80-2.16)                        | 2.07(1.19-3.61)**                 | 0.69(0.36-1.29)                           | 1.19(0.75-1.87)                          | 1.50(0.90-2.48)                     |
| Fula                                 | 1.03(0.60-1.78)                         | 1.43(1.01-2.00)*                       | 1.51(0.94-2.41)                   | 0.87(0.47-1.58)                           | 1.69(1.20-2.38)**                        | 1.78(1.09-2.92)*                    |
| Jola                                 | 1.15(0.64-2.08)                         | 1.14(0.72-1.82)                        | 1.68(0.92-3.07)                   | 1.01(0.57-1.77)                           | 0.98(0.64-1.51)                          | 1.10(0.66-1.84)                     |
| Others                               | 0.63(0.31-1.27)                         | 1.54(0.96-2.47)                        | 1.57(0.84-2.92)                   | 0.34(0.14-0.80)**                         | 1.33(0.78-2.28)                          | 1.21(0.62-2.36)                     |
| <b>Years spent in school</b>         |                                         |                                        |                                   |                                           |                                          |                                     |
| ≤6 Years                             | Reference                               | Reference                              | Reference                         | Reference                                 | Reference                                | Reference                           |
| 7-12 Years                           | 0.10(0.58-1.69)                         | 1.93(1.31-2.85)***                     | 2.93(1.85-4.64)***                | 1.12(0.63-1.99)                           | 1.31(0.87-1.95)                          | 1.67(1.00-2.77)*                    |
| >12 Years                            | 1.37(0.46-4.14)                         | 3.09(1.53-6.22)**                      | 3.47(1.37-8.89)**                 | 1.93 (0.52-7.18)                          | 2.40(1.10-5.20)*                         | 2.58(1.05-6.36)*                    |
| <b>Residence (Rurality)</b>          |                                         |                                        |                                   |                                           |                                          |                                     |
| Rural                                | Reference                               | Reference                              | Reference                         | Reference                                 | Reference                                | Reference                           |
| Semi urban                           | 0.47(0.29-0.75)**                       | 2.52(1.75-3.63)***                     | 2.75(1.71-4.43)**                 | 0.54(0.31-0.95)*                          | 2.31(1.46-3.65)***                       | 2.25(1.22-4.14)**                   |
| Urban                                | 0.68(0.41-1.13)                         | 3.03(2.06-4.46)***                     | 5.06(3.24-7.90)***                | 0.84(0.46-1.55)                           | 3.05(1.86-5.01)***                       | 4.71(2.72-8.15)***                  |
| <b>Servings of fruits and vegs</b>   |                                         |                                        |                                   |                                           |                                          |                                     |
| ≥ 5/day                              | Reference                               | Reference                              | Reference                         | Reference                                 | Reference                                | Reference                           |
| < 5/day                              | 0.71(0.41-1.24)                         | 1.03(0.73-1.46)                        | 0.95(0.62-1.46)                   | 0.65(0.37-1.15)                           | 1.10(0.73-1.66)                          | 1.13(0.74-1.75)                     |
| <b>Physical Activity<sup>d</sup></b> |                                         |                                        |                                   |                                           |                                          |                                     |
| ≥600METS/week                        | Reference                               | Reference                              | Reference                         | Reference                                 | Reference                                | Reference                           |
| <600METS/week                        | 0.81(0.42-1.54)                         | 1.32(0.83-2.11)                        | 1.67(1.08-2.58)*                  | 1.19(0.58-2.44)                           | 1.07(0.63-1.82)                          | 1.02(0.55-1.91)                     |

Note: Data shown have been weighted for non-response and the analysis took into account the complex survey design.

Fully adjusted models mutually adjusted for the variables shown in the table

<sup>a</sup> BMI is categorised into underweight (BMI<18.5kg/m<sup>2</sup>), normal (18.5-24.9 kg/m<sup>2</sup>, the reference group), overweight (25.0-29.9kg/m<sup>2</sup>) and obese (BMI ≥30kg/m<sup>2</sup>).

<sup>b</sup> Those with a desirable weight(normal) used as reference ; <sup>c</sup>RRR= Relative Risk Ratio adjusted for age (except for age group as the independent variable), ARRR= Fully Adjusted Relative Risk Ratio ; <sup>d</sup> METS =Metabolic equivalents . \*p<0.05, \*\*p≤0.01, \*\*\* p≤0.001



1  
2  
3 No strong associations were found for underweight (versus normal weight) in men except  
4  
5 an increased ARRR among ex-smokers (ARRR 1.9, 1.1-3.2) and an inverse association  
6  
7 with being Fula (0.5, 0.2-0.9) or minority ethnicity (0.4, 0.1-1.0) compared with being  
8  
9 Mandinka (Table 1). Among women, the risk of being underweight (versus normal weight)  
10  
11 was higher among those aged 55-64 years compared with those aged 25-34 years (2.3, CI:  
12  
13 1.1-4.8) and was inversely related with semi-urban residence compared with rural  
14  
15 residence (0.5, 0.3-1.0) and to minority ethnicity compared with Mandinka (0.3, 0.1-0.8)  
16  
17 (Table 2).  
18  
19  
20  
21  
22  
23

#### 24 Factors associated with abdominal obesity

25  
26 In the fully-adjusted multivariable binary logistic regression model, older age, residence,  
27  
28 low fruit and vegetable intake (men only) and being an ex-smoker compared with never  
29  
30 smoking (men only) were strongly associated with higher odds of abdominal obesity  
31  
32 (Table 3). Semi-urban residence (adjusted odds ratio (AOR) 0.4, 95% CI: 0.2-0.9)  
33  
34 compared with rural residence, and low fruit and vegetable intake (0.6, 0.4-0.9) compared  
35  
36 with the recommended intake of at least five servings a day, were inversely associated with  
37  
38 the odds of abdominal obesity among men. Older age (3.2, 2.1-4.9) compared with  
39  
40 younger age, and semi-urban residence (2.1, 1.2-3.7) compared with rural residence, were  
41  
42 associated with higher odds of abdominal obesity among women (Table 3).  
43  
44  
45  
46  
47  
48  
49  
50  
51  
52  
53  
54  
55  
56  
57  
58  
59  
60

**Table 3: Multivariate logistic regression on factors associated with high waist circumference (abdominal obesity)<sup>a</sup>**

| Variable                                             | Men                                             |                                                    |                                                     | Women                                           |                                                    |                                                     |
|------------------------------------------------------|-------------------------------------------------|----------------------------------------------------|-----------------------------------------------------|-------------------------------------------------|----------------------------------------------------|-----------------------------------------------------|
|                                                      | Model I <sup>b</sup><br>OR(95% CI) <sup>c</sup> | Model II <sup>b</sup><br>AOR (95% CI) <sup>c</sup> | Model III <sup>b</sup><br>AOR (95% CI) <sup>c</sup> | Model I <sup>b</sup><br>OR(95% CI) <sup>c</sup> | Model II <sup>b</sup><br>AOR (95% CI) <sup>c</sup> | Model III <sup>b</sup><br>AOR (95% CI) <sup>c</sup> |
| <b>Age Group</b>                                     |                                                 |                                                    |                                                     |                                                 |                                                    |                                                     |
| 25 -34                                               | Reference                                       | Reference                                          | Reference                                           | Reference                                       | Reference                                          | Reference                                           |
| 35-44                                                | 1.63(1.08-2.47)*                                | 2.04(1.21-3.43)**                                  | 1.62(0.96-2.74)                                     | 2.06(1.52-2.80)***                              | 2.17 (1.60-2.92)***                                | 2.04(1.49-2.77)***                                  |
| 45-54                                                | 1.89(1.19-3.00)**                               | 2.50(1.41-4.43)**                                  | 1.97 (1.14-3.38)**                                  | 1.91(1.38-2.65)***                              | 1.91(1.34-2.72)***                                 | 1.91(1.33-2.74)***                                  |
| 55-64                                                | 2.26(1.36-3.75)**                               | 2.24(1.16-4.34)*                                   | 1.90(0.96-3.75)                                     | 3.57(2.32-5.49)***                              | 3.39(2.07-5.56)***                                 | 3.19(2.09-4.87)***                                  |
| <b>Ethnicity</b>                                     |                                                 |                                                    |                                                     |                                                 |                                                    |                                                     |
| Mandinka                                             | Reference                                       | Reference                                          | Reference                                           | Reference                                       | Reference                                          | Reference                                           |
| Wollof                                               | 1.12(0.43-2.90)                                 | 1.11(0.51-2.43)                                    | 1.06(0.40-2.78)                                     | 0.92(0.58-1.46)                                 | 1.01(0.64-1.58)                                    | 0.81(0.51-1.28)                                     |
| Fula                                                 | 0.96(0.49-1.91)                                 | 1.05(0.51-2.15)                                    | 0.90(0.45-1.76)                                     | 0.79(0.55-1.13)                                 | 0.82(0.55-1.21)                                    | 0.69(0.48-0.99)*                                    |
| Jola                                                 | 1.22(0.60-2.51)                                 | 0.86(0.41-1.80)                                    | 1.02(0.49-2.12)                                     | 0.94(0.62-1.42)                                 | 0.82(0.49-1.36)                                    | 0.97(0.62-1.53)                                     |
| Others                                               | 0.81(0.38-1.74)                                 | 0.71(0.30-1.67)                                    | 0.63(0.27-1.44)                                     | 0.58(0.33-1.01)                                 | 1.00(0.54-1.84)                                    | 0.74(0.43-1.28)                                     |
| <b>Years spent in school</b>                         |                                                 |                                                    |                                                     |                                                 |                                                    |                                                     |
| ≤6 Years                                             | Reference                                       | Reference                                          | Reference                                           | Reference                                       | Reference                                          | Reference                                           |
| 7-12 Years                                           | 0.96(0.58-1.59)                                 | 0.97(0.60-1.59)                                    | 0.86(0.50-1.46)                                     | 0.84(0.59-1.20)                                 | 1.10(0.78-1.55)                                    | 0.81(0.61-1.09)                                     |
| >12 Years                                            | 1.21(0.65-2.28)                                 | 1.25(0.68-2.31)                                    | 1.06(0.58-1.97)                                     | 0.75(0.32-1.76)                                 | 0.92(0.37-2.24)                                    | 0.82(0.32-2.06)                                     |
| <b>Residence (Local government area)<sup>d</sup></b> |                                                 |                                                    |                                                     |                                                 |                                                    |                                                     |
| LRR                                                  | Reference                                       | Reference                                          |                                                     | Reference                                       | Reference                                          |                                                     |
| CRR                                                  | 1.75(0.32-9.53)                                 | 1.92(0.44-8.32)                                    |                                                     | 0.89(0.33-2.41)                                 | 1.20(0.45-3.18)                                    |                                                     |
| NBR                                                  | 1.94(0.66-5.65)                                 | 1.63(0.55-4.85)                                    |                                                     | 1.18(0.64-2.20)                                 | 1.08(0.57-2.06)                                    |                                                     |
| URR                                                  | 0.08(0.01-0.65)**                               | 0.14(0.02-0.98)*                                   |                                                     | 0.24(0.11-0.51)***                              | 0.26(0.11-0.65)**                                  |                                                     |
| WCR                                                  | 2.66(1.02-6.96)                                 | 2.43(0.94-6.32)                                    |                                                     | 1.62(0.83-3.15)                                 | 1.59(0.79-3.20)                                    |                                                     |
| Banjul & KM                                          | 0.71(0.25-2.03)                                 | 0.71(0.24-2.07)                                    |                                                     | 0.32(0.15-0.71)                                 | 0.37(0.14-1.00)                                    |                                                     |
| <b>Residence (Rurality)</b>                          |                                                 |                                                    |                                                     |                                                 |                                                    |                                                     |
| Rural                                                | Reference                                       |                                                    | Reference                                           | Reference                                       |                                                    | Reference                                           |
| Semi urban                                           | 0.32(0.12-0.82)**                               |                                                    | 0.36(0.15-0.90)*                                    | 1.53(0.75-3.10)                                 |                                                    | 2.11(1.21-3.68)**                                   |
| Urban                                                | 0.89(0.45-1.75)                                 |                                                    | 0.82(0.41-1.65)                                     | 0.82(0.49-1.37)                                 |                                                    | 0.97(0.58-1.62)                                     |
| <b>Smoking</b>                                       |                                                 |                                                    |                                                     |                                                 |                                                    |                                                     |
| Never smokers                                        | Reference                                       | Reference                                          | Reference                                           |                                                 |                                                    |                                                     |
| Current smokers                                      | 0.72(0.42-1.26)                                 | 0.49(0.28-0.86)**                                  | 0.60(0.35-1.03)                                     |                                                 |                                                    |                                                     |

1  
2  
3  
4  
5  
6  
7  
8  
9  
10  
11  
12  
13  
14  
15  
16  
17  
18  
19  
20  
21  
22  
23  
24  
25  
26  
27  
28  
29  
30  
31  
32  
33  
34  
35  
36  
37  
38  
39  
40  
41  
42  
43  
44  
45  
46

| Variable                                | Men                     |                           |                           | Women                   |                           |                           |
|-----------------------------------------|-------------------------|---------------------------|---------------------------|-------------------------|---------------------------|---------------------------|
|                                         | Model I <sup>b</sup>    | Model II <sup>b</sup>     | Model III <sup>b</sup>    | Model I <sup>b</sup>    | Model II <sup>b</sup>     | Model III <sup>b</sup>    |
|                                         | OR(95% CI) <sup>c</sup> | AOR (95% CI) <sup>c</sup> | AOR (95% CI) <sup>c</sup> | OR(95% CI) <sup>c</sup> | AOR (95% CI) <sup>c</sup> | AOR (95% CI) <sup>c</sup> |
| Ex-smokers                              | 1.44(0.92-2.27)         | 1.24(0.81-1.91)           | 1.56(1.04-2.36)*          |                         |                           |                           |
| <b>Servings of fruit and vegetables</b> |                         |                           |                           |                         |                           |                           |
| ≥ 5/day                                 | Reference               | Reference                 | Reference                 | Reference               | Reference                 | Reference                 |
| < 5/day                                 | 0.63(0.40-0.99)*        | 0.61(0.37-1.01)           | 0.59(0.37-0.93)*          | 0.95(0.64-1.42)         | 0.86(0.50-1.49)           | 0.81(0.48-1.20)           |
| <b>Physical Activity<sup>e</sup></b>    |                         |                           |                           |                         |                           |                           |
| <600METS/week                           | Reference               | Reference                 | Reference                 | Reference               | Reference                 | Reference                 |
| ≥600METS/week                           | 0.78(0.37-1.63)         | 1.81(0.81-4.06)           | 1.52(0.65-3.57)           | 0.64(0.32-1.30)         | 1.46(0.81-2.62)           | 1.22(0.71-2.10)           |

Note: Data shown have been weighted for non-response and the analysis took into account the complex survey design.

<sup>a</sup>Based on the definition of the International Diabetes Federation (High waist circumference, indicating abdominal obesity defined as ≥90 cm in men or ≥80 cm in women)

<sup>b</sup> Model I adjusted for age only; Model II adjusted for all variables except local government area; Model III adjusted for all variables except rurality

<sup>c</sup> OR= odds ratio adjusted for age (except for age group as the independent variable); AOR= Adjusted odds ratio (fully adjusted)

<sup>d</sup>KM=Kanifing Municipality; WCR =West Coast Region; LRR= Lower River Region; NBR =North Bank Region; CRR = Central River Region; URR =Upper River Region

<sup>e</sup> METS =Metabolic equivalents

\*p<0.05, \*\*p≤0.01, \*\*\* p≤0.001

## Discussion

This study has shown that the burden of overweight and obesity is high in The Gambia, especially among women (29% and 17% respectively) and urban residents. No precise quantification of changes over time in prevalence can be made since the only previous nationwide study was based on a different age cohort.<sup>15</sup> Nevertheless, we can reasonably assume that the prevalence of obesity has increased substantially in The Gambia within a period of less than 15 years. Almost half of women and more than one-third of men aged 25-64 years were either overweight or obese in 2010 while the prevalence of overweight and obesity in 1996 were 8% and 2% respectively among participants aged 16 years and above. The prevalence of underweight, however, halved from 18% in 1996 to 9% in this study. This shows an increasing shift from malnutrition/underweight to overweight and obesity among Gambian adults. These changes reflect shifts in growing economic progress, modernization of household tasks, improved transportation and increasing urbanization.

The prevalence of obesity in The Gambia is more than double the levels reported in similar national WHO STEPwise surveys conducted in Malawi<sup>24</sup>, Eritrea<sup>25</sup> and Mozambique<sup>26 27</sup> but is less than that reported in The Republic of Seychelles.<sup>28</sup> The high prevalence of obesity in The Gambia is a cause for concern, given the increasing burden of NCDs, notably hypertension.<sup>17</sup> Although higher in urban areas, generalised obesity is now a problem in both urban and rural areas in The Gambia, in contrast to the evidence from previous studies.<sup>15 16</sup> Despite the health risks associated with overweight/obesity, Gambians are culturally obesity tolerant.<sup>29 30</sup> It has been well documented that perceptions of body weight vary across different parts of the world.<sup>31 32</sup> In some parts of SSA, being overweight is not perceived as a risk factor for NCDs but rather is perceived as a sign of beauty, wealth, success and prestige; such cultural beliefs encourage obesity.<sup>31 32</sup> This is the case in The Gambia.; a study on the

1  
2  
3 perception of body image and attractiveness among adults in urban areas in The Gambia  
4  
5 demonstrated high satisfaction with big body image (overweight), especially among women.  
6  
7 <sup>29</sup> A cross-cultural comparison using published data on Figure Rating Scales found that  
8  
9 Gambians' rating of a 'normal' weight were bigger than those of North Americans, and that  
10  
11 Gambians were more tolerant of obesity than white and African-Americans. <sup>29</sup> A related  
12  
13 study also conducted in The Gambia showed that weight gain was not associated with weight  
14  
15 concern, as 68% of those overweight and 37% of those obese did not perceive themselves to  
16  
17 be overweight/obese. <sup>30</sup> Findings from other SSA countries have indicated that women tend  
18  
19 to frame fatness as a symbol of wealth, as has been found for example, in Senegal <sup>33 34</sup> and in  
20  
21 Zambia. <sup>35</sup> Associating overweight/obesity with beauty and prestige/wealth renders the  
22  
23 burden of obesity a silent epidemic, as many people in The Gambia do not consider it a risk  
24  
25 or want to address it.

26  
27  
28  
29  
30  
31  
32  
33 Our models showed that older age, ethnicity, higher education, and urban residence in both  
34  
35 genders, and low fruit and vegetable intake and smoking in men, were strongly associated  
36  
37 with the risks of overweight and obesity (versus normal weight). Evidence links urbanisation  
38  
39 and the increasing burden of obesity and other NCDs, especially in low income countries. <sup>36-</sup>  
40  
41  
42 <sup>39</sup> Higher education was also significantly associated with overweight and obesity in our  
43  
44 study. In The Gambia highly educated adults are more likely to be in office jobs, which are  
45  
46 mostly sedentary. Physical inactivity was strongly associated with obesity in the age-  
47  
48 adjusted regression models among both men and women. However this relationship became  
49  
50 statistically insignificant after full-adjustment for social and demographic factors, suggesting  
51  
52 that social and demographic factors may be confounding the relationship between physical  
53  
54 inactivity and obesity. Leisure-time physical activity was low among the study participants;  
55  
56 only 12% of adults in the present study reported engaging in any form of leisure time activity:  
57  
58  
59  
60

1  
2  
3 most of the physical activity reported was therefore work- and transport-related. Judging  
4  
5 from the data, participants with a higher level of education therefore had lower levels of  
6  
7 physical activity and hence were more prone to obesity. There is evidence suggesting that  
8  
9 increases in the level of physical activity and/or exercise interventions whether supervised or  
10  
11 not has a positive impact on BMI and overall health.<sup>40</sup> Our data suggests that leisure time  
12  
13 physical activity is low in The Gambia.the Ministry of Health and Social Welfare of The  
14  
15 Gambia and its stakeholders should promote physical activity at the individual and population  
16  
17 levels. As the promotion of physical activity, especially at the population level, is  
18  
19 multidisciplinary, it should be done in collaboration with other government line ministries,  
20  
21 municipalities, community based organisations and non-governmental organisations. The  
22  
23 goal of the recent WHO Global action plan on physical activity 2018-2030 ('more active  
24  
25 people for a healthier world') is to reduce the global prevalence of physical inactivity by 15%  
26  
27 by 2030.<sup>41</sup> Our findings support the advisability of the Ministry of Health of The Gambia  
28  
29 incorporating this in its national health policy and/or the NCDs policy and strategic plan.  
30  
31  
32  
33  
34  
35  
36  
37

38 Low fruit and vegetable intake (defined as having fewer than five combined servings a day)  
39  
40 was associated with obesity in our study, especially among men. There is a strong linkage  
41  
42 between low fruit and vegetable consumption and increased NCD risk. Regular consumption  
43  
44 of fruits and vegetables may help prevent unhealthy weight gain, especially when taken as  
45  
46 part of a healthy diet.<sup>42 43</sup> A systematic analysis for the Global Burden of Diseases study in  
47  
48 2010 attributed more than 6 million deaths globally to inadequate consumption of fruits and  
49  
50 vegetables.<sup>44</sup> An additional finding from our data is that the consumption of fruits and  
51  
52 vegetables was low consumption of fruits and vegetables as part of a healthy diet should be  
53  
54 widely promoted. Future surveys to monitor overweight/obesity in The Gambia should  
55  
56 include a more comprehensive assessment of diet than that collected in the 2010 survey.  
57  
58  
59  
60

1  
2  
3 Only being an ex-smoker in men and older age in women were positively associated with  
4 being underweight (versus normal weight) in the fully-adjusted analyses. Semi-urban  
5  
6 residents were less likely to be underweight rather than normal weight compared with rural  
7  
8 residents. The association of underweight with being an ex-smoker might be at least partly  
9  
10 explained by the associations of both with ill-health. It is possible that ex-smokers were  
11  
12 advised to quit smoking because of their illness. Moreover, the association of underweight  
13  
14 with older age in women could also be associated with age-related illnesses. Poverty,  
15  
16 especially in rural areas, may explain the inverse association of underweight with semi-urban  
17  
18 compared with rural residence among women.  
19  
20  
21  
22  
23  
24  
25

26 A potential positive finding from this study is that higher rates of obesity are found among  
27  
28 those with higher incomes, more education and more urban based members of the population,  
29  
30 the very people who may be most effectively reached by public health campaigns.  
31  
32  
33  
34

### 35 Strengths and limitations of this study

36  
37 This study presents the most recent nationally-representative data on obesity among adults in  
38  
39 The Gambia. It gives a better picture of the true burden of obesity in the country and hence  
40  
41 could serve as baseline study from which future changes can be assessed. The complex  
42  
43 sampling strategy and the stringent WHO STEP protocols applied in collecting the data,  
44  
45 particularly the use of measurements taken by trained field staff instead of a reliance on self-  
46  
47 reported anthropometric data, minimised biases.  
48  
49  
50  
51  
52

53 Our main limitation is the cross-sectional nature of the study, which prevents attribution of  
54  
55 causality to the associations. However, it does identify population sub-groups to prioritise  
56  
57 with health promotion measures. There is a possibility of misclassifying obesity in people  
58  
59  
60

1  
2  
3 who are physically active and have large muscle mass. For this reason we explored  
4  
5 abdominal obesity as an additional outcome variable. 3% of the participants who took part in  
6  
7 the physical measurements did not have valid weight and height measurements, which could  
8  
9 have led to non-response bias. However, we compared the two groups and there were no  
10  
11 systematic differences between those with and without valid anthropometric measurements  
12  
13 (data not shown). The survey did not collect self-reported measures on beliefs about body  
14  
15 size and weight management, which are important in The Gambian context to assess and  
16  
17 monitor trends on beliefs and practices.  
18  
19  
20  
21  
22  
23

## 24 **Conclusion**

25  
26 This study reveals a high prevalence of obesity among Gambian adults, while the burden of  
27  
28 underweight in this population may be decreasing. There are socio-cultural norms that  
29  
30 promote overweight, especially among women. Preventive strategies should be directed at  
31  
32 raising awareness of the importance of achieving and maintaining a healthy weight;  
33  
34 discouraging harmful socio-cultural practices and beliefs about weight; and the promotion of  
35  
36 healthy diet and regular physical activity during leisure-time, particularly in urban areas and  
37  
38 among women.  
39  
40  
41  
42  
43  
44  
45  
46  
47  
48  
49  
50  
51  
52  
53  
54  
55  
56  
57  
58  
59  
60



### **Acknowledgements.**

We thank the WHO for their technical and financial support to conduct the survey and the Ministry of Health of The Gambia for the authorisation to use the data. The first author thanks the Islamic Development Bank (IDB) for funding his PhD research at UCL (University College London).

### **Conflict of interest**

The authors have no conflict of interest to declare.

### **Funding**

Bai Cham's PhD was funded by the Islamic Development Bank but no funding was received to work on this manuscript.

### **Author Contributions**

BC conceptualised the paper, analysed the data and wrote the first draft of the manuscript. J.S.M, SS, N.E.G and L.N.F revised the work critically for important academic content. OB supervised the survey data collection process and contributed in the revision of the manuscript. All the authors approve the final version of the manuscript

## References

1. Dalal S, Beunza JJ, Volmink J, et al. Non-communicable diseases in sub-Saharan Africa: what we know now. *Int J Epidemiol* 2011;40(4):885-901. doi: 10.1093/ije/dyr050
2. WHO. Noncommunicable diseases Factsheet 2017 [updated 06/07/2017; cited 2017 12/07/2017]. Available from: <http://www.who.int/mediacentre/factsheets/fs355/en/>.
3. NCD Risk Factor Collaboration. Trends in adult body-mass index in 200 countries from 1975 to 2014: a pooled analysis of 1698 population-based measurement studies with 19· 2 million participants. *The Lancet* 2016;387(10026):1377-96.
4. Boutayeb A. The double burden of communicable and non-communicable diseases in developing countries. *Trans R Soc Trop Med Hyg* 2006;100(3):191-9. doi: 10.1016/j.trstmh.2005.07.021 [published Online First: 2005/11/09]
5. Nyirenda MJ. Non-communicable diseases in sub-Saharan Africa: understanding the drivers of the epidemic to inform intervention strategies. *Int Health* 2016;8(3):157-8. doi: 10.1093/inthealth/ihw021 [published Online First: 2016/05/15]
6. NCD Risk Factor Collaboration –Africa Working Group. Trends in obesity and diabetes across Africa from 1980 to 2014: an analysis of pooled population-based studies. *Int J Epidemiol* 2017;46(5):1421-32.
7. Amugsi DA, Dimbuene ZT, Mberu B, et al. Prevalence and time trends in overweight and obesity among urban women: an analysis of demographic and health surveys data from 24 African countries, 1991-2014. *BMJ open* 2017;7(10):e017344. doi: 10.1136/bmjopen-2017-017344 [published Online First: 2017/10/29]
8. Popkin BM, Slining MM. New dynamics in global obesity facing low- and middle-income countries. *Obes Rev* 2013;14 Suppl 2:11-20. doi: 10.1111/obr.12102 [published Online First: 2013/10/10]
9. Owolabi EO, Ter Goon D, Adeniyi OV. Central obesity and normal-weight central obesity among adults attending healthcare facilities in Buffalo City Metropolitan Municipality, South Africa: a cross-sectional study. *J Health Popul Nutr* 2017;36(1):54. doi: 10.1186/s41043-017-0133-x [published Online First: 2017/12/29]
10. Ojofeitimi E, Adeyeye A, Fadiora A, et al. Awareness of obesity and its health hazard among women in a university community. *Pakistan Journal of Nutrition* 2007;6(5):502-05.
11. Doku DT, Neupane S. Double burden of malnutrition: increasing overweight and obesity and stall underweight trends among Ghanaian women. *BMC Public Health* 2015;15:670. doi: 10.1186/s12889-015-2033-6 [published Online First: 2015/07/17]
12. Biadgilign S, Mgutshini T, Haile D, et al. Epidemiology of obesity and overweight in sub-Saharan Africa: a protocol for a systematic review and meta-analysis. *BMJ open* 2017;7(11):e017666. doi: 10.1136/bmjopen-2017-017666 [published Online First: 2017/11/28]
13. Bosu WK. An overview of the nutrition transition in West Africa: implications for non-communicable diseases. *Proc Nutr Soc* 2015;74(4):466-77. doi: 10.1017/s0029665114001669 [published Online First: 2014/12/23]
14. van der Sande MA, Inskip HM, Jaiteh KO, et al. Changing causes of death in the West African town of Banjul, 1942-97. *Bull World Health Organ* 2001;79(2):133-41. [published Online First: 2001/03/13]
15. van der Sande MAB, Bailey R, Faal H, et al. Nationwide prevalence study of hypertension and related non-communicable diseases in The Gambia. *Trop Med Int Health* 1997;2(11):1039-48. doi: DOI 10.1046/j.1365-3156.1997.d01-184.x
16. van der Sande MAB, Ceesay SM, Milligan PJM, et al. Obesity and undernutrition and cardiovascular risk factors in rural and urban Gambian communities. *Am J Public Health* 2001;91(10):1641-44.
17. Cham B, Scholes S, Ng Fat L, et al. Burden of hypertension in The Gambia: evidence from a national World Health Organization (WHO) STEP survey. *Int J Epidemiol* 2018;47(3):860-71. doi: 10.1093/ije/dyx279 [published Online First: 2018/02/03]

18. Clark H. NCDs: a challenge to sustainable human development. *Lancet* 2013;381(9866):510-1. doi: 10.1016/s0140-6736(13)60058-6 [published Online First: 2013/02/16]
19. Lal P, Jacob A, Buragohain A. UN Development Programme and non-communicable diseases. *Lancet* 2013;382(9889):305. doi: 10.1016/s0140-6736(13)61628-1 [published Online First: 2013/07/31]
20. WHO. STEPS: A framework for surveillance: The WHO STEPwise approach to Surveillance of non-communicable diseases (STEPS), 2003.
21. WHO. Obesity: preventing and managing the global epidemic. Report of a WHO Consultation. WHO Technical Report Series 894, 2000.
22. International Diabetes Federation. The IDF consensus worldwide definition of the Metabolic Syndrome. Brussels 2006.
23. Han TS, van Leer EM, Seidell JC, et al. Waist circumference action levels in the identification of cardiovascular risk factors: prevalence study in a random sample. *BMJ* 1995;311(7017):1401-5. [published Online First: 1995/11/25]
24. Msyamboza KP, Kathyola D, Dzowela T. Anthropometric measurements and prevalence of underweight, overweight and obesity in adult Malawians: nationwide population based NCD STEPS survey. *Pan Afr Med J* 2013;15:108. doi: 10.11604/pamj.2013.15.108.2622 [published Online First: 2013/11/19]
25. Mufunda J, Mebrahtu G, Usman A, et al. The prevalence of hypertension and its relationship with obesity: results from a national blood pressure survey in Eritrea. *J Hum Hypertens* 2006;20(1):59-65. doi: 10.1038/sj.jhh.1001924 [published Online First: 2005/09/10]
26. Gomes A, Damasceno A, Azevedo A, et al. Body mass index and waist circumference in Mozambique: urban/rural gap during epidemiological transition. *Obes Rev* 2010;11(9):627-34. doi: 10.1111/j.1467-789X.2010.00739.x [published Online First: 2010/04/22]
27. Damasceno A, Azevedo A, Silva-Matos C, et al. Hypertension prevalence, awareness, treatment, and control in Mozambique: urban/rural gap during epidemiological transition. *Hypertension* 2009;54(1):77-83. doi: 10.1161/hypertensionaha.109.132423 [published Online First: 2009/05/28]
28. Faeh D, William J, Tappy L, et al. Prevalence, awareness and control of diabetes in the Seychelles and relationship with excess body weight. *BMC Public Health* 2007;7:163. doi: 10.1186/1471-2458-7-163 [published Online First: 2007/07/21]
29. Siervo M, Grey P, Nyan OA, et al. A pilot study on body image, attractiveness and body size in Gambians living in an urban community. *Eat Weight Disord* 2006;11(2):100-9. [published Online First: 2006/07/01]
30. Siervo M, Grey P, Nyan OA, et al. Urbanization and obesity in The Gambia: a country in the early stages of the demographic transition. *Eur J Clin Nutr* 2006;60(4):455-63. doi: 10.1038/sj.ejcn.1602337 [published Online First: 2005/11/25]
31. Gele AA, Mbalilaki AJ. Overweight and obesity among African immigrants in Oslo. *BMC Res Notes* 2013;6:119. doi: 10.1186/1756-0500-6-119 [published Online First: 2013/03/28]
32. Scott A, Ejikeme CS, Clotey EN, et al. Obesity in sub-Saharan Africa: development of an ecological theoretical framework. *Health Promot Int* 2012:das038.
33. Holdsworth M, Gartner A, Landais E, et al. Perceptions of healthy and desirable body size in urban Senegalese women. *Int J Obes Relat Metab Disord* 2004;28(12):1561-8. doi: 10.1038/sj.ijo.0802739 [published Online First: 2004/07/28]
34. Macia E, Cohen E, Gueye L, et al. Prevalence of obesity and body size perceptions in urban and rural Senegal: new insight on the epidemiological transition in West Africa. *Cardiovasc J Afr* 2017;28(5):324-30. doi: 10.5830/cvja-2017-034 [published Online First: 2017/10/31]
35. Tateyama Y, Musumari PM, Techasrivichien T, et al. Dietary habits, body image, and health service access related to cardiovascular diseases in rural Zambia: A qualitative study. *PLoS One* 2019;14(2):e0212739. doi: 10.1371/journal.pone.0212739 [published Online First: 2019/02/23]

- 1  
2  
3 36. Godfrey R, Julien M. Urbanisation and health. *Clin Med (Lond)* 2005;5(2):137-41. [published Online  
4 First: 2005/04/26]  
5 37. Kruger HS, Venter CS, Vorster HH. Obesity in African women in the North West Province, South  
6 Africa is associated with an increased risk of non-communicable diseases: the THUSA study.  
7 Transition and Health during Urbanisation of South Africans. *Br J Nutr* 2001;86(6):733-40.  
8 [published Online First: 2001/12/26]  
9 38. Ojiambo RM. Are lifestyle shifts fuelling the obesity epidemic in urbanised Africans? *Glob Health  
10 Promot* 2016;23(4):73-75. doi: 10.1177/1757975915576306 [published Online First:  
11 2015/04/30]  
12 39. Vorster HH. The emergence of cardiovascular disease during urbanisation of Africans. *Public Health  
13 Nutr* 2002;5(1a):239-43. [published Online First: 2002/05/25]  
14 40. Ruotsalainen H, Kyngas H, Tammelin T, et al. Systematic review of physical activity and exercise  
15 interventions on body mass indices, subsequent physical activity and psychological symptoms  
16 in overweight and obese adolescents. *J Adv Nurs* 2015;71(11):2461-77. doi:  
17 10.1111/jan.12696 [published Online First: 2015/06/03]  
18 41. WHO. Global action plan on physical activity 2018-2030: More active people for a healthier world,  
19 2018.  
20 42. Alinia S, Hels O, Tetens I. The potential association between fruit intake and body weight--a review.  
21 *Obes Rev* 2009;10(6):639-47. doi: 10.1111/j.1467-789X.2009.00582.x [published Online First:  
22 2009/05/06]  
23 43. Ledoux TA, Hingle MD, Baranowski T. Relationship of fruit and vegetable intake with adiposity: a  
24 systematic review. *Obes Rev* 2011;12(5):e143-50. doi: 10.1111/j.1467-789X.2010.00786.x  
25 [published Online First: 2010/07/17]  
26 44. Lim SS, Vos T, Flaxman AD, et al. A comparative risk assessment of burden of disease and injury  
27 attributable to 67 risk factors and risk factor clusters in 21 regions, 1990-2010: a systematic  
28 analysis for the Global Burden of Disease Study 2010. *Lancet* 2012;380(9859):2224-60. doi:  
29 10.1016/s0140-6736(12)61766-8 [published Online First: 2012/12/19]  
30  
31  
32  
33  
34  
35  
36  
37  
38  
39  
40  
41  
42  
43  
44  
45  
46  
47  
48  
49  
50  
51  
52  
53  
54  
55  
56  
57  
58  
59  
60

**Supplementary Table 1: Characteristics of study participants by selected demographic, behavioural and biological risk factors**

| Variable                                              | Men<br>%(95% CI)<br>1611 | Women<br>%(95% CI)<br>1922 | Total<br>%(95% CI)<br>3533 |
|-------------------------------------------------------|--------------------------|----------------------------|----------------------------|
| <b>Gender</b>                                         |                          |                            |                            |
| Men                                                   |                          |                            | 50.2(47.6-52.9)            |
| Women                                                 |                          |                            | 49.8(47.1-52.4)            |
| <b>Age Group</b>                                      |                          |                            |                            |
| 25 -34                                                | 46.8(42.8-50.8)          | 45.9(42.8-49.1)            | 46.3(43.9-48.8)            |
| 35-44                                                 | 26.5(24.0-29.2)          | 27.0(24.3-29.8)            | 26.7(24.9-28.7)            |
| 45-54                                                 | 16.8(14.7-19.2)          | 17.6(15.7-19.6)            | 17.2(15.8-18.7)            |
| 55-64                                                 | 9.9(8.2-11.9)            | 9.6(7.5-12.1)              | 9.7(8.2-11.5)              |
|                                                       | P<0.937                  |                            |                            |
| <b>Mean age</b>                                       | 37.8(37.0-38.6)          | 37.6(36.8-38.3)            | 37.7(37.1-38.2)            |
| <b>Marital Status</b>                                 |                          |                            |                            |
| Never married                                         | 22.6(20.1-25.2)          | 7.3(5.7-9.4)               | 15.0(13.4-16.7)            |
| Married                                               | 66.4(59.8-72.3)          | 70.8(63.2-77.4)            | 68.6(61.9-74.6)            |
| Separated/divorced                                    | 2.3(1.7-3.3)             | 4.8(3.8-6.0)               | 3.5(2.9-4.4)               |
| Widowed                                               | 0.3(0.1-0.9)             | 5.5(4.2-7.3)               | 2.9(2.2-3.8)               |
| Cohabiting                                            | 8.4(4.3-15.9)            | 11.6(5.9-21.5)             | 10.0(5.2-18.5)             |
|                                                       | P<0.001                  |                            |                            |
| <b>Ethnicity</b>                                      |                          |                            |                            |
| Mandinka                                              | 42.1(36.9-47.6)          | 39.3(33.4-45.6)            | 40.7(35.6-46.0)            |
| Wolof                                                 | 16.2(12.1-21.4)          | 16.1(12.4-20.5)            | 16.2(12.5-20.7)            |
| Fula                                                  | 20.7(17.1-25.0)          | 18.5(15.1-22.4)            | 19.6(16.4-23.3)            |
| Jola                                                  | 12.2(8.2-17.8)           | 15.1(11.1-20.2)            | 13.6(9.8-18.6)             |
| Other                                                 | 8.7(6.6-11.5)            | 11.1(8.5-14.4)             | 9.9(7.8-12.5)              |
|                                                       | P=0.104                  |                            |                            |
| <b>Years spent in school</b>                          |                          |                            |                            |
| ≤6 Years                                              | 55.0(50.5-59.5)          | 74.3(69.4-78.6)            | 64.3(60.1-68.2)            |
| 7-12 Years                                            | 31.5(28.1-35.2)          | 22.4(18.7-26.6)            | 27.1(24.2-30.3)            |
| >12 Years                                             | 13.4(11.2-16.0)          | 3.4(2.3-4.9)               | 8.6(7.2-10.2)              |
|                                                       | P<0.001                  |                            |                            |
| <b>Residence (Local government area) <sup>a</sup></b> |                          |                            |                            |
| Banjul                                                | 7.8(2.5-21.9)            | 7.1(2.2-21.0)              | 7.5(2.4-20.7)              |
| KMC                                                   | 23.2(15.1-33.9)          | 28.2(18.9-39.8)            | 25.7(17.2-36.6)            |
| WCR                                                   | 35.7(24.3-48.8)          | 30.9(20.6-45.5)            | 33.3(22.6-46.0)            |
| LRR                                                   | 7.6(3.3-16.8)            | 7.9(3.4-17.6)              | 7.8(3.4-16.9)              |
| NBR                                                   | 8.2(4.4-14.6)            | 10.3(5.6-18.11)            | 9.2(5.1-16.3)              |
| CRRN                                                  | 2.5(0.7-8.9)             | 2.8(0.7-9.9)               | 2.7(0.7-9.4)               |
| CRRS                                                  | 6.1(2.5-14.2)            | 6.4(2.6-14.7)              | 6.3(2.6-14.2)              |
| URR                                                   | 8.9(4.1-18.2)            | 6.4(2.8-14.1)              | 7.7(3.5-16.0)              |
|                                                       | P=0.131                  |                            |                            |
| <b>Residence (Rurality)</b>                           |                          |                            |                            |
| Urban                                                 | 57.7(48.2-66.6)          | 56.8(47.8-65.4)            | 57.2(48.3-65.7)            |
| Semi urban                                            | 8.7(4.3-17.0)            | 6.8(3.1-14.4)              | 7.8(3.7-15.5)              |
| Rural                                                 | 33.6(27.4-40.5)          | 36.4(29.8-43.6)            | 35.0(28.9-41.7)            |
|                                                       | P=0.187                  |                            |                            |
| <b>Physical Activity <sup>b</sup></b>                 |                          |                            |                            |
| ≥600METS/week                                         | 88.9(84.0-92.5)          | 80.2(72.1-86.4)            | 84.6(78.2-89.3)            |
| < 600METS/week                                        | 11.1(7.5-16.1)           | 19.8(13.6-27.9)            | 15.4(10.7-21.8)            |
|                                                       | P<0.001                  |                            |                            |
| <b>Smoking</b>                                        |                          |                            |                            |
| Never smokers                                         | 57.3(52.3-62.1)          | 98.1(96.9-98.8)            | 77.6(74.2-80.6)            |

| Variable                                 | Men<br>%(95% CI)<br>1611 | Women<br>%(95% CI)<br>1922 | Total<br>%(95% CI)<br>3533 |
|------------------------------------------|--------------------------|----------------------------|----------------------------|
| Current smokers                          | 33.0(29.0-37.2)          | 1.2(0.7-1.8)               | 17.2(14.8-19.8)            |
| Ex-smokers                               | 9.8(7.7-12.4)            | 0.8(0.3-1.7)               | 5.3(4.1-6.9)               |
| <b>P&lt;0.001</b>                        |                          |                            |                            |
| <b>Servings of fruits and vegetables</b> |                          |                            |                            |
| ≥5 /day                                  | 24.0(18.2-30.9)          | 23.8(18.1-30.6)            | 23.9(18.4-30.4)            |
| < 5/day                                  | 76.0(69.1-81.9)          | 76.2(69.4-81.9)            | 76.1(69.6-81.6)            |
| P= 0.934                                 |                          |                            |                            |
| <b>BMI<sup>c</sup></b>                   |                          |                            |                            |
| Underweight                              | 56.2(50.8-61.4)          | 46.6(42.8-50.5)            | 51.4(47.6-55.2)            |
| Normal                                   | 9.7(7.6-12.4)            | 7.6(6.19.5)-               | 8.7(7.2-10.4)              |
| Overweight                               | 26.0(21.1-31.6)          | 28.8(25.8-31.9)            | 27.4(24.0-31.1)            |
| Obese                                    | 8.1(6.0-11.0)            | 17.0(14.7-19.7)            | 12.6(10.5-14.9)            |
| <b>P&lt;0.001</b>                        |                          |                            |                            |
| <b>Mean height (cm)</b>                  | 166.9(165.1-168.7)       | 160.5(159.5-161.5)         | 163.7(162.4-165.0)         |
| <b>Mean weight (kg)</b>                  | 65.2(64.1-66.3)          | 65.5(63.8-67.3)            | 65.4(64.2-66.5)            |
| <b>Mean BMI(kg/m<sup>2</sup>)</b>        | 23.6(23.1-24.1)          | 25.6(24.9-26.3)            | 24.6(24.1-25.1)            |
| <b>Waist circumference<sup>d</sup></b>   |                          |                            |                            |
| Normal                                   | 89.7(86.7-92.2)          | 54.2(47.4-60.7)            | 72.3(67.8-76.3)            |
| High                                     | 10.3(7.8-13.4)           | 45.9(39.3-52.6)            | 27.7(23.7-32.2)            |
| <b>Mean waist circumference</b>          | 72.1(65.1-75.0)          | 76.0(72.9-79.1)            | 74.0(71.1-76.9)            |
| <b>Waist-to-Hip Ratio<sup>e</sup></b>    |                          |                            |                            |
| Normal                                   | 83.2(79.4-86.4)          | 60.6(54.8-66.1)            | 72.1(68.1-75.8)            |
| High                                     | 16.8(13.6-20.6)          | 39.4(33.9-45.2)            | 27.9(24.2-31.9)            |
| <b>P&lt;0.001</b>                        |                          |                            |                            |
| <b>Waist-Height Ratio</b>                |                          |                            |                            |
| Normal (≤0.5)                            | 81.9(77.9-85.4)          | 59.9(53.2-66.3)            | 71.1(66.2-75.6)            |
| High (>0.5)                              | 18.1(14.6-22.1)          | 40.1(33.7-46.8)            | 28.9(24.4-33.8)            |
| <b>P&lt;0.001</b>                        |                          |                            |                            |
| <b>Mean Hip Circumference (cm)</b>       | 89.3(87.0-91.6)          | 94.2(92.1-96.3)            | 91.7(89.7-93.8)            |

Note: Data shown have been weighted for non-response and the analysis took into account the complex survey design.

<sup>a</sup> KM=Kanifing Municipality; WCR =West Coast Region; LRR= Lower River Region; NBR =North Bank Region; CRRN = Central River Region North, CRRS=Central River Region South; URR =Upper River Region

<sup>b</sup> METS =Metabolic equivalents

<sup>c</sup> BMI is categorised into underweight (BMI<18.5kg/m<sup>2</sup>), normal (18.5-24.9 Kg/m<sup>2</sup>), overweight (25.0-29.9kg/m<sup>2</sup>) and obese (BMI ≥30kg/m<sup>2</sup>).

<sup>d</sup> Based on the definition of the International Diabetes Federation (High waist circumference, indicating abdominal obesity defined as ≥90 cm in men or ≥80 cm in women)

<sup>e</sup> Based on the WHO definitions (high WHR defined as >0.90 in men and >85 in women)

NB: The p value indicates the statistical significance of the difference in proportions between men and women obtained using Pearson's chi-squared test



Supplementary Table 2: Prevalence of BMI categories by selected socio-demographic, behavioural and biological factors in men <sup>a, b, c</sup>

| Variable                            | Normal (desirable)<br>%(95% CI) | Underweight<br>%(95% CI) | Overweight<br>%(95% CI) | Obese<br>%(95% CI) | $\chi^2$<br>P value |
|-------------------------------------|---------------------------------|--------------------------|-------------------------|--------------------|---------------------|
| <b>Total</b>                        | 56.2(50.8-61.4)                 | 9.7(7.6-12.4)            | 26.0(21.1-31.6)         | 8.1(6.0-11.0)      |                     |
| <b>Age Group</b>                    |                                 |                          |                         |                    |                     |
| 25 -34                              | 59.0(52.2-65.6)                 | 11.6(8.4-15.9)           | 22.0(16.3-29.0)         | 7.3(4.9-10.7)      | <b>0.003</b>        |
| 35-44                               | 54.0(47.3-60.6)                 | 7.3(4.9-10.8)            | 32.4(25.7-39.8)         | 6.4(4.1-9.7)       |                     |
| 45-54                               | 48.7(40.5-56.9)                 | 9.3(5.7-14.8)            | 29.6(23.4-36.7)         | 12.4(8.8-17.3)     |                     |
| 55-64                               | 61.0(53.4-68.1)                 | 8.0(5.1-12.3)            | 21.8(16.0-29.0)         | 9.1(4.6-17.4)      |                     |
| <b>Marital status</b>               |                                 |                          |                         |                    |                     |
| Never married                       | 55.1(45.1-64.7)                 | 11.9(7.4-18.4)           | 24.3(16.0-35.2)         | 8.7(4.8-15.2)      | 0.222               |
| Married                             | 56.1(50.7-61.4)                 | 7.9(6.0-10.4)            | 27.7(23.1-32.9)         | 8.2(5.8-11.6)      |                     |
| Separated                           | 49.6(34.1-65.2)                 | 14.6(5.7-32.4)           | 32.1(19.4-48.0)         | 3.8(0.8-15.6)      |                     |
| Widowed                             | 63.3(17.6-93.3)                 | 36.8(6.7-82.4)           | 0.0                     | 0.0                |                     |
| Cohabiting                          | 60.4(48.7-71.0)                 | 16.3(8.6-29.0)           | 16.2(9.6-25.8)          | 7.1(3.5-13.9)      |                     |
| <b>Ethnicity</b>                    |                                 |                          |                         |                    |                     |
| Mandinka                            | 56.8(50.5-62.8)                 | 11.5(8.6-15.1)           | 25.5(19.1-33.1)         | 6.3(4.1-9.6)       | <b>0.042</b>        |
| Wolof                               | 46.8(38.0-55.8)                 | 10.8(6.2-17.9)           | 32.3(24.4-41.4)         | 10.2(6.2-16.4)     |                     |
| Fula                                | 59.1(50.8-66.9)                 | 8.4(5.3-13.1)            | 25.2(18.3-33.5)         | 7.3(4.2-12.2)      |                     |
| Jola                                | 62.6(52.8-71.4)                 | 8.2(4.7-14.1)            | 22.1(15.3-30.8)         | 7.1(3.5-13.9)      |                     |
| Others                              | 55.0(45.2-64.4)                 | 4.8(2.3-9.9)             | 23.8(16.0-33.7)         | 16.5(9.8-26.4)     |                     |
| <b>Residence (LGA) <sup>d</sup></b> |                                 |                          |                         |                    |                     |
| Banjul & KM                         | 33.4(25.4-42.8)                 | 3.2(1.7-6.0)             | 47.2(37.6-57.0)         | 16.2(11.0- 23.1)   | <b>&lt;0.001</b>    |
| WCR                                 | 68.5(63.5-73.2)                 | 15.3(11.7-19.7)          | 11.9(9.0-15.4)          | 4.4(2.9-6.6)       |                     |
| URR                                 | 49.6(38.9-60.3)                 | 4.2(2.0-8.6)             | 32.4(26.1-39.3)         | 13.8(8.9-20.9)     |                     |
| NBR                                 | 65.6(54.9-74.9)                 | 13.9(9.1-20.6)           | 19.1(13.0-27.1)         | 1.5(1.6-3.4)       |                     |
| CRR                                 | 67.1(54.1-77.9)                 | 15.5(9.6-23.9)           | 15.6(10.1-23.4)         | 1.9(0.7-4.4)       |                     |
| LRR                                 | 75.9(62.0-85.9)                 | 5.7(3.0-10.7)            | 17.9(8.5-34.0)          | 0.5(0.1-3.1)       |                     |
| <b>Residence (Rurality)</b>         |                                 |                          |                         |                    |                     |
| Urban                               | 49.1(41.2-57.1)                 | 9.2(6.2-13.5)            | 30.9(23.2-39.9)         | 10.7(7.4-15.4)     | <b>0.001</b>        |
| Semi urban                          | 54.1(40.1-67.5)                 | 8.4(3.3-19.5)            | 27.7(17.6-40.8)         | 9.8(4.7-19.1)      |                     |
| Rural                               | 68.8(62.6-74.3)                 | 10.9(8.1-14.6)           | 17.1(13.0-22.2)         | 3.2(1.8-5.6)       |                     |
| <b>Education level</b>              |                                 |                          |                         |                    |                     |
| No formal education                 | 59.4(54.4-64.1)                 | 9.3(7.1-12.0)            | 24.9(20.5-29.8)         | 6.5(4.6-9.3)       | <b>0.007</b>        |

| Variable                               | Normal (desirable)<br>%(95% CI) | Underweight<br>%(95% CI) | Overweight<br>%(95% CI) | Obese<br>%(95% CI) | $\chi^2$<br>P value |
|----------------------------------------|---------------------------------|--------------------------|-------------------------|--------------------|---------------------|
| Primary/ Middle                        | 61.3(51.9-69.9)                 | 13.4(8.3-21.0)           | 19.4(13.4-27.4)         | 5.9(3.0-11.2)      |                     |
| Secondary/Tertiary                     | 47.7(38.6-56.9)                 | 8.0(4.6-13.7)            | 32.1(23.6-42.1)         | 12.1(8.2-17.7)     |                     |
| <b>Years spent in school</b>           |                                 |                          |                         |                    |                     |
| ≤6 Years                               | 60.5(55.7-65.1)                 | 9.4(7.3-12.1)            | 23.7(19.6-28.3)         | 6.4(4.6-8.9)       | <b>0.003</b>        |
| 7-12 Years                             | 49.7(41.7-57.8)                 | 13.3(8.6-19.9)           | 27.9(20.1-37.2)         | 9.1(5.8-14.1)      |                     |
| >12 Years                              | 48.5(35.4-61.7)                 | 4.3(2.2-8.5)             | 34.3(24.8-45.3)         | 12.9(7.1-22.4)     |                     |
| <b>Smoking</b>                         |                                 |                          |                         |                    |                     |
| Never smokers                          | 53.1(46.8-59.3)                 | 7.0(5.1-9.7)             | 30.1(24.3-36.7)         | 9.8(6.8-13.8)      | <b>&lt;0.001</b>    |
| Current smokers                        | 61.6(54.8-68.1)                 | 13.8(11.0-17.3)          | 18.8(13.5-25.4)         | 5.8(3.9-8.7)       |                     |
| Ex-smokers                             | 55.5(46.8-63.9)                 | 11.8(6.7-20.0)           | 26.4(18.3-36.6)         | 6.3(3.2-12.1)      |                     |
| <b>Servings of fruits and vegs</b>     |                                 |                          |                         |                    |                     |
| ≥ 5/day                                | 61.8(54.1-68.8)                 | 9.1(6.5-12.7)            | 23.3(17.7-29.9)         | 5.8(3.5-9.6)       | 0.321               |
| < 5/day                                | 54.1(47.2-60.8)                 | 10.5(7.6-14.3)           | 27.8(21.5-35.1)         | 7.8(5.1-10.1)      |                     |
| <b>Physical Activity<sup>e</sup></b>   |                                 |                          |                         |                    |                     |
| <600METS/week                          | 46.5(36.3-57.0)                 | 4.7(2.3-9.4)             | 31.3(22.7-41.4)         | 17.5(11.5-25.7)    | <b>&lt;0.001</b>    |
| ≥600METS/week                          | 56.8(51.0-62.3)                 | 10.5(8.1-13.5)           | 25.7(20.2-32.0)         | 7.1(5.2-9.7)       |                     |
| <b>Waist circumference<sup>f</sup></b> |                                 |                          |                         |                    |                     |
| Normal                                 | 57.4(51.3-63.2)                 | 10.9(8.4-14.1)           | 24.2(18.6-30.7)         | 7.6(5.3-10.7)      | <b>&lt;0.001</b>    |
| High                                   | 43.2(34.4-52.4)                 | 1.5(0.5-4.7)             | 41.5(33.2-50.3)         | 13.8(8.8-21.6)     |                     |

Note: Data shown have been weighted for non-response and the analysis took into account the complex survey design.

<sup>a</sup> BMI is categorised into underweight (BMI<18.5kg/m<sup>2</sup>), normal (18.5-24.9 kg/m<sup>2</sup>), overweight (25.0-29.9kg/m<sup>2</sup>) and obese (BMI ≥30kg/m<sup>2</sup>).

<sup>b</sup> Results adjusted for complex survey design and weighted for non-response

<sup>c</sup> Row percentages are presented, i.e the prevalence of being in that BMI category for people with that socio-demographic and behavioural or biological characteristic

N= unweighted sample/observations

<sup>d</sup> KM= Kanifing Municipality; WCR =West Coast Region; URR =Upper River Region.; NBR =North Bank Region ; CRRS=Central River Region South ; CRRN = Central River Region North ; LRR= Lower River Region. Regions ordered from most to least urban

<sup>e</sup> METS =Metabolic equivalents

<sup>f</sup> Based on the definition of the International Diabetes Federation (High waist circumference, indicating abdominal obesity defined as ≥90 cm in men or ≥80 cm in women)



Supplementary Table 3: Prevalence of BMI categories by selected socio-demographic, behavioural and biological factors in women <sup>a, b, c</sup>

| Variable                            | Normal (desirable)<br>%(95% CI) | Underweight<br>%(95% CI) | Overweight<br>%(95% CI) | Obese<br>%(95% CI) | $\chi^2$<br>P value |
|-------------------------------------|---------------------------------|--------------------------|-------------------------|--------------------|---------------------|
| Total                               | 46.6(42.8-50.5)                 | 7.6(6.1-9.5)             | 28.8(25.8-31.9)         | 17.0(14.7-19.7)    |                     |
| <b>Age Group</b>                    |                                 |                          |                         |                    |                     |
| 25 -34                              | 51.6(46.9-56.2)                 | 8.3(6.3-10.9)            | 27.4(23.7-31.5)         | 12.8(10.0-16.2)    | <b>0.001</b>        |
| 35-44                               | 46.1(39.5-52.9)                 | 6.3(4.4-8.9)             | 28.5(22.9-34.8)         | 19.1(14.9-24.2)    |                     |
| 45-54                               | 43.3(35.9-51.0)                 | 6.4(3.8-10.5)            | 32.6(26.5-39.2)         | 17.7(12.5-24.4)    |                     |
| 55-64                               | 30.3(22.6-39.2)                 | 10.1(5.5-17.9)           | 29.3(20.3-40.4)         | 30.3(20.9-41.7)    |                     |
| <b>Marital status</b>               |                                 |                          |                         |                    |                     |
| Never married                       | 46.8(36.0-57.9)                 | 6.3(3.1-12.7)            | 36.2(26.4-47.2)         | 10.7(6.3-17.4)     | <b>0.001</b>        |
| Married                             | 46.6(42.3-51.0)                 | 6.9(5.2-9.1)             | 27.9(24.7-31.3)         | 18.6(15.8-21.8)    |                     |
| Separated                           | 32.5(22.5-44.4)                 | 9.6(4.5-19.2)            | 40.8(29.6-53.1)         | 17.1(9.3-29.5)     |                     |
| Widowed                             | 37.1(26.6-48.9)                 | 6.0(2.6-13.4)            | 30.4(21.0-41.8)         | 26.5(16.1-40.5)    |                     |
| Cohabiting                          | 57.6(46.8-67.6)                 | 12.5(7.9-19.2)           | 22.7(16.1-31.1)         | 7.3(4.8-10.7)      |                     |
| <b>Ethnicity</b>                    |                                 |                          |                         |                    |                     |
| Mandinka                            | 51.1(46.0-56.2)                 | 9.0(6.7-11.9)            | 26.4(22.6-30.7)         | 13.5(10.7-16.8)    | 0.066               |
| Wollof                              | 42.4(33.1-52.4)                 | 4.8(2.7-8.2)             | 29.3(22.7-36.9)         | 23.5(17.8-30.4)    |                     |
| Fula                                | 44.6(37.8-51.6)                 | 7.7(5.2-11.3)            | 31.7(26.5-37.4)         | 16.0(12.2-20.6)    |                     |
| Jola                                | 45.1(37.0-53.4)                 | 8.9(5.1-15.0)            | 26.4(20.0-33.9)         | 19.7(13.4-28.0)    |                     |
| Others                              | 42.5(32.4-53.3)                 | 4.8(2.8-8.1)             | 34.4(26.8-42.8)         | 18.3(12.5-26.1)    |                     |
| <b>Residence (LGA) <sup>d</sup></b> |                                 |                          |                         |                    |                     |
| Banjul & KM                         | 32.6(27.2-38.4)                 | 2.3(1.1-4.6)             | 38.8(33.1-44.8)         | 26.3(22.1-31.1)    | <b>&lt;0.001</b>    |
| WCR                                 | 49.8(42.8-56.7)                 | 11.4(8.1-15.7)           | 25.4(20.3-31.2)         | 13.5(10.0-18.1)    |                     |
| URR                                 | 53.9(45.9-61.6)                 | 9.5(4.7-18.2)            | 22.7(15.1-32.7)         | 13.9(8.5-21.8)     |                     |
| NBR                                 | 53.8(46.8-60.6)                 | 13.4(8.2-20.9)           | 20.9(16.0-26.8)         | 12.0(9.5-15.2)     |                     |
| CRR                                 | 67.3(51.3-80.1)                 | 7.5(5.0-11.0)            | 17.7(10.6-27.9)         | 7.6(3.1-17.1)      |                     |
| LRR                                 | 57.9(44.8-70.0)                 | 7.4(2.9-20.9)            | 25.6(17.1-36.3)         | 9.1(4.4-17.9)      |                     |
| <b>Residence (Rurality)</b>         |                                 |                          |                         |                    |                     |
| Urban                               | 38.0(33.1-43.2)                 | 5.1(3.3-7.7)             | 34.2(29.7-39.0)         | 22.7(19.3-26.6)    | <b>&lt;0.001</b>    |
| Semi urban                          | 43.5(37.5-49.7)                 | 4.2(2.8-6.3)             | 35.2(30.0-40.8)         | 17.1(13.8-21.1)    |                     |
| Rural                               | 60.6(54.9-66.1)                 | 12.1(9.3-15.6)           | 19.1(15.6-23.2)         | 8.1(6.1-10.6)      |                     |
| <b>Education level</b>              |                                 |                          |                         |                    |                     |
| No formal education                 | 49.5(45.3-53.7)                 | 7.6(5.9-9.9)             | 27.4(24.1-31.0)         | 15.6(12.9-18.4)    | <b>0.002</b>        |
| Primary/ Middle                     | 46.7(39.9-53.6)                 | 8.2(5.4-12.4)            | 27.2(21.6-33.7)         | 17.9(13.2-23.9)    |                     |

| Variable                               | Normal (desirable)<br>%(95% CI) | Underweight<br>%(95% CI) | Overweight<br>%(95% CI) | Obese<br>%(95% CI) | $\chi^2$<br>P value |
|----------------------------------------|---------------------------------|--------------------------|-------------------------|--------------------|---------------------|
| Secondary/Tertiary                     | 32.0(25.0-39.8)                 | 6.3(4.0-9.5)             | 37.9(30.8-45.5)         | 23.9(17.7-31.6)    |                     |
| <b>Years spent in school</b>           |                                 |                          |                         |                    |                     |
| ≤6 Years                               | 49.2(45.2-53.2)                 | 8.0(6.3-10.1)            | 26.9(23.8-30.3)         | 15.9(13.5-18.6)    | <b>0.012</b>        |
| 7-12 Years                             | 38.5(31.0-46.7)                 | 5.6(3.3-9.3)             | 35.5(28.8-43.0)         | 20.4(15.1-26.9)    |                     |
| >12 Years                              | 31.0(18.9-46.5)                 | 7.5(3.0-17.8)            | 41.5(26.7-57.9)         | 20.0(9.1-38.3)     |                     |
| <b>Servings of fruits and vegs</b>     |                                 |                          |                         |                    |                     |
| ≥ 5/day                                | 45.1(39.8-50.6)                 | 9.5(6.0-14.7)            | 27.9(22.7-33.8)         | 17.5(12.9-23.2)    | 0.621               |
| < 5/day                                | 46.2(41.3-51.3)                 | 7.0(5.2-9.4)             | 29.6(26.1-33.4)         | 17.2(14.5-20.3)    |                     |
| <b>Physical activity</b>               |                                 |                          |                         |                    |                     |
| <600METS/week                          | 39.0(32.6-45.8)                 | 5.7(3.2-9.9)             | 31.6(23.8-40.5)         | 23.7(18.4-30.1)    | <b>0.022</b>        |
| ≥600METS/week                          | 48.3(43.5-53.0)                 | 8.0(6.3-10.4)            | 28.0(24.9-31.3)         | 15.7(13.1-18.6)    |                     |
| <b>Waist circumference<sup>e</sup></b> |                                 |                          |                         |                    |                     |
| Normal                                 | 51.8(46.1-57.5)                 | 10.3(7.7-13.8)           | 24.5(20.1-29.3)         | 13.4(9.6-18.4)     | <b>&lt;0.001</b>    |
| High                                   | 39.7(34.2-45.4)                 | 4.7(3.1-7.1)             | 34.3(29.9-39.1)         | 21.3(17.8-25.2)    |                     |

Note: Data shown have been weighted for non-response and the analysis took into account the complex survey design.

<sup>a</sup> BMI is categorised into underweight (BMI<18.5Kg/m<sup>2</sup>), normal (18.5-24.9 Kg/m<sup>2</sup>), overweight (25.0-29.9Kg/m<sup>2</sup>) and obese (BMI ≥30Kg/m<sup>2</sup>).

<sup>b</sup> Results adjusted for complex survey design and weighted for non-response

<sup>c</sup> Row percentages are presented, i.e the prevalence of being in that BMI category for people with that socio-demographic, behavioural or biological characteristic

N= unweighted sample/observations

<sup>d</sup> KM= <sup>a</sup> KM=Kanifing Municipality; WCR =West Coast Region; URR =Upper River Region.; NBR =North Bank Region ; CRRS=Central River Region South ; CRRN = Central River Region North ; LRR= Lower River Region. Regions ordered from most to least urban

<sup>e</sup> METS =Metabolic equivalents

<sup>f</sup> Based on the definition of the International Diabetes Federation (High waist circumference, indicating abdominal obesity defined as ≥90 cm in men or ≥80 cm in women)

# BMJ Open

## The silent epidemic of obesity in The Gambia: Evidence from a nationwide population-based cross sectional health examination survey

|                                 |                                                                                                                                                                                                                                                                                                                                                                                                                                                                                                                                   |
|---------------------------------|-----------------------------------------------------------------------------------------------------------------------------------------------------------------------------------------------------------------------------------------------------------------------------------------------------------------------------------------------------------------------------------------------------------------------------------------------------------------------------------------------------------------------------------|
| Journal:                        | <i>BMJ Open</i>                                                                                                                                                                                                                                                                                                                                                                                                                                                                                                                   |
| Manuscript ID                   | bmjopen-2019-033882.R1                                                                                                                                                                                                                                                                                                                                                                                                                                                                                                            |
| Article Type:                   | Original research                                                                                                                                                                                                                                                                                                                                                                                                                                                                                                                 |
| Date Submitted by the Author:   | 28-Jan-2020                                                                                                                                                                                                                                                                                                                                                                                                                                                                                                                       |
| Complete List of Authors:       | Cham, Bai; Medical Research Council Unit The Gambia at the London School of Hygiene and Tropical Medicine; Department of Public Health, University of The Gambia<br>Scholes, Shaun; UCL, Dept of Epidemiology and Public Health<br>Ng Fat , Linda; University College London Research Department of Epidemiology and Public Health,<br>Badjie, Omar; Ministry of Health, The Gambia<br>Groce, Nora; University College London, Division of Epidemiology and Public Health<br>Mindell, Jennifer; UCL, Epidemiology & Public Health |
| <b>Primary Subject Heading</b>: | Epidemiology                                                                                                                                                                                                                                                                                                                                                                                                                                                                                                                      |
| Secondary Subject Heading:      | Global health, Public health                                                                                                                                                                                                                                                                                                                                                                                                                                                                                                      |
| Keywords:                       | Obesity, non-communicable diseases, sub-Saharan Africa, The Gambia, WHO STEP survey                                                                                                                                                                                                                                                                                                                                                                                                                                               |
|                                 |                                                                                                                                                                                                                                                                                                                                                                                                                                                                                                                                   |

SCHOLARONE™  
Manuscripts



I, the Submitting Author has the right to grant and does grant on behalf of all authors of the Work (as defined in the below author licence), an exclusive licence and/or a non-exclusive licence for contributions from authors who are: i) UK Crown employees; ii) where BMJ has agreed a CC-BY licence shall apply, and/or iii) in accordance with the terms applicable for US Federal Government officers or employees acting as part of their official duties; on a worldwide, perpetual, irrevocable, royalty-free basis to BMJ Publishing Group Ltd ("BMJ") its licensees and where the relevant Journal is co-owned by BMJ to the co-owners of the Journal, to publish the Work in this journal and any other BMJ products and to exploit all rights, as set out in our [licence](#).

The Submitting Author accepts and understands that any supply made under these terms is made by BMJ to the Submitting Author unless you are acting as an employee on behalf of your employer or a postgraduate student of an affiliated institution which is paying any applicable article publishing charge ("APC") for Open Access articles. Where the Submitting Author wishes to make the Work available on an Open Access basis (and intends to pay the relevant APC), the terms of reuse of such Open Access shall be governed by a Creative Commons licence – details of these licences and which [Creative Commons](#) licence will apply to this Work are set out in our licence referred to above.

Other than as permitted in any relevant BMJ Author's Self Archiving Policies, I confirm this Work has not been accepted for publication elsewhere, is not being considered for publication elsewhere and does not duplicate material already published. I confirm all authors consent to publication of this Work and authorise the granting of this licence.

1  
2  
3 **1 The silent epidemic of obesity in The Gambia: Evidence from a nationwide**  
4 **2 population-based cross-sectional health examination survey**  
5  
6  
7 3

8 4 Bai Cham,<sup>1,2,3\*</sup> Shaun Scholes<sup>3</sup>, Linda Ng Fat,<sup>3</sup> Omar Badjie,<sup>4</sup> Nora E Groce,<sup>3</sup> Jennifer S  
9 Mindell,<sup>3</sup>  
10

11 6 <sup>1</sup>Department of Public Health, University of The Gambia, Brikama Campus, The Gambia

12 7 <sup>2</sup>Medical Research Council Unit, The Gambia, Unit at the London School of Hygiene and Tropical  
13 8 Medicine

14 9 <sup>3</sup>Research Department of Epidemiology and Public Health, University College London, United  
15 10 Kingdom

16 11 <sup>4</sup>Non-Communicable Diseases Unit, Ministry of Health, The Gambia

17 12 \* Corresponding author: Medical Research Council Unit at the London School of Hygiene and  
18 13 Tropical Medicine, Atlantic Road Fajara, The Gambia

19 14 Email: [barhamcham@hotmail.com](mailto:barhamcham@hotmail.com)/ [bacham@mrc.gm](mailto:bacham@mrc.gm)  
20 15  
21 16  
22  
23  
24  
25  
26  
27  
28  
29  
30  
31  
32  
33  
34  
35  
36  
37  
38  
39  
40  
41  
42  
43  
44  
45  
46  
47  
48  
49  
50  
51  
52  
53  
54  
55  
56  
57  
58  
59  
60

1  
2  
3 17 **Abstract**

4  
5 18 **Objectives**

6 19 Non-communicable diseases account for 70% of global deaths; 80% occur in low- and  
7 20 middle-income countries. The rapid increase of obesity in sub-Saharan Africa is a concern.  
8 21 We assessed generalised- and abdominal-obesity and their associated risk factors among  
9 22 adults in The Gambia.  
10 23

11 24 **Design:** Nationwide cross-sectional health examination survey using WHO STEPwise  
12 25 survey methods.  
13 26

14 27 **Setting:** The Gambia.  
15 28

16 29 **Participants:** This study uses secondary analysis of a 2010 nationally-representative  
17 30 random sample of adults aged 25-64y (78% response rate). The target sample size was  
18 31 5280; 4111 responded. Analysis was restricted to non-pregnant participants with valid  
19 32 weight and height measurements (n=3533).  
20 33

21 34 **Primary and secondary outcome measures**

22 35 The primary outcome variable was generalised obesity, using WHO body mass index  
23 36 (BMI) thresholds. Analyses used non-response weighting and adjusted for the complex  
24 37 survey design. We conducted multinomial logistic regression analysis to identify factors  
25 38 associated with BMI categories. A secondary outcome variable was abdominal obesity  
26 39 defined as high waist circumference (using the International Diabetes Federation  
27 40 thresholds for Europeans).  
28 41

29 42 **Results**

30 43 Two-fifths of adults were overweight/obese, with a higher obesity prevalence in women  
31 44 (17%, 95%CI: 14.7-19.7; men 8%, 6.0-11.0). 10% of men and 8% of women were  
32 45 underweight. Urban residence (adjusted relative risk ratio (ARRR) 5.8, 95%CI 2.4-14.5),  
33 46 higher education (2.3, 1.2-4.5), older age, ethnicity, and low fruit and vegetable intake  
34 47 (2.8, 1.1-6.8) were strongly associated with obesity among men. Urban residence (4.7, 2.7-  
35 48 8.2), higher education (2.6, 1.1-6.4), older age and ethnicity were associated with obesity  
36 49 in women.  
37 50

38 51 **Conclusion**

39 52 There is a high burden of overweight/obesity in The Gambia. While obesity rates in rural  
40 53 areas were lower than in urban areas, obesity prevalence was higher among rural residents  
41 54 in this study compared with previous findings. Preventive strategies should be directed at  
42 55 raising awareness; discouraging harmful beliefs on weight; and promotion of healthy diets  
43 56 and physical activity.  
44 57  
45 58

46 59 **Key words:** Obesity, non-communicable diseases, sub-Saharan Africa, The Gambia, WHO  
47 60 STEP survey, health examination survey

1  
2  
3  
4 61  
5 62 Word count: Abstract = 295; Main document =3802  
6 63  
7  
8 64  
9

#### Strengths and limitations of this study

- Our study uses the most recent nationally-representative data on generalised and abdominal obesity among adults in The Gambia and hence it serves as a baseline study from which future changes in prevalence and risk factors can be assessed.
- The complex sampling strategy and the stringent WHO STEP protocols applied in collecting the data, particularly the use of objective anthropometric measurements taken by trained field staff, minimised biases.
- The study has identified population sub-groups to prioritise with health promotion measures.
- Our main limitation is the survey did not collect self-reported measures on beliefs about body size and weight management, which are important in The Gambian context to assess and monitor trends on beliefs and practices. We also had only one complete measure of socio-economic position (education) as missing information on income was high.

## 65 INTRODUCTION

66 Non-communicable diseases (NCDs) are increasing in sub-Saharan Africa (SSA),<sup>1 2</sup> NCDs  
67 account for 71% of all deaths globally. They also account for 15 million premature deaths  
68 among adults aged 30-69 years; 85% of these premature deaths occur in low- and middle-  
69 income countries.<sup>2</sup> A pooled analysis of 1698 population-based measurement studies  
70 comprising 19 million participants from 200 countries revealed an increasing trend of  
71 obesity globally.<sup>3</sup> If these trends continue, meeting the WHO global NCD target of halting  
72 the rise of obesity by 2025 is almost impossible.<sup>4</sup>

73  
74 A great concern is the rapid increase of obesity in SSA.<sup>1</sup> Countries in SSA face the  
75 challenge of the double burden of communicable and non-communicable diseases, and  
76 also the double burden of underweight/malnutrition and obesity.<sup>5 6 7</sup> A pooled analysis of  
77 population-based studies from 1980-2014 in Africa demonstrated a significant increase in  
78 age-standardised mean BMI across the continent.<sup>8</sup> A recent analysis of Demographic and  
79 Health Surveys conducted between 1991 and 2014 in 24 African countries revealed a  
80 significant increase in obesity among women; rates in some countries tripled.<sup>9</sup> There is  
81 evidence suggesting obesity is increasing more quickly in developing countries, especially  
82 in SSA, compared with developed countries.<sup>10 11</sup> This is associated with a range of factors,  
83 including epidemiological and nutritional transition; adoption of western life styles;  
84 decreased physical activity; low fruit and vegetable consumption; increased consumption  
85 of processed foods; and urbanisation.<sup>12-15</sup>

86  
87 Few studies on obesity have been conducted in The Gambia and most of them are either  
88 not nationally representative or are out of date. A study using data from 1942 to 1997 on  
89 the causes of death in The Gambian capital Banjul documented the double burden of non-



1  
2  
3 90 communicable diseases with communicable diseases exacerbated by malnutrition.<sup>16</sup> In a  
4  
5 91 nationwide assessment among Gambians aged 16 years and above in 1996, 18% were  
6  
7 92 underweight, 8% overweight and 2% obese.<sup>17</sup> A related study in urban and rural  
8  
9  
10 93 communities in The Gambia revealed that 18% of participants were underweight and 4%  
11  
12 94 were obese, with a higher prevalence of obesity (33%) among urban women aged 35 years  
13  
14 95 and above.<sup>18</sup> Both studies confirmed the persistence of the double burden of underweight  
15  
16 96 and overweight in The Gambia, although obesity prevalence was low (but increasing) in  
17  
18 97 those surveys.  
19  
20  
21  
22 98

23  
24 99 The double burden of communicable and non-communicable diseases poses a challenge to  
25  
26 100 governments and families in SSA; The Gambia is no exception. We recently demonstrated  
27  
28 101 a high prevalence of hypertension in The Gambia, with a greater burden in rural areas and  
29  
30 102 among adults classified as obese.<sup>19</sup> There is also a high prevalence of smoking among  
31  
32 103 Gambian men.<sup>20</sup> Moreover, these health risks have significant implications for wider  
33  
34 104 development concerns. It poses a barrier to poverty alleviation and can hinder the  
35  
36 105 attainment of the UN Sustainable Development Goals (SDGs), particularly Target 3.4,  
37  
38 106 which calls for a reduction in premature mortality due to NCDs by one-third by 2030.<sup>21 22</sup>  
39  
40 107 Halting the rise of obesity is also one of the WHO 2025 targets for the reduction of NCD  
41  
42 108 mortality.<sup>4</sup> Using the most recent nationally-representative data, including objective  
43  
44 109 anthropometric measurements, the aim of this study was to assess the burden of  
45  
46 110 underweight, overweight and obesity among adults (aged 25-64 years) in The Gambia.  
47  
48  
49  
50  
51  
52 111

## 112 **METHODS**

### 114 **Participants, sampling strategy and data collection**

115 Our study is based on secondary analysis of data from the most recent nationally–  
116 representative, population-based health examination survey conducted in The Gambia. The  
117 study setting and design, sampling, and research instruments have been previously  
118 described.<sup>19 20</sup> Briefly, data were collected from a random sample of adults aged 25-64  
119 years from January to March 2010 using the WHO STEPwise approach.<sup>19 23</sup> Participants  
120 were selected using a multi-stage stratified sampling technique based on the 2003  
121 population census of The Gambia. The country's eight local government areas (LGAs)  
122 served as strata for the sampling; 264 of the 408 enumeration areas (EAs) were then  
123 selected across the country and 20 households selected from each EA, both stages by  
124 simple random sampling. One eligible participant aged 25-64 years was sampled from  
125 each selected household, using the Kish Method. Sampled participants who were not  
126 reached after three or more visits and those who declined were not replaced. The target  
127 sample was set at 5280; 4111 responded (response rate 78%). Because of the complex  
128 sampling design, sample weights and post-stratification weights were applied to account  
129 for differences in the selection probability and to adjust for differences between the  
130 national age-sex distribution and that of the achieved sample.

131  
132 The anthropometric measurements were performed by field workers at the participant's  
133 residence. Weight, height and waist circumference were measured using WHO STEP  
134 protocols.<sup>23</sup> The measurements were conducted using standard scales with participants  
135 wearing light clothing, with foot- and head-wear removed. Weight was measured to the  
136 nearest 0.1kg using digital bathroom scales. Height was measured to the nearest 0.1cm in  
137 the standing position, using standard portable stadiometers. Waist circumference was

1  
2  
3 138 measured (once) to the nearest 0.1cm using a tape measure and was taken midway between  
4  
5 139 the lowest rib and the iliac crest.  
6  
7

8 140

#### 10 141 **Dependent/Outcome variables**

11  
12 142 The first outcome variable was generalised obesity, defined using body mass index (BMI)  
13  
14 143 calculated by dividing weight (in kg) by height squared ( $m^2$ ). We categorised BMI into  
15  
16 144 underweight ( $BMI < 18.5 kg/m^2$ ), normal/desirable weight ( $18.5-24.9 kg/m^2$ ), overweight  
17  
18 145 ( $25.0-29.9 kg/m^2$ ) and obese ( $BMI \geq 30 kg/m^2$ ), using the WHO thresholds.<sup>24</sup> We used  
19  
20 146 abdominal obesity (high waist circumference) as the second outcome variable, defined  
21  
22 147 using the International Diabetes Federation thresholds ( $\geq 90$  cm in men and  $\geq 80$  cm in  
23  
24 148 women).<sup>25</sup>  
25  
26  
27  
28

29 149

#### 30 150 **Independent covariates/predictor variables**

31  
32  
33 151 The predictor variables included sociodemographic and behavioural risk factors  
34  
35 152 including self-reported age-group, ethnicity, education (years of education:  $\leq 6$ ; 7-12;  $> 12$ ),  
36  
37 153 residence, fruit and vegetable intake, physical inactivity, and smoking (categories shown in  
38  
39 154 Table S1). There was a high amount of missing information on income and hence we used  
40  
41 155 level of education as a measure of socioeconomic position.  
42  
43  
44

45 156

#### 46 47 157 **Statistical analysis**

48  
49 158 The analytical sample was restricted to non-pregnant participants with valid weight and  
50  
51 159 height data ( $n=3533$ ). Figure 1 outlines the number of participants sampled, the number  
52  
53 160 excluded due to specific reasons, and the number included in the final analysis.  
54  
55  
56  
57  
58  
59  
60

1  
2  
3 161 Complete case analysis was performed as fewer than 1% of adults with valid weight and  
4  
5 162 height had missing information on other variables. In descriptive analyses, we summarised  
6  
7 163 the participants' sociodemographic characteristics as well as their behavioural risk factors.  
8  
9

10 164  
11  
12 165 The prevalence of BMI categories are reported as proportions with their corresponding  
13  
14 166 95% confidence intervals (CI). We conducted multivariable multinomial logistic  
15  
16 167 regression analysis to identify factors associated with being underweight, overweight and  
17  
18 168 obese separately, comparing each of these categories with the reference category of  
19  
20 169 normal/desirable weight. Sociodemographic and behavioural risk factors in the dataset that  
21  
22 170 are known or thought to be associated with obesity were included. We excluded smoking  
23  
24 171 (in women) and alcohol consumption (both sexes) from the regression models, due to their  
25  
26 172 low prevalence. However, model fit or adequacy was not assessed. Age-adjusted and fully-  
27  
28 173 adjusted relative risk ratios (ARRR), with their corresponding 95% CIs, are reported. All  
29  
30 174 analyses were stratified by gender, as we expected that the associations between the  
31  
32 175 predictors and outcomes may differ by gender.  
33  
34  
35  
36  
37  
38  
39

40 177 Due to the collinearity of the two variables on residence (i.e. local government area and  
41  
42 178 rurality), fully-adjusted models were repeated interchanging these variables. We explored  
43  
44 179 variables that could modify the association between BMI categories and the covariates by  
45  
46 180 fitting interaction terms. There was no evidence of modification (all  $p > 0.05$ ) and hence  
47  
48 181 multinomial regression models without interaction terms are reported. As in other studies,  
49  
50 182 we did not include abdominal obesity in the models for BMI because of the collinearity of  
51  
52 183 waist circumference and BMI.<sup>26</sup>  
53  
54  
55

56 184 We explored the factors associated with abdominal obesity (high waist circumference as  
57  
58 185 defined above) by conducting multivariable binary logistic regression analysis. BMI was  
59  
60

1  
2  
3 186 not included as a predictor in these models because of the aforementioned collinearity of  
4  
5 187 waist circumference and BMI. For abdominal obesity, age-adjusted (OR) and fully-  
6  
7 188 adjusted odds ratios (AOR) with corresponding 95% CI are reported.  
8  
9

10  
11 189 All analyses were weighted for non-response and adjusted for the complex survey design  
12  
13 190 in accordance with WHO STEP wise protocols. Analyses were performed using Stata V15  
14  
15 191 (StataCorp, College Station, Texas, USA). Ethical approval for the survey was obtained  
16  
17 192 from the National Ethics Committee of The Gambia; participants gave verbal or written  
18  
19 193 consent.  
20  
21

22 194

### 23 24 195 **Patient and Public Involvement**

25 196

26  
27  
28 197 Patients and the public were not directly involved in this study. However, the STEPwise  
29  
30 198 survey on which the data reported in this study is based was population-based. All the  
31  
32 199 interviews and anthropometric measurements were conducted at the participant's  
33  
34 200 residence. Prior to the survey, people were sensitised about the objectives of the survey  
35  
36 201 and its importance through radio, television, community meeting places, etc. Results from  
37  
38 202 the previous analyses have been shared. In addition, the results are used by the Ministry of  
39  
40 203 Health of The Gambia in their routine sensitisation campaigns. Like our previous  
41  
42 204 analyses,<sup>19 20</sup> the results of this study will be shared with the public and will also be used  
43  
44 205 to inform policy.  
45  
46  
47  
48

49 206  
50  
51  
52  
53  
54  
55  
56  
57  
58  
59  
60

## 207 **RESULTS**

### 208 **Characteristics of participants**

209 Descriptions of respondents' socio-demographic, behavioural risk factors and  
210 anthropometry data are presented in Table S1. The unadjusted mean age was 38.3±10.9  
211 years. More than two-fifths of the participants (44%) were in the youngest age-group (25-  
212 34 years), particularly among women (53% vs 33% of men). However, there was no age  
213 difference by gender after weighting and adjusting for the complex survey design  
214 (P=0.937, Table S1). The adjusted mean BMI was 24.6 kg/m<sup>2</sup> (95% CI 24.1-25.1) and the  
215 mean waist circumference was 74.0cm (71.1-76.9). Mean BMI and waist circumference  
216 were both higher among women: BMI in men 23.6 kg/m<sup>2</sup> (23.1-24.1kg/m<sup>2</sup>) vs 25.6kg/m<sup>2</sup>  
217 (24.9-26.3kg/m<sup>2</sup>) in women and waist circumference 72.1cm (65.1-75.0cm) in men  
218 compared with 76.0cm (72.9-79.1cm) in women.

### 220 **Prevalence of underweight, overweight and obesity**

221 The prevalence of BMI categories by selected socio-demographic and behavioural  
222 characteristics are presented for men and women in Tables S2 and S3 respectively. Among  
223 men, more than half had a normal/desirable weight (56%, 95% CI: 50.8-61.4%) and one in  
224 ten was underweight (10%, 7.6-12.4%). The prevalence of overweight and obesity in men  
225 were 26% (21.1-31.6%) and 8% (6.0-11.0%) respectively (Table S2). Almost a half of  
226 women were either overweight (29%, 25.8-31.9%) or obese (17%, 14.7-19.7%), while 8%  
227 (6.1-9.5%) were underweight (Table S3). Among both men and women, the prevalence of  
228 overweight and of obesity were substantially higher among urban residents; those with a  
229 higher level of education; and those physically inactive. More than 60% of the residents in  
230 the capital (Banjul) and the nearby towns (Kanifing Municipality) were either overweight  
231 or obese. Obesity was also high among never and ex-smokers in men. The prevalence of

1  
2  
3 232 abdominal obesity was 10% (95% CI: 7.8-13.4%) in men and 46% (95% CI: 39.3-52.6%)  
4  
5 233 in women (data not shown).  
6  
7  
8 234

9  
10 235 **Factors associated with underweight, overweight and obesity**  
11

12 236 Factors strongly associated with generalised obesity (versus normal/desirable weight) in  
13  
14 237 the multivariable multinomial logistic regressions included older age, ethnicity, higher  
15  
16  
17 238 education and urban residence among both men and women (Tables 1 and 2). Obesity was  
18  
19 239 also associated with low fruit and vegetable consumption (adjusted relative risk ratio  
20  
21 240 (ARRR) 2.8, 95% CI: 1.1-6.8) in men. All these variables with the exception of ethnicity  
22  
23 241 in men were also strongly associated with overweight (versus normal weight), while  
24  
25 242 current smoking was inversely associated with overweight (0.5, 0.4-0.7). Compared with  
26  
27 243 rural residents, the associations of overweight and obesity among urban residents were  
28  
29 244 three- and six-fold higher respectively in men (overweight 2.8, 1.5-5.0; obesity 5.8, 2.4-  
30  
31 245 14.5) and three- and five-fold higher in women (overweight 3.1, 1.9-5.0; obesity 4.7, 2.7-  
32  
33 246 8.2). Physical inactivity was strongly associated with obesity among both men and women  
34  
35 247 in the age-adjusted models but not in the fully-adjusted models, although the direction of  
36  
37 248 the association remained unchanged (Tables 1 and 2).  
38  
39  
40  
41  
42  
43  
44  
45  
46  
47  
48  
49  
50  
51  
52  
53  
54  
55  
56  
57  
58  
59  
60

249 **Table 1: Multinomial logistic regression on factors associated with being underweight, overweight or obese in men<sup>a</sup>**  
250

|                                         | Model I (Age adjusted)    |                           |                           | Model II (Fully adjusted)  |                            |                            |
|-----------------------------------------|---------------------------|---------------------------|---------------------------|----------------------------|----------------------------|----------------------------|
|                                         | Underweight <sup>b</sup>  | Overweight <sup>b</sup>   | Obese <sup>b</sup>        | Underweight <sup>b</sup>   | Overweight <sup>b</sup>    | Obese <sup>b</sup>         |
| Variable                                | RRR (95% CI) <sup>c</sup> | RRR (95% CI) <sup>c</sup> | RRR (95% CI) <sup>c</sup> | ARRR (95% CI) <sup>c</sup> | ARRR (95% CI) <sup>c</sup> | ARRR (95% CI) <sup>c</sup> |
| <b>Age-group</b>                        |                           |                           |                           |                            |                            |                            |
| 25-34                                   | Reference                 | Reference                 | Reference                 | Reference                  | Reference                  | Reference                  |
| 35-44                                   | 0.69(0.40-1.17)           | 1.61(1.22-2.12)***        | 0.95(0.56-1.62)           | 0.75(0.42-1.36)            | 2.00(1.38-2.90)***         | 1.58(0.75-3.33)            |
| 45-54                                   | 0.97(0.52-1.81)           | 1.63(1.06-2.52)*          | 2.06(1.22-3.48)**         | 1.31(0.66-2.59)            | 2.21(1.33-3.67)**          | 3.42(1.83-6.37)***         |
| 55-64                                   | 0.67(0.37-1.21)           | 0.96(0.59-1.56)           | 1.21(0.56-2.57)           | 0.81(0.43-1.52)            | 1.13(0.63-2.03)            | 2.88(1.22-6.80)**          |
| <b>Ethnicity</b>                        |                           |                           |                           |                            |                            |                            |
| Mandinka                                | Reference                 | Reference                 | Reference                 | Reference                  | Reference                  | Reference                  |
| Wollof                                  | 1.15(0.65-2.03)           | 1.48(0.93-2.35)           | 1.85(1.06-3.23)*          | 1.17(0.66-2.08)            | 1.34(0.83-2.18)            | 1.62(1.04-2.53)*           |
| Fula                                    | 0.71(0.41-1.24)           | 0.93(0.64-1.35)           | 1.09(0.49-2.39)           | 0.46(0.24-0.88)*           | 1.15(0.77-1.72)            | 0.80(0.34-1.87)            |
| Jola                                    | 0.67(0.38-1.18)           | 0.79(0.45-1.39)           | 1.05(0.45-2.45)           | 0.66(0.39-1.13)            | 1.03(0.56-1.89)            | 1.29(0.56-2.94)            |
| Others                                  | 0.44(0.19-1.04)           | 0.91(0.51-1.65)           | 2.56(1.26-5.20)**         | 0.37(0.14-0.96)*           | 0.92(0.45-1.88)            | 1.97(0.71-5.43)            |
| <b>Years spent in school</b>            |                           |                           |                           |                            |                            |                            |
| ≤6 Years                                | Reference                 | Reference                 | Reference                 | Reference                  | Reference                  | Reference                  |
| 7-12 Years                              | 1.19(0.76-1.87)           | 1.56(1.06-2.31)*          | 2.54(1.37-4.72)**         | 1.26(0.75-2.11)            | 1.28(0.81-2.01)            | 1.24(0.56-2.75)            |
| >12 Years                               | 0.48(0.23-1.00)           | 1.82(1.12-2.96)**         | 3.19(1.45-7.02)**         | 0.50(0.23-1.09)            | 1.66(1.02-2.71)*           | 2.29 (1.16-4.53)**         |
| <b>Residence (Rurality)</b>             |                           |                           |                           |                            |                            |                            |
| Rural                                   | Reference                 | Reference                 | Reference                 | Reference                  | Reference                  | Reference                  |
| Semi urban                              | 0.97(0.37-2.53)           | 2.05(0.95-4.43)           | 4.14(1.53-11.19)**        | 0.70(0.29-2.11)            | 1.62(0.70-3.80)            | 1.58(0.45-5.56)            |
| Urban                                   | 1.18(0.71-1.96)           | 2.52(1.49-4.27)***        | 5.03(2.20-11.47)***       | 1.35(0.81-2.23)            | 2.76(1.52-5.01)***         | 5.83(2.35-14.50)***        |
| <b>Smoking</b>                          |                           |                           |                           |                            |                            |                            |
| Never smokers                           | Reference                 | Reference                 | Reference                 | Reference                  | Reference                  | Reference                  |
| Current smokers                         | 1.71(1.18-2.48)**         | 0.53(0.38-0.74)***        | 0.52(0.32-0.84)***        | 1.48(0.97-2.27)            | 0.52(0.36-0.74)***         | 0.61(0.34-1.11)            |
| Ex-smokers                              | 1.71(0.97-3.02)           | 0.81(0.47-1.40)           | 0.58(0.26-1.32)           | 1.86(1.07-3.24)*           | 0.75(0.38-1.48)            | 0.58(0.21-1.63)            |
| <b>Servings of fruit and vegetables</b> |                           |                           |                           |                            |                            |                            |
| ≥ 5/day                                 | Reference                 | Reference                 | Reference                 | Reference                  | Reference                  | Reference                  |
| < 5/day                                 | 1.31(0.80-2.14)           | 1.38(0.86-2.22)           | 1.50(0.74-3.06)           | 1.38(0.79-2.38)            | 1.74(1.06-2.87)*           | 2.75(1.12-6.75)*           |
| <b>Physical Activity<sup>d</sup></b>    |                           |                           |                           |                            |                            |                            |
| ≥600METS/week                           | Reference                 | Reference                 | Reference                 | Reference                  | Reference                  | Reference                  |
| <600METS/week                           | 0.58(0.25-1.36)           | 1.46(0.86-2.48)           | 3.02(1.78-5.13)***        | 0.92(0.31-2.69)            | 1.20(0.53-2.73)            | 2.23 (0.87-5.70)           |

251 <sup>a</sup>Data shown have been weighted for non-response and the analysis took into account the complex survey design.252 <sup>b</sup>BMI is categorised into underweight (BMI<18.5kg/m<sup>2</sup>), normal/desirable weight (18.5-24.9 kg/m<sup>2</sup>, the reference group), overweight (25.0-29.9kg/m<sup>2</sup>) and obese (BMI  
253 ≥30kg/m<sup>2</sup>). Those with a desirable weight (normal) used as reference.



1 254 <sup>c</sup>RRR= Relative Risk Ratio adjusted for age (except for age group as the independent variable), ARRR= Fully Adjusted Relative Risk Ratio; Estimates in the fully  
2 255 adjusted models were mutually adjusted for the variables shown in the table  
3 256 <sup>d</sup>METS =Metabolic equivalents.  
4 257 \*p<0.05, \*\*p≤0.01, \*\*\* p≤0.001  
5 258

6  
7  
8  
9  
10  
11  
12  
13  
14  
15  
16  
17  
18  
19  
20  
21  
22  
23  
24  
25  
26  
27  
28  
29  
30  
31  
32  
33  
34  
35  
36  
37  
38  
39  
40  
41  
42  
43  
44  
45  
46

For peer review only

259 **Table 2: Multinomial logistic regression on factors associated with generalised underweight, overweight and obesity in women<sup>a</sup>**

| Variable                                 | Model I (Age adjusted)                               |                                                     |                                                | Model II (Fully adjusted)                              |                                                       |                                                  |
|------------------------------------------|------------------------------------------------------|-----------------------------------------------------|------------------------------------------------|--------------------------------------------------------|-------------------------------------------------------|--------------------------------------------------|
|                                          | Underweight <sup>b</sup><br>RRR(95% CI) <sup>c</sup> | Overweight <sup>b</sup><br>RRR(95% CI) <sup>c</sup> | Obese <sup>b</sup><br>RRR(95% CI) <sup>c</sup> | Underweight <sup>b</sup><br>ARRR (95% CI) <sup>c</sup> | Overweight <sup>b</sup><br>ARRR (95% CI) <sup>c</sup> | Obese <sup>b</sup><br>ARRR (95% CI) <sup>c</sup> |
| <b>Age-group</b>                         |                                                      |                                                     |                                                |                                                        |                                                       |                                                  |
| 25-34                                    | Reference                                            | Reference                                           | Reference                                      | Reference                                              | Reference                                             | Reference                                        |
| 35-44                                    | 0.85(0.55-1.31)                                      | 1.16(0.83-1.61)                                     | 1.67(1.10-2.54)*                               | 0.79(0.52-1.19)                                        | 1.37(0.93-2.01)                                       | 2.25(1.31-3.85)**                                |
| 45-54                                    | 0.92(0.50-1.71)                                      | 1.42(1.01-1.99)*                                    | 1.65(1.00-2.73)                                | 0.88(0.48-1.62)                                        | 1.98(1.33-2.96)***                                    | 2.66(1.43-4.94)**                                |
| 55-64                                    | 2.09(1.04-4.18)*                                     | 1.82(1.03-3.24)*                                    | 4.04(2.20-7.39)                                | 2.30(1.10-4.80)*                                       | 2.81(1.58-4.99)***                                    | 4.90(2.44-9.82)***                               |
| <b>Ethnicity</b>                         |                                                      |                                                     |                                                |                                                        |                                                       |                                                  |
| Mandinka                                 | Reference                                            | Reference                                           | Reference                                      | Reference                                              | Reference                                             | Reference                                        |
| Wollof                                   | 0.64(0.32-1.25)                                      | 1.31(0.80-2.16)                                     | 2.07(1.19-3.61)**                              | 0.69(0.36-1.29)                                        | 1.19(0.75-1.87)                                       | 1.50(0.90-2.48)                                  |
| Fula                                     | 1.03(0.60-1.78)                                      | 1.43(1.01-2.00)*                                    | 1.51(0.94-2.41)                                | 0.87(0.47-1.58)                                        | 1.69(1.20-2.38)**                                     | 1.78(1.09-2.92)*                                 |
| Jola                                     | 1.15(0.64-2.08)                                      | 1.14(0.72-1.82)                                     | 1.68(0.92-3.07)                                | 1.01(0.57-1.77)                                        | 0.98(0.64-1.51)                                       | 1.10(0.66-1.84)                                  |
| Others                                   | 0.63(0.31-1.27)                                      | 1.54(0.96-2.47)                                     | 1.57(0.84-2.92)                                | 0.34(0.14-0.80)**                                      | 1.33(0.78-2.28)                                       | 1.21(0.62-2.36)                                  |
| <b>Years spent in school</b>             |                                                      |                                                     |                                                |                                                        |                                                       |                                                  |
| ≤6 Years                                 | Reference                                            | Reference                                           | Reference                                      | Reference                                              | Reference                                             | Reference                                        |
| 7-12 Years                               | 0.10(0.58-1.69)                                      | 1.93(1.31-2.85)***                                  | 2.93(1.85-4.64)***                             | 1.12(0.63-1.99)                                        | 1.31(0.87-1.95)                                       | 1.67(1.00-2.77)*                                 |
| >12 Years                                | 1.37(0.46-4.14)                                      | 3.09(1.53-6.22)**                                   | 3.47(1.37-8.89)**                              | 1.93 (0.52-7.18)                                       | 2.40(1.10-5.20)*                                      | 2.58(1.05-6.36)*                                 |
| <b>Residence (Rurality)</b>              |                                                      |                                                     |                                                |                                                        |                                                       |                                                  |
| Rural                                    | Reference                                            | Reference                                           | Reference                                      | Reference                                              | Reference                                             | Reference                                        |
| Semi urban                               | 0.47(0.29-0.75)**                                    | 2.52(1.75-3.63)***                                  | 2.75(1.71-4.43)**                              | 0.54(0.31-0.95)*                                       | 2.31(1.46-3.65)***                                    | 2.25(1.22-4.14)**                                |
| Urban                                    | 0.68(0.41-1.13)                                      | 3.03(2.06-4.46)***                                  | 5.06(3.24-7.90)***                             | 0.84(0.46-1.55)                                        | 3.05(1.86-5.01)***                                    | 4.71(2.72-8.15)***                               |
| <b>Servings of fruits and vegetables</b> |                                                      |                                                     |                                                |                                                        |                                                       |                                                  |
| ≥ 5/day                                  | Reference                                            | Reference                                           | Reference                                      | Reference                                              | Reference                                             | Reference                                        |
| < 5/day                                  | 0.71(0.41-1.24)                                      | 1.03(0.73-1.46)                                     | 0.95(0.62-1.46)                                | 0.65(0.37-1.15)                                        | 1.10(0.73-1.66)                                       | 1.13(0.74-1.75)                                  |
| <b>Physical Activity<sup>d</sup></b>     |                                                      |                                                     |                                                |                                                        |                                                       |                                                  |
| ≥600METS/week                            | Reference                                            | Reference                                           | Reference                                      | Reference                                              | Reference                                             | Reference                                        |
| <600METS/week                            | 0.81(0.42-1.54)                                      | 1.32(0.83-2.11)                                     | 1.67(1.08-2.58)*                               | 1.19(0.58-2.44)                                        | 1.07(0.63-1.82)                                       | 1.02(0.55-1.91)                                  |

260 <sup>a</sup> Data have been weighted for non-response and the analysis took into account the complex survey design.  
261 <sup>b</sup>BMI is categorised into underweight (BMI<18.5kg/m<sup>2</sup>), normal/desirable weight (18.5-24.9 kg/m<sup>2</sup>, the reference group), overweight (25.0-29.9kg/m<sup>2</sup>) and obese (BMI  
262 ≥30kg/m<sup>2</sup>). Those with a desirable weight (normal) used as reference ;  
263 <sup>c</sup>RRR= Relative Risk Ratio adjusted for age (except for age group as the independent variable), ARRR= Fully Adjusted Relative Risk Ratio; Estimates in the fully  
264 adjusted models were mutually adjusted for all the variables shown in the table.  
265 <sup>d</sup> METS =Metabolic equivalents. \*p<0.05, \*\*p≤0.01, \*\*\* p≤0.001

1  
2  
3 266 No strong associations were found for underweight (versus normal/desirable weight) in  
4  
5 267 men except for an increased ARRR among ex-smokers (ARRR 1.9, 1.1-3.2) and an inverse  
6  
7 268 association with being Fula (0.5, 0.2-0.9) or minority ethnicity (0.4, 0.1-1.0) compared  
8  
9  
10 269 with being Mandinka (Table 1). Among women, the risk of being underweight (versus  
11  
12 270 normal weight) was higher among those aged 55-64 years compared with those aged 25-34  
13  
14 271 years (2.3, 95% CI: 1.1-4.8) and was inversely related with semi-urban residence  
15  
16 272 compared with rural residence (0.5, 0.3-1.0) and to minority ethnicity compared with  
17  
18 273 Mandinka (0.3, 0.1-0.8) (Table 2).  
19  
20  
21  
22  
23

274

### 275 **Factors associated with abdominal obesity**

276 In the fully-adjusted multivariable binary logistic regression model, older age, residence,  
277 low fruit and vegetable intake (men only) and being an ex-smoker compared with never  
278 smoking (men only) were strongly associated with higher odds of abdominal obesity  
279 (Table 3). Semi-urban residence (adjusted odds ratio (AOR) 0.4, 95% CI: 0.2-0.9)  
280 compared with rural residence, and low fruit and vegetable intake (0.6, 0.4-0.9) compared  
281 with the recommended intake of at least five servings a day, were inversely associated with  
282 the odds of abdominal obesity among men. Older age (3.2, 2.1-4.9) compared with  
283 younger age, and semi-urban residence (2.1, 1.2-3.7) compared with rural residence, were  
284 associated with higher odds of abdominal obesity among women (Table 3).

285

286 Table 3: Multivariate binary logistic regression on factors associated with high waist circumference (abdominal obesity)<sup>a</sup>

| Variable                                             | Men                                              |                                                    |                                                     | Women                                            |                                                    |                                                     |
|------------------------------------------------------|--------------------------------------------------|----------------------------------------------------|-----------------------------------------------------|--------------------------------------------------|----------------------------------------------------|-----------------------------------------------------|
|                                                      | Model I <sup>b</sup><br>OR (95% CI) <sup>c</sup> | Model II <sup>b</sup><br>AOR (95% CI) <sup>c</sup> | Model III <sup>b</sup><br>AOR (95% CI) <sup>c</sup> | Model I <sup>b</sup><br>OR (95% CI) <sup>c</sup> | Model II <sup>b</sup><br>AOR (95% CI) <sup>c</sup> | Model III <sup>b</sup><br>AOR (95% CI) <sup>c</sup> |
| <b>Age-group</b>                                     |                                                  |                                                    |                                                     |                                                  |                                                    |                                                     |
| 25-34                                                | Reference                                        | Reference                                          | Reference                                           | Reference                                        | Reference                                          | Reference                                           |
| 35-44                                                | 1.63(1.08-2.47)*                                 | 2.04(1.21-3.43)**                                  | 1.62(0.96-2.74)                                     | 2.06(1.52-2.80)***                               | 2.17 (1.60-2.92)***                                | 2.04(1.49-2.77)***                                  |
| 45-54                                                | 1.89(1.19-3.00)**                                | 2.50(1.41-4.43)**                                  | 1.97 (1.14-3.38)**                                  | 1.91(1.38-2.65)***                               | 1.91(1.34-2.72)***                                 | 1.91(1.33-2.74)***                                  |
| 55-64                                                | 2.26(1.36-3.75)**                                | 2.24(1.16-4.34)*                                   | 1.90(0.96-3.75)                                     | 3.57(2.32-5.49)***                               | 3.39(2.07-5.56)***                                 | 3.19(2.09-4.87)***                                  |
| <b>Ethnicity</b>                                     |                                                  |                                                    |                                                     |                                                  |                                                    |                                                     |
| Mandinka                                             | Reference                                        | Reference                                          | Reference                                           | Reference                                        | Reference                                          | Reference                                           |
| Wolof                                                | 1.12(0.43-2.90)                                  | 1.11(0.51-2.43)                                    | 1.06(0.40-2.78)                                     | 0.92(0.58-1.46)                                  | 1.01(0.64-1.58)                                    | 0.81(0.51-1.28)                                     |
| Fula                                                 | 0.96(0.49-1.91)                                  | 1.05(0.51-2.15)                                    | 0.90(0.45-1.76)                                     | 0.79(0.55-1.13)                                  | 0.82(0.55-1.21)                                    | 0.69(0.48-0.99)*                                    |
| Jola                                                 | 1.22(0.60-2.51)                                  | 0.86(0.41-1.80)                                    | 1.02(0.49-2.12)                                     | 0.94(0.62-1.42)                                  | 0.82(0.49-1.36)                                    | 0.97(0.62-1.53)                                     |
| Others                                               | 0.81(0.38-1.74)                                  | 0.71(0.30-1.67)                                    | 0.63(0.27-1.44)                                     | 0.58(0.33-1.01)                                  | 1.00(0.54-1.84)                                    | 0.74(0.43-1.28)                                     |
| <b>Years spent in school</b>                         |                                                  |                                                    |                                                     |                                                  |                                                    |                                                     |
| ≤6 Years                                             | Reference                                        | Reference                                          | Reference                                           | Reference                                        | Reference                                          | Reference                                           |
| 7-12 Years                                           | 0.96(0.58-1.59)                                  | 0.97(0.60-1.59)                                    | 0.86(0.50-1.46)                                     | 0.84(0.59-1.20)                                  | 1.10(0.78-1.55)                                    | 0.81(0.61-1.09)                                     |
| >12 Years                                            | 1.21(0.65-2.28)                                  | 1.25(0.68-2.31)                                    | 1.06(0.58-1.97)                                     | 0.75(0.32-1.76)                                  | 0.92(0.37-2.24)                                    | 0.82(0.32-2.06)                                     |
| <b>Residence (Local government area)<sup>d</sup></b> |                                                  |                                                    |                                                     |                                                  |                                                    |                                                     |
| LRR                                                  | Reference                                        | Reference                                          | -                                                   | Reference                                        | Reference                                          | -                                                   |
| CRR                                                  | 1.75(0.32-9.53)                                  | 1.92(0.44-8.32)                                    | -                                                   | 0.89(0.33-2.41)                                  | 1.20(0.45-3.18)                                    | -                                                   |
| NBR                                                  | 1.94(0.66-5.65)                                  | 1.63(0.55-4.85)                                    | -                                                   | 1.18(0.64-2.20)                                  | 1.08(0.57-2.06)                                    | -                                                   |
| URR                                                  | 0.08(0.01-0.65)**                                | 0.14(0.02-0.98)*                                   | -                                                   | 0.24(0.11-0.51)***                               | 0.26(0.11-0.65)**                                  | -                                                   |
| WCR                                                  | 2.66(1.02-6.96)                                  | 2.43(0.94-6.32)                                    | -                                                   | 1.62(0.83-3.15)                                  | 1.59(0.79-3.20)                                    | -                                                   |
| Banjul & KM                                          | 0.71(0.25-2.03)                                  | 0.71(0.24-2.07)                                    | -                                                   | 0.32(0.15-0.71)                                  | 0.37(0.14-1.00)                                    | -                                                   |
| <b>Residence (Rurality)</b>                          |                                                  |                                                    |                                                     |                                                  |                                                    |                                                     |
| Rural                                                | Reference                                        | -                                                  | Reference                                           | Reference                                        | -                                                  | Reference                                           |
| Semi urban                                           | 0.32(0.12-0.82)**                                | -                                                  | 0.36(0.15-0.90)*                                    | 1.53(0.75-3.10)                                  | -                                                  | 2.11(1.21-3.68)**                                   |
| Urban                                                | 0.89(0.45-1.75)                                  | -                                                  | 0.82(0.41-1.65)                                     | 0.82(0.49-1.37)                                  | -                                                  | 0.97(0.58-1.62)                                     |
| <b>Smoking<sup>e</sup></b>                           |                                                  |                                                    |                                                     |                                                  |                                                    |                                                     |
| Never smokers                                        | Reference                                        | Reference                                          | Reference                                           | -                                                | -                                                  | -                                                   |
| Current smokers                                      | 0.72(0.42-1.26)                                  | 0.49(0.28-0.86)**                                  | 0.60(0.35-1.03)                                     | -                                                | -                                                  | -                                                   |

| Variable                                | Men                                              |                                                    |                                                     | Women                                            |                                                    |                                                     |
|-----------------------------------------|--------------------------------------------------|----------------------------------------------------|-----------------------------------------------------|--------------------------------------------------|----------------------------------------------------|-----------------------------------------------------|
|                                         | Model I <sup>b</sup><br>OR (95% CI) <sup>c</sup> | Model II <sup>b</sup><br>AOR (95% CI) <sup>c</sup> | Model III <sup>b</sup><br>AOR (95% CI) <sup>c</sup> | Model I <sup>b</sup><br>OR (95% CI) <sup>c</sup> | Model II <sup>b</sup><br>AOR (95% CI) <sup>c</sup> | Model III <sup>b</sup><br>AOR (95% CI) <sup>c</sup> |
| Ex-smokers                              | 1.44(0.92-2.27)                                  | 1.24(0.81-1.91)                                    | 1.56(1.04-2.36)*                                    | -                                                | -                                                  | -                                                   |
| <b>Servings of fruit and vegetables</b> |                                                  |                                                    |                                                     |                                                  |                                                    |                                                     |
| ≥ 5/day                                 | Reference                                        | Reference                                          | Reference                                           | Reference                                        | Reference                                          | Reference                                           |
| < 5/day                                 | 0.63(0.40-0.99)*                                 | 0.61(0.37-1.01)                                    | 0.59(0.37-0.93)*                                    | 0.95(0.64-1.42)                                  | 0.86(0.50-1.49)                                    | 0.81(0.48-1.20)                                     |
| <b>Physical Activity<sup>f</sup></b>    |                                                  |                                                    |                                                     |                                                  |                                                    |                                                     |
| <600METS/week                           | Reference                                        | Reference                                          | Reference                                           | Reference                                        | Reference                                          | Reference                                           |
| ≥600METS/week                           | 0.78(0.37-1.63)                                  | 1.81(0.81-4.06)                                    | 1.52(0.65-3.57)                                     | 0.64(0.32-1.30)                                  | 1.46(0.81-2.62)                                    | 1.22(0.71-2.10)                                     |

287 Note: Data shown have been weighted for non-response and the analysis took into account the complex survey design.

288 <sup>a</sup>Based on the definition of the International Diabetes Federation (High waist circumference, indicating abdominal obesity, defined as ≥90cm in men and ≥80cm in women).

289 <sup>b</sup>Model I adjusted for age only; Model II adjusted for all variables except local government area; Model III adjusted for all variables except rurality.

290 <sup>c</sup>OR=odds ratio adjusted for age (except for age group as the independent variable); AOR= Adjusted odds ratio (fully adjusted)

291 <sup>d</sup>KM=Kanifing Municipality; WCR =West Coast Region; LRR= Lower River Region; NBR =North Bank Region; CRR = Central River Region; URR =Upper River Region

292 <sup>e</sup>Smoking status not included in the analyses for women due to the low prevalence.

293 <sup>f</sup>METS =Metabolic equivalents

294 \*p<0.05, \*\*p≤0.01, \*\*\* p≤0.001

295

1  
2  
3 296 **DISCUSSION**  
4

5 297 Using the most recent nationally-representative data, including objective anthropometric  
6  
7 298 measurements, the aim of this study was to assess the burden of underweight, overweight and  
8  
9 299 obesity among adults (aged 25-64 years) in The Gambia. This study has shown that the  
10  
11 300 burden of overweight and obesity is high in The Gambia, especially among women (29% and  
12  
13 301 17% respectively) and urban residents. No precise quantification of changes over time in  
14  
15 302 prevalence can be made since the only previous nationwide study was based on a different  
16  
17 303 age cohort.<sup>17</sup> Nevertheless, we can reasonably assume that the prevalence of obesity has  
18  
19 304 increased substantially in The Gambia within a period of less than 15 years. Almost half of  
20  
21 305 women and more than one-third of men aged 25-64 years were either overweight or obese in  
22  
23 306 2010 while the prevalence of overweight and obesity in 1996 were 8% and 2% respectively  
24  
25 307 among participants aged 16 years and above. The prevalence of underweight, however,  
26  
27 308 halved from 18% in 1996 to 9% in this study. This shows an increasing shift from  
28  
29 309 malnutrition/underweight to overweight and obesity among Gambian adults. These changes  
30  
31 310 reflect shifts in growing economic progress, modernization of household tasks, improved  
32  
33 311 transportation and increasing urbanization.  
34  
35  
36  
37  
38  
39  
40  
41

42 313 The prevalence of obesity in The Gambia is more than double the levels reported in similar  
43  
44 314 national WHO STEPwise surveys conducted in Malawi<sup>27</sup>, Eritrea<sup>28</sup> and Mozambique<sup>29 30</sup> but  
45  
46 315 is less than that reported in The Republic of Seychelles.<sup>31</sup> The high prevalence of obesity in  
47  
48 316 The Gambia is a cause for concern, given the increasing burden of NCDs, notably  
49  
50 317 hypertension.<sup>19</sup> Although higher in urban areas, generalised obesity is now a problem in both  
51  
52 318 urban and rural areas in The Gambia, in contrast to the evidence from previous studies.<sup>17 18</sup>  
53  
54 319 Despite the health risks associated with overweight/obesity, Gambians are culturally obesity  
55  
56 320 tolerant.<sup>32 33</sup> It has been well documented that perceptions of body weight vary across  
57  
58  
59  
60

1  
2  
3 321 different parts of the world.<sup>34 35</sup> In some parts of SSA, being overweight is not perceived as a  
4  
5 322 risk factor for NCDs but rather is perceived as a sign of beauty, wealth, success and prestige;  
6  
7 323 such cultural beliefs encourage obesity.<sup>34 35</sup> This is the case in The Gambia; a study on the  
8  
9 324 perception of body image and attractiveness among adults in urban areas in The Gambia  
10  
11 325 demonstrated high satisfaction with big body image (overweight), especially among  
12  
13 326 women.<sup>32</sup> A cross-cultural comparison using published data on Figure Rating Scales found  
14  
15 327 that Gambians' rating of a 'normal' weight were bigger than those of North Americans, and  
16  
17 328 that Gambians were more tolerant of obesity than white and African-Americans.<sup>32</sup> A related  
18  
19 329 study also conducted in The Gambia showed that weight gain was not associated with weight  
20  
21 330 concern, as 68% of those overweight and 37% of those obese did not perceive themselves to  
22  
23 331 be overweight/obese.<sup>33</sup> Findings from other SSA countries have indicated that women tend to  
24  
25 332 frame fatness as a symbol of wealth, as has been found for example, in Senegal<sup>36 37</sup> and in  
26  
27 333 Zambia.<sup>38</sup> Associating overweight/obesity with beauty and prestige/wealth renders the burden  
28  
29 334 of obesity a silent epidemic, as many people in The Gambia do not consider it a risk or want  
30  
31 335 to address it.  
32  
33  
34  
35  
36  
37  
38  
39

40 337 Our models showed that older age, ethnicity, higher education, and urban residence in both  
41  
42 338 genders, and low fruit and vegetable intake and smoking in men, were strongly associated  
43  
44 339 with the risks of overweight and obesity (versus normal/desirable weight). Evidence links  
45  
46 340 urbanisation and the increasing burden of obesity and other NCDs, especially in low-income  
47  
48 341 countries.<sup>39-42</sup> Higher education was also significantly associated with overweight and obesity  
49  
50 342 in our study. Highly educated adults in The Gambia are more likely to be in office jobs,  
51  
52 343 which are mostly sedentary. Physical inactivity was strongly associated with obesity in the  
53  
54 344 age-adjusted regression models among both men and women. However, this relationship  
55  
56 345 failed to attain statistical significance after full-adjustment for social and demographic  
57  
58  
59  
60

1  
2  
3 346 factors, suggesting that social and demographic factors may be confounding the age-adjusted  
4  
5 347 relationship between physical inactivity and obesity. Leisure-time physical activity was low  
6  
7 348 among the study participants; only 12% of adults in the present study reported engaging in  
8  
9 349 any form of leisure time activity: most of the physical activity reported was therefore work-  
10  
11 350 and transport-related. Judging from the data, participants with a higher level of education  
12  
13 351 therefore had lower levels of physical activity and hence were more prone to obesity. There is  
14  
15 352 evidence suggesting that increases in the level of physical activity and/or involvement in  
16  
17 353 exercise interventions - whether supervised or not - has a positive impact on BMI and overall  
18  
19 354 health.<sup>43</sup> Given our evidence that leisure time physical activity is low in The Gambia, the  
20  
21 355 Ministry of Health and Social Welfare of The Gambia and its stakeholders should promote  
22  
23 356 physical activity at the individual and population levels. As the promotion of physical  
24  
25 357 activity, especially at the population level, is multidisciplinary, it should be done in  
26  
27 358 collaboration with other government line ministries, municipalities, community-based  
28  
29 359 organisations and non-governmental organisations. The goal of the recent WHO Global  
30  
31 360 Action Plan on Physical Activity 2018-2030 ('more active people for a healthier world') is to  
32  
33 361 reduce the global prevalence of physical inactivity by 15% by 2030.<sup>44</sup> Our findings support  
34  
35 362 the advisability of the Ministry of Health of The Gambia incorporating this in its national  
36  
37 363 health policy and/or the NCDs policy and strategic plan.  
38  
39  
40  
41  
42  
43  
44  
45

46  
47 365 Low fruit and vegetable intake (defined as having fewer than five combined servings a day)  
48  
49 366 was associated with obesity in our study, especially among men. There is a strong linkage  
50  
51 367 between low fruit and vegetable consumption and increased NCD risk. Regular consumption  
52  
53 368 of fruits and vegetables may help prevent unhealthy weight gain, especially when taken as  
54  
55 369 part of a healthy diet.<sup>45 46</sup> A systematic analysis for the Global Burden of Diseases study in  
56  
57 370 2010 attributed more than 6 million deaths globally to inadequate consumption of fruits and  
58  
59  
60



1  
2  
3 371 vegetables.<sup>47</sup> An additional finding from our data was that the consumption of fruits and  
4  
5 372 vegetables was low; consumption of fruits and vegetables as part of healthy diets should  
6  
7 373 therefore be widely promoted. Future health examination surveys to monitor indicators such  
8  
9 374 as overweight/obesity in The Gambia should include a more comprehensive assessment of  
10  
11 375 diet (including unhealthy or fast food consumption) than that collected in the 2010 survey.  
12  
13  
14  
15 376

16  
17 377 Being an ex-smoker in men and older age in women, were positively associated with being  
18  
19 378 underweight (versus normal weight) in the fully-adjusted analyses presented here. Semi-  
20  
21 379 urban residents were less likely to be underweight (versus normal weight) compared with  
22  
23 380 rural residents. The association of underweight with being an ex-smoker might be at least  
24  
25 381 partly explained by the associations of both with ill-health. It is possible that ex-smokers  
26  
27 382 were advised to quit smoking because of their illness. Moreover, the association of  
28  
29 383 underweight with older age in women could also be associated with age-related illnesses.  
30  
31 384 Poverty, especially in rural areas, may explain the inverse association of underweight with  
32  
33 385 semi-urban compared with rural residence among women.  
34  
35  
36  
37  
38 386

39  
40 387 A potential positive finding from this study is that higher rates of obesity were found among  
41  
42 388 those with higher education and more urban based members of the population, the very  
43  
44 389 people who may be most effectively reached by public health campaigns.  
45  
46  
47  
48

#### 49 391 **Strengths and limitations of this study**

50  
51 392 This study presents the most recent nationally-representative data on obesity among adults in  
52  
53 393 The Gambia. It gives a better picture of the true burden of obesity in the country and hence  
54  
55 394 could serve as a baseline study from which future changes can be assessed. The complex  
56  
57 395 sampling strategy and the stringent WHO STEP protocols applied in collecting the data,  
58  
59  
60

1  
2  
3 396 particularly the use of objective measurements taken by trained field staff instead of a  
4  
5 397 reliance on self-reported anthropometric data, minimised biases.  
6  
7  
8 398

9  
10 399 Our main limitation is the cross-sectional nature of the study, which prevents attribution of  
11  
12 400 causality to the associations. However, it does identify population sub-groups to prioritise  
13  
14 401 with health promotion measures. There is a possibility of misclassifying obesity in people  
15  
16 402 who are physically active and have large muscle mass. For this reason we explored  
17  
18 403 abdominal obesity as an additional outcome variable. 3% of the participants who took part in  
19  
20 404 the physical measurements did not have valid weight and height measurements, which could  
21  
22 405 have led to non-response bias. However, we compared the two groups and there were no  
23  
24 406 systematic differences between those with and without valid anthropometric measurements  
25  
26 407 (data not shown). We had only one complete measure of socio-economic position (education) as  
27  
28 408 missing information on household income was high, a common finding in surveys. Therefore, we  
29  
30 409 were unable to estimate the associations between education and the outcome variables after  
31  
32 410 adjustment for income. Our findings could have been influenced by this, and other unmeasured  
33  
34 411 confounders such as fast food intake.  
35  
36  
37  
38  
39 412

40  
41 413 Currently, there is no standard threshold for high waist circumference in sub-Saharan Africa but the  
42  
43 414 International Diabetes Federation recommends using the thresholds for Europeans ( $\geq 94$  cm in men;  
44  
45 415  $\geq 80$  cm in women) for adults in SSA.<sup>25</sup> However, a study that utilised data from different countries  
46  
47 416 as part of the Africa Partnerships for Chronic Diseases Research revealed optimal waist  
48  
49 417 circumference cut-off-point for identifying men at increased cardiometabolic risk is lower ( $\geq 81.2$  cm)  
50  
51 418 than current guidelines for men in SSA, and similar to that of women.<sup>48</sup> We therefore used the  
52  
53 419 International Diabetes Federation thresholds for Asians ( $\geq 90$  cm in men;  $\geq 80$  cm in women).<sup>25</sup>  
54  
55 420 The data shown on waist-circumference levels may therefore be under- or over-estimated compared to  
56  
57 421 alternative thresholds for abdominal obesity. Finally, the survey did not collect information on  
58  
59  
60

1  
2  
3 422 beliefs about body size and weight management, which are important in The Gambian  
4  
5 423 context to assess and monitor trends on beliefs and practices.  
6  
7  
8 424

9  
10 425 **CONCLUSION**

11  
12 426 This study reveals a high prevalence of obesity among Gambian adults, while the burden of  
13  
14 427 underweight in this population may be decreasing. There are likely to be socio-cultural norms  
15  
16 428 that promote overweight, especially among women. Preventive strategies should be directed  
17  
18 429 at raising awareness of the importance of achieving and maintaining a healthy weight;  
19  
20 430 discouraging harmful socio-cultural practices and beliefs about weight; and the promotion of  
21  
22 431 healthy diets and regular physical activity during leisure-time, particularly in urban areas and  
23  
24 432 among women.  
25  
26  
27  
28

29 433  
30  
31  
32  
33  
34  
35  
36  
37  
38  
39  
40  
41  
42  
43  
44  
45  
46  
47  
48  
49  
50  
51  
52  
53  
54  
55  
56  
57  
58  
59  
60

1  
2  
3 434 **Acknowledgements.**  
4

5 435 We thank the WHO for their technical and financial support to conduct the survey and the  
6 436 Ministry of Health of The Gambia for the authorisation to use the data. The first author  
7 437 thanks the Islamic Development Bank (IDB) for funding his PhD research at UCL  
8 438 (University College London).  
9

10  
11 439 **Conflict of interest**

12  
13 440 The authors have no conflict of interest to declare.

14  
15 441 **Funding**

16 442 Bai Cham's PhD was funded by the Islamic Development Bank but no funding was received  
17 443 to work on this manuscript.

18  
19 444 **Author Contributions**

20  
21 445 BC conceptualised the paper, analysed the data and wrote the first draft of the manuscript.  
22 446 J.S.M, SS, N.E.G and L.N.F revised the work critically for important academic content. OB  
23 447 supervised the survey data collection process and contributed in the revision of the  
24 448 manuscript. All the authors approve the final version of the manuscript.  
25  
26

27 449 **Data Availability**

28  
29 450 The Gambia 2010 WHO STEP data is not publicly available but can be obtained from a third  
30 451 party upon request.  
31

32 452 **Figure legend**

33 453  
34 454 Figure 1: Flow diagram of study participants with number excluded and  
35 455 reason for exclusion  
36  
37  
38  
39  
40  
41  
42  
43  
44  
45  
46  
47  
48  
49  
50  
51  
52  
53  
54  
55  
56  
57  
58  
59  
60

1  
2  
3 460 **References**  
4  
5

- 6 461 1. Dalal S, Beunza JJ, Volmink J, et al. Non-communicable diseases in sub-Saharan Africa: what we  
7 462 know now. *International Journal of Epidemiology* 2011;40(4):885-901. doi:  
8 463 10.1093/ije/dyr050  
9 464 2. WHO. Noncommunicable diseases Factsheet 2019 [updated 10/01/2020; cited 2020 10/01/2020].  
10 465 Available from: <http://www.who.int/mediacentre/factsheets/fs355/en/>.  
11 466 3. NCD Risk Factor Collaboration. Trends in adult body-mass index in 200 countries from 1975 to 2014:  
12 467 a pooled analysis of 1698 population-based measurement studies with 19· 2 million  
13 468 participants. *The Lancet* 2016;387(10026):1377-96.  
14 469 4. WHO. Global action plan for the prevention and control of noncommunicable diseases 2013-2020,  
15 470 2013.  
16 471 5. Boutayeb A. The double burden of communicable and non-communicable diseases in developing  
17 472 countries. *Trans R Soc Trop Med Hyg* 2006;100(3):191-9. doi: 10.1016/j.trstmh.2005.07.021  
18 473 [published Online First: 2005/11/09]  
19 474 6. Nyirenda MJ. Non-communicable diseases in sub-Saharan Africa: understanding the drivers of the  
20 475 epidemic to inform intervention strategies. *Int Health* 2016;8(3):157-8. doi:  
21 476 10.1093/inthealth/ihw021 [published Online First: 2016/05/15]  
22 477 7. Popkin BM, Corvalan C, Grummer-Strawn LM. Dynamics of the double burden of malnutrition and  
23 478 the changing nutrition reality. *Lancet (London, England)* 2020;395(10217):65-74. doi:  
24 479 10.1016/s0140-6736(19)32497-3 [published Online First: 2019/12/20]  
25 480 8. NCD Risk Factor Collaboration –Africa Working Group. Trends in obesity and diabetes across Africa  
26 481 from 1980 to 2014: an analysis of pooled population-based studies. *International journal of*  
27 482 *epidemiology* 2017;46(5):1421-32.  
28 483 9. Amugsi DA, Dimbuene ZT, Mberu B, et al. Prevalence and time trends in overweight and obesity  
29 484 among urban women: an analysis of demographic and health surveys data from 24 African  
30 485 countries, 1991-2014. *BMJ Open* 2017;7(10):e017344. doi: 10.1136/bmjopen-2017-017344  
31 486 [published Online First: 2017/10/29]  
32 487 10. Popkin BM, Slining MM. New dynamics in global obesity facing low- and middle-income countries.  
33 488 *Obes Rev* 2013;14 Suppl 2:11-20. doi: 10.1111/obr.12102 [published Online First: 2013/10/10]  
34 489 11. Owolabi EO, Ter Goon D, Adeniyi OV. Central obesity and normal-weight central obesity among  
35 490 adults attending healthcare facilities in Buffalo City Metropolitan Municipality, South Africa: a  
36 491 cross-sectional study. *J Health Popul Nutr* 2017;36(1):54. doi: 10.1186/s41043-017-0133-x  
37 492 [published Online First: 2017/12/29]  
38 493 12. Ojofeitimi E, Adeyeye A, Fadiora A, et al. Awareness of obesity and its health hazard among women  
39 494 in a university community. *Pakistan Journal of Nutrition* 2007;6(5):502-05.  
40 495 13. Doku DT, Neupane S. Double burden of malnutrition: increasing overweight and obesity and stall  
41 496 underweight trends among Ghanaian women. *BMC Public Health* 2015;15:670. doi:  
42 497 10.1186/s12889-015-2033-6 [published Online First: 2015/07/17]  
43 498 14. Biadgilign S, Mgutshini T, Haile D, et al. Epidemiology of obesity and overweight in sub-Saharan  
44 499 Africa: a protocol for a systematic review and meta-analysis. *BMJ Open* 2017;7(11):e017666.  
45 500 doi: 10.1136/bmjopen-2017-017666 [published Online First: 2017/11/28]  
46 501 15. Bosu WK. An overview of the nutrition transition in West Africa: implications for non-  
47 502 communicable diseases. *Proc Nutr Soc* 2015;74(4):466-77. doi: 10.1017/s0029665114001669  
48 503 [published Online First: 2014/12/23]  
49 504 16. van der Sande MA, Inskip HM, Jaiteh KO, et al. Changing causes of death in the West African town  
50 505 of Banjul, 1942-97. *Bull World Health Organ* 2001;79(2):133-41. [published Online First:  
51 506 2001/03/13]  
52 507 17. van der Sande MAB, Bailey R, Faal H, et al. Nationwide prevalence study of hypertension and  
53 508 related non-communicable diseases in The Gambia. *Tropical Medicine & International Health*  
54 509 1997;2(11):1039-48. doi: DOI 10.1046/j.1365-3156.1997.d01-184.x

1  
2  
3  
4  
5  
6  
7  
8  
9  
10  
11  
12  
13  
14  
15  
16  
17  
18  
19  
20  
21  
22  
23  
24  
25  
26  
27  
28  
29  
30  
31  
32  
33  
34  
35  
36  
37  
38  
39  
40  
41  
42  
43  
44  
45  
46  
47  
48  
49  
50  
51  
52  
53  
54  
55  
56  
57  
58  
59  
60

18. van der Sande MAB, Ceasay SM, Milligan PJM, et al. Obesity and undernutrition and cardiovascular risk factors in rural and urban Gambian communities. *American Journal of Public Health* 2001;91(10):1641-44.
19. Cham B, Scholes S, Ng Fat L, et al. Burden of hypertension in The Gambia: evidence from a national World Health Organization (WHO) STEP survey. *Int J Epidemiol* 2018;47(3):860-71. doi: 10.1093/ije/dyx279 [published Online First: 2018/02/03]
20. Cham B, Scholes S, Groce NE, et al. Prevalence and Predictors of Smoking among Gambian Men: A Cross-Sectional National WHO STEP Survey. *International journal of environmental research and public health* 2019;16(23):4719.
21. Clark H. NCDs: a challenge to sustainable human development. *Lancet (London, England)* 2013;381(9866):510-1. doi: 10.1016/s0140-6736(13)60058-6 [published Online First: 2013/02/16]
22. Lal P, Jacob A, Buragohain A. UN Development Programme and non-communicable diseases. *Lancet (London, England)* 2013;382(9889):305. doi: 10.1016/s0140-6736(13)61628-1 [published Online First: 2013/07/31]
23. WHO. STEPS: A framework for surveillance: The WHO STEPwise approach to Surveillance of non-communicable diseases (STEPS), 2003.
24. WHO. Obesity: preventing and managing the global epidemic. Report of a WHO Consultation. WHO Technical Report Series 894, 2000.
25. International Diabetes Federation. The IDF consensus worldwide definition of the Metabolic Syndrome. Brussels 2006.
26. Han TS, van Leer EM, Seidell JC, et al. Waist circumference action levels in the identification of cardiovascular risk factors: prevalence study in a random sample. *Bmj* 1995;311(7017):1401-5. [published Online First: 1995/11/25]
27. Msyamboza KP, Kathyola D, Dzowela T. Anthropometric measurements and prevalence of underweight, overweight and obesity in adult Malawians: nationwide population based NCD STEPS survey. *Pan Afr Med J* 2013;15:108. doi: 10.11604/pamj.2013.15.108.2622 [published Online First: 2013/11/19]
28. Mufunda J, Mebrahtu G, Usman A, et al. The prevalence of hypertension and its relationship with obesity: results from a national blood pressure survey in Eritrea. *J Hum Hypertens* 2006;20(1):59-65. doi: 10.1038/sj.jhh.1001924 [published Online First: 2005/09/10]
29. Gomes A, Damasceno A, Azevedo A, et al. Body mass index and waist circumference in Mozambique: urban/rural gap during epidemiological transition. *Obes Rev* 2010;11(9):627-34. doi: 10.1111/j.1467-789X.2010.00739.x [published Online First: 2010/04/22]
30. Damasceno A, Azevedo A, Silva-Matos C, et al. Hypertension prevalence, awareness, treatment, and control in Mozambique: urban/rural gap during epidemiological transition. *Hypertension* 2009;54(1):77-83. doi: 10.1161/hypertensionaha.109.132423 [published Online First: 2009/05/28]
31. Faeh D, William J, Tappy L, et al. Prevalence, awareness and control of diabetes in the Seychelles and relationship with excess body weight. *BMC Public Health* 2007;7:163. doi: 10.1186/1471-2458-7-163 [published Online First: 2007/07/21]
32. Siervo M, Grey P, Nyan OA, et al. A pilot study on body image, attractiveness and body size in Gambians living in an urban community. *Eat Weight Disord* 2006;11(2):100-9. [published Online First: 2006/07/01]
33. Siervo M, Grey P, Nyan OA, et al. Urbanization and obesity in The Gambia: a country in the early stages of the demographic transition. *Eur J Clin Nutr* 2006;60(4):455-63. doi: 10.1038/sj.ejcn.1602337 [published Online First: 2005/11/25]
34. Gele AA, Mbalilaki AJ. Overweight and obesity among African immigrants in Oslo. *BMC Res Notes* 2013;6:119. doi: 10.1186/1756-0500-6-119 [published Online First: 2013/03/28]
35. Scott A, Ejikeme CS, Clottey EN, et al. Obesity in sub-Saharan Africa: development of an ecological theoretical framework. *Health promotion international* 2012:das038.



- 1  
2  
3 561 36. Holdsworth M, Gartner A, Landais E, et al. Perceptions of healthy and desirable body size in urban  
4 562 Senegalese women. *Int J Obes Relat Metab Disord* 2004;28(12):1561-8. doi:  
5 563 10.1038/sj.ijo.0802739 [published Online First: 2004/07/28]  
6 564 37. Macia E, Cohen E, Gueye L, et al. Prevalence of obesity and body size perceptions in urban and  
7 565 rural Senegal: new insight on the epidemiological transition in West Africa. *Cardiovasc J Afr*  
8 566 2017;28(5):324-30. doi: 10.5830/cvja-2017-034 [published Online First: 2017/10/31]  
9 567 38. Tateyama Y, Musumari PM, Techasrivichien T, et al. Dietary habits, body image, and health service  
10 568 access related to cardiovascular diseases in rural Zambia: A qualitative study. *PLoS One*  
11 569 2019;14(2):e0212739. doi: 10.1371/journal.pone.0212739 [published Online First:  
12 570 2019/02/23]  
13 571 39. Godfrey R, Julien M. Urbanisation and health. *Clin Med (Lond)* 2005;5(2):137-41. [published Online  
14 572 First: 2005/04/26]  
15 573 40. Kruger HS, Venter CS, Vorster HH. Obesity in African women in the North West Province, South  
16 574 Africa is associated with an increased risk of non-communicable diseases: the THUSA study.  
17 575 Transition and Health during Urbanisation of South Africans. *Br J Nutr* 2001;86(6):733-40.  
18 576 [published Online First: 2001/12/26]  
19 577 41. Ojiambo RM. Are lifestyle shifts fuelling the obesity epidemic in urbanised Africans? *Glob Health*  
20 578 *Promot* 2016;23(4):73-75. doi: 10.1177/1757975915576306 [published Online First:  
21 579 2015/04/30]  
22 580 42. Vorster HH. The emergence of cardiovascular disease during urbanisation of Africans. *Public Health*  
23 581 *Nutr* 2002;5(1a):239-43. [published Online First: 2002/05/25]  
24 582 43. Ruotsalainen H, Kyngas H, Tammelin T, et al. Systematic review of physical activity and exercise  
25 583 interventions on body mass indices, subsequent physical activity and psychological symptoms  
26 584 in overweight and obese adolescents. *J Adv Nurs* 2015;71(11):2461-77. doi:  
27 585 10.1111/jan.12696 [published Online First: 2015/06/03]  
28 586 44. WHO. Global action plan on physical activity 2018-2030: More active people for a healthier world,  
29 587 2018.  
30 588 45. Alinia S, Hels O, Tetens I. The potential association between fruit intake and body weight--a review.  
31 589 *Obes Rev* 2009;10(6):639-47. doi: 10.1111/j.1467-789X.2009.00582.x [published Online First:  
32 590 2009/05/06]  
33 591 46. Ledoux TA, Hingle MD, Baranowski T. Relationship of fruit and vegetable intake with adiposity: a  
34 592 systematic review. *Obes Rev* 2011;12(5):e143-50. doi: 10.1111/j.1467-789X.2010.00786.x  
35 593 [published Online First: 2010/07/17]  
36 594 47. Lim SS, Vos T, Flaxman AD, et al. A comparative risk assessment of burden of disease and injury  
37 595 attributable to 67 risk factors and risk factor clusters in 21 regions, 1990-2010: a systematic  
38 596 analysis for the Global Burden of Disease Study 2010. *Lancet (London, England)*  
39 597 2012;380(9859):2224-60. doi: 10.1016/s0140-6736(12)61766-8 [published Online First:  
40 598 2012/12/19]  
41 599 48. Ekoru K, Murphy G, Young E, et al. Deriving an optimal threshold of waist circumference for  
42 600 detecting cardiometabolic risk in sub-Saharan Africa. *International Journal of Obesity*  
43 601 2018;42(3):487-94.  
44  
45  
46  
47  
48  
49  
50 602  
51  
52  
53  
54  
55  
56  
57  
58  
59  
60

**Figure 1: Flow diagram of study participants with number excluded and reason for exclusion**

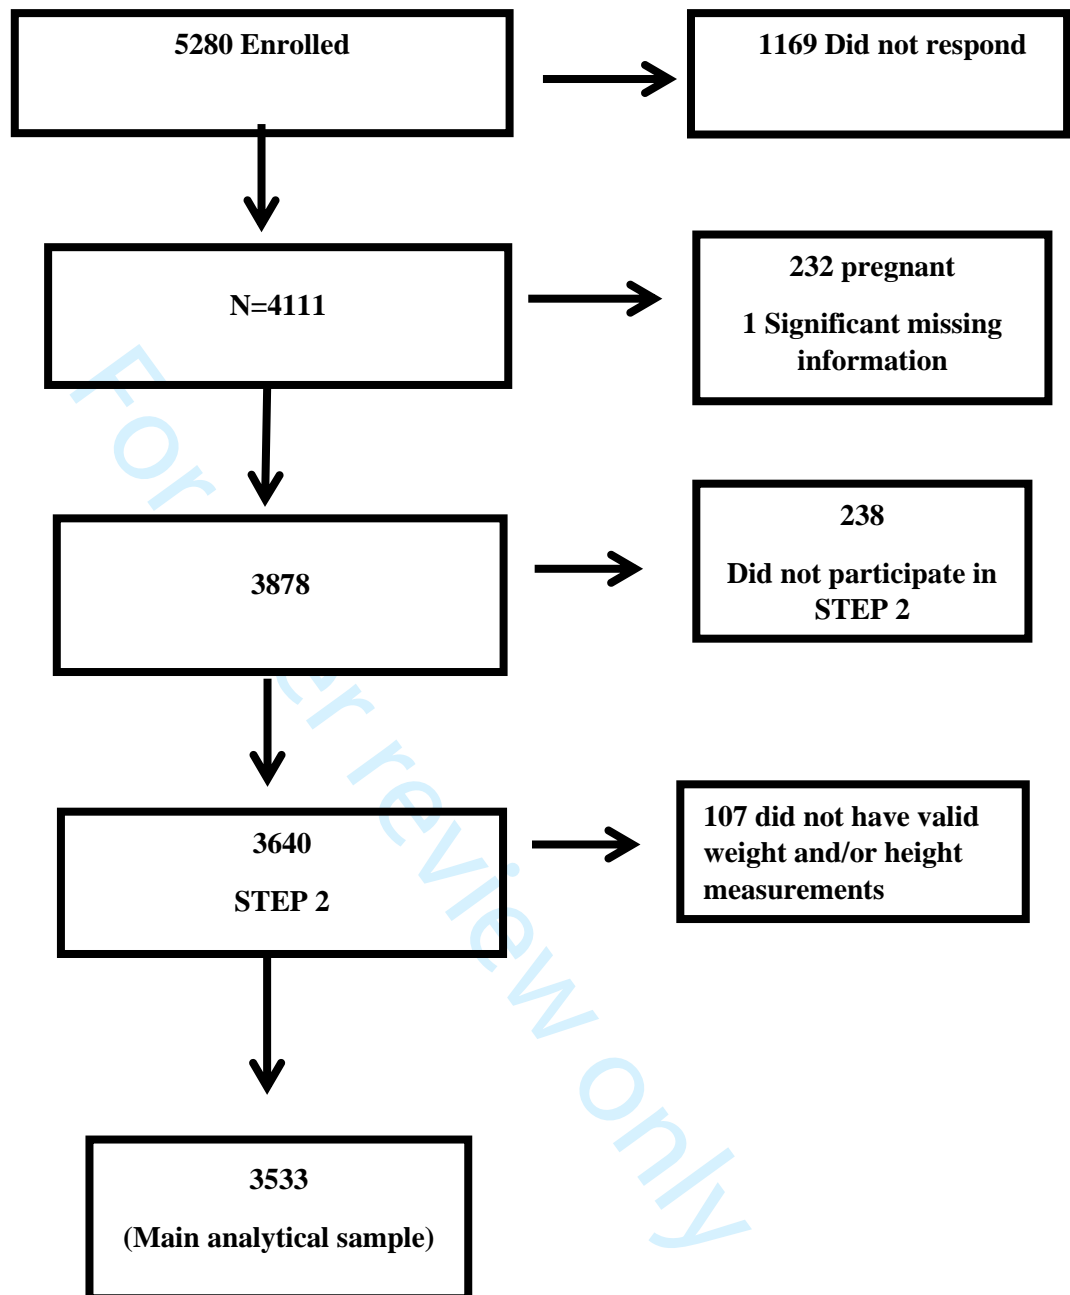



**Supplementary Table 1: Characteristics of study participants by selected demographic, behavioural and biological risk factors**

| Variable                                              | Men<br>%(95% CI)<br>1611 | Women<br>%(95% CI)<br>1922 | Total<br>%(95% CI)<br>3533 |
|-------------------------------------------------------|--------------------------|----------------------------|----------------------------|
| <b>Gender</b>                                         |                          |                            |                            |
| Men                                                   |                          |                            | 50.2(47.6-52.9)            |
| Women                                                 |                          |                            | 49.8(47.1-52.4)            |
| <b>Age Group</b>                                      |                          |                            |                            |
| 25 -34                                                | 46.8(42.8-50.8)          | 45.9(42.8-49.1)            | 46.3(43.9-48.8)            |
| 35-44                                                 | 26.5(24.0-29.2)          | 27.0(24.3-29.8)            | 26.7(24.9-28.7)            |
| 45-54                                                 | 16.8(14.7-19.2)          | 17.6(15.7-19.6)            | 17.2(15.8-18.7)            |
| 55-64                                                 | 9.9(8.2-11.9)            | 9.6(7.5-12.1)              | 9.7(8.2-11.5)              |
|                                                       | P<0.937                  |                            |                            |
| <b>Mean age</b>                                       | 37.8(37.0-38.6)          | 37.6(36.8-38.3)            | 37.7(37.1-38.2)            |
| <b>Marital Status</b>                                 |                          |                            |                            |
| Never married                                         | 22.6(20.1-25.2)          | 7.3(5.7-9.4)               | 15.0(13.4-16.7)            |
| Married                                               | 66.4(59.8-72.3)          | 70.8(63.2-77.4)            | 68.6(61.9-74.6)            |
| Separated/divorced                                    | 2.3(1.7-3.3)             | 4.8(3.8-6.0)               | 3.5(2.9-4.4)               |
| Widowed                                               | 0.3(0.1-0.9)             | 5.5(4.2-7.3)               | 2.9(2.2-3.8)               |
| Cohabiting                                            | 8.4(4.3-15.9)            | 11.6(5.9-21.5)             | 10.0(5.2-18.5)             |
|                                                       | P<0.001                  |                            |                            |
| <b>Ethnicity</b>                                      |                          |                            |                            |
| Mandinka                                              | 42.1(36.9-47.6)          | 39.3(33.4-45.6)            | 40.7(35.6-46.0)            |
| Wolof                                                 | 16.2(12.1-21.4)          | 16.1(12.4-20.5)            | 16.2(12.5-20.7)            |
| Fula                                                  | 20.7(17.1-25.0)          | 18.5(15.1-22.4)            | 19.6(16.4-23.3)            |
| Jola                                                  | 12.2(8.2-17.8)           | 15.1(11.1-20.2)            | 13.6(9.8-18.6)             |
| Other                                                 | 8.7(6.6-11.5)            | 11.1(8.5-14.4)             | 9.9(7.8-12.5)              |
|                                                       | P=0.104                  |                            |                            |
| <b>Years spent in school</b>                          |                          |                            |                            |
| ≤6 Years                                              | 55.0(50.5-59.5)          | 74.3(69.4-78.6)            | 64.3(60.1-68.2)            |
| 7-12 Years                                            | 31.5(28.1-35.2)          | 22.4(18.7-26.6)            | 27.1(24.2-30.3)            |
| >12 Years                                             | 13.4(11.2-16.0)          | 3.4(2.3-4.9)               | 8.6(7.2-10.2)              |
|                                                       | P<0.001                  |                            |                            |
| <b>Residence (Local government area) <sup>a</sup></b> |                          |                            |                            |
| Banjul                                                | 7.8(2.5-21.9)            | 7.1(2.2-21.0)              | 7.5(2.4-20.7)              |
| KMC                                                   | 23.2(15.1-33.9)          | 28.2(18.9-39.8)            | 25.7(17.2-36.6)            |
| WCR                                                   | 35.7(24.3-48.8)          | 30.9(20.6-45.5)            | 33.3(22.6-46.0)            |
| LRR                                                   | 7.6(3.3-16.8)            | 7.9(3.4-17.6)              | 7.8(3.4-16.9)              |
| NBR                                                   | 8.2(4.4-14.6)            | 10.3(5.6-18.11)            | 9.2(5.1-16.3)              |
| CRRN                                                  | 2.5(0.7-8.9)             | 2.8(0.7-9.9)               | 2.7(0.7-9.4)               |
| CRRS                                                  | 6.1(2.5-14.2)            | 6.4(2.6-14.7)              | 6.3(2.6-14.2)              |
| URR                                                   | 8.9(4.1-18.2)            | 6.4(2.8-14.1)              | 7.7(3.5-16.0)              |
|                                                       | P=0.131                  |                            |                            |
| <b>Residence (Rurality)</b>                           |                          |                            |                            |
| Urban                                                 | 57.7(48.2-66.6)          | 56.8(47.8-65.4)            | 57.2(48.3-65.7)            |
| Semi urban                                            | 8.7(4.3-17.0)            | 6.8(3.1-14.4)              | 7.8(3.7-15.5)              |
| Rural                                                 | 33.6(27.4-40.5)          | 36.4(29.8-43.6)            | 35.0(28.9-41.7)            |
|                                                       | P=0.187                  |                            |                            |
| <b>Physical Activity <sup>b</sup></b>                 |                          |                            |                            |
| ≥600METS/week                                         | 88.9(84.0-92.5)          | 80.2(72.1-86.4)            | 84.6(78.2-89.3)            |
| < 600METS/week                                        | 11.1(7.5-16.1)           | 19.8(13.6-27.9)            | 15.4(10.7-21.8)            |
|                                                       | P<0.001                  |                            |                            |
| <b>Smoking</b>                                        |                          |                            |                            |
| Never smokers                                         | 57.3(52.3-62.1)          | 98.1(96.9-98.8)            | 77.6(74.2-80.6)            |

| Variable                                 | Men<br>%(95% CI)<br>1611 | Women<br>%(95% CI)<br>1922 | Total<br>%(95% CI)<br>3533 |
|------------------------------------------|--------------------------|----------------------------|----------------------------|
| Current smokers                          | 33.0(29.0-37.2)          | 1.2(0.7-1.8)               | 17.2(14.8-19.8)            |
| Ex-smokers                               | 9.8(7.7-12.4)            | 0.8(0.3-1.7)               | 5.3(4.1-6.9)               |
| <b>P&lt;0.001</b>                        |                          |                            |                            |
| <b>Servings of fruits and vegetables</b> |                          |                            |                            |
| ≥5 /day                                  | 24.0(18.2-30.9)          | 23.8(18.1-30.6)            | 23.9(18.4-30.4)            |
| < 5/day                                  | 76.0(69.1-81.9)          | 76.2(69.4-81.9)            | 76.1(69.6-81.6)            |
| P= 0.934                                 |                          |                            |                            |
| <b>BMI<sup>c</sup></b>                   |                          |                            |                            |
| Underweight                              | 56.2(50.8-61.4)          | 46.6(42.8-50.5)            | 51.4(47.6-55.2)            |
| Normal                                   | 9.7(7.6-12.4)            | 7.6(6.19.5)-               | 8.7(7.2-10.4)              |
| Overweight                               | 26.0(21.1-31.6)          | 28.8(25.8-31.9)            | 27.4(24.0-31.1)            |
| Obese                                    | 8.1(6.0-11.0)            | 17.0(14.7-19.7)            | 12.6(10.5-14.9)            |
| <b>P&lt;0.001</b>                        |                          |                            |                            |
| <b>Mean height (cm)</b>                  | 166.9(165.1-168.7)       | 160.5(159.5-161.5)         | 163.7(162.4-165.0)         |
| <b>Mean weight (kg)</b>                  | 65.2(64.1-66.3)          | 65.5(63.8-67.3)            | 65.4(64.2-66.5)            |
| <b>Mean BMI(kg/m<sup>2</sup>)</b>        | 23.6(23.1-24.1)          | 25.6(24.9-26.3)            | 24.6(24.1-25.1)            |
| <b>Waist circumference<sup>d</sup></b>   |                          |                            |                            |
| Normal                                   | 89.7(86.7-92.2)          | 54.2(47.4-60.7)            | 72.3(67.8-76.3)            |
| High                                     | 10.3(7.8-13.4)           | 45.9(39.3-52.6)            | 27.7(23.7-32.2)            |
| <b>Mean waist circumference</b>          | 72.1(65.1-75.0)          | 76.0(72.9-79.1)            | 74.0(71.1-76.9)            |
| <b>Waist-to-Hip Ratio<sup>e</sup></b>    |                          |                            |                            |
| Normal                                   | 83.2(79.4-86.4)          | 60.6(54.8-66.1)            | 72.1(68.1-75.8)            |
| High                                     | 16.8(13.6-20.6)          | 39.4(33.9-45.2)            | 27.9(24.2-31.9)            |
| <b>P&lt;0.001</b>                        |                          |                            |                            |
| <b>Waist-Height Ratio</b>                |                          |                            |                            |
| Normal (≤0.5)                            | 81.9(77.9-85.4)          | 59.9(53.2-66.3)            | 71.1(66.2-75.6)            |
| High (>0.5)                              | 18.1(14.6-22.1)          | 40.1(33.7-46.8)            | 28.9(24.4-33.8)            |
| <b>P&lt;0.001</b>                        |                          |                            |                            |
| <b>Mean Hip Circumference (cm)</b>       | 89.3(87.0-91.6)          | 94.2(92.1-96.3)            | 91.7(89.7-93.8)            |

Note: Data shown have been weighted for non-response and the analysis took into account the complex survey design.

<sup>a</sup> KM=Kanifing Municipality; WCR =West Coast Region; LRR= Lower River Region; NBR =North Bank Region; CRRN = Central River Region North, CRRS=Central River Region South; URR =Upper River Region

<sup>b</sup> METS =Metabolic equivalents

<sup>c</sup> BMI is categorised into underweight (BMI<18.5kg/m<sup>2</sup>), normal (18.5-24.9 Kg/m<sup>2</sup>), overweight (25.0-29.9kg/m<sup>2</sup>) and obese (BMI ≥30kg/m<sup>2</sup>).

<sup>d</sup> Based on the definition of the International Diabetes Federation (High waist circumference, indicating abdominal obesity defined as ≥90 cm in men or ≥80 cm in women)

<sup>e</sup> Based on the WHO definitions (high WHR defined as >0.90 in men and >85 in women)

NB: The p value indicates the statistical significance of the difference in proportions between men and women obtained using Pearson's chi-squared test

Supplementary Table 2: Prevalence of BMI categories by selected socio-demographic, behavioural and biological factors in men <sup>a, b, c</sup>

| Variable                            | Normal (desirable)<br>%(95% CI) | Underweight<br>%(95% CI) | Overweight<br>%(95% CI) | Obese<br>%(95% CI) | $\chi^2$<br>P value |
|-------------------------------------|---------------------------------|--------------------------|-------------------------|--------------------|---------------------|
| <b>Total</b>                        | 56.2(50.8-61.4)                 | 9.7(7.6-12.4)            | 26.0(21.1-31.6)         | 8.1(6.0-11.0)      |                     |
| <b>Age Group</b>                    |                                 |                          |                         |                    |                     |
| 25 -34                              | 59.0(52.2-65.6)                 | 11.6(8.4-15.9)           | 22.0(16.3-29.0)         | 7.3(4.9-10.7)      | <b>0.003</b>        |
| 35-44                               | 54.0(47.3-60.6)                 | 7.3(4.9-10.8)            | 32.4(25.7-39.8)         | 6.4(4.1-9.7)       |                     |
| 45-54                               | 48.7(40.5-56.9)                 | 9.3(5.7-14.8)            | 29.6(23.4-36.7)         | 12.4(8.8-17.3)     |                     |
| 55-64                               | 61.0(53.4-68.1)                 | 8.0(5.1-12.3)            | 21.8(16.0-29.0)         | 9.1(4.6-17.4)      |                     |
| <b>Marital status</b>               |                                 |                          |                         |                    |                     |
| Never married                       | 55.1(45.1-64.7)                 | 11.9(7.4-18.4)           | 24.3(16.0-35.2)         | 8.7(4.8-15.2)      | 0.222               |
| Married                             | 56.1(50.7-61.4)                 | 7.9(6.0-10.4)            | 27.7(23.1-32.9)         | 8.2(5.8-11.6)      |                     |
| Separated                           | 49.6(34.1-65.2)                 | 14.6(5.7-32.4)           | 32.1(19.4-48.0)         | 3.8(0.8-15.6)      |                     |
| Widowed                             | 63.3(17.6-93.3)                 | 36.8(6.7-82.4)           | 0.0                     | 0.0                |                     |
| Cohabiting                          | 60.4(48.7-71.0)                 | 16.3(8.6-29.0)           | 16.2(9.6-25.8)          | 7.1(3.5-13.9)      |                     |
| <b>Ethnicity</b>                    |                                 |                          |                         |                    |                     |
| Mandinka                            | 56.8(50.5-62.8)                 | 11.5(8.6-15.1)           | 25.5(19.1-33.1)         | 6.3(4.1-9.6)       | <b>0.042</b>        |
| Wolof                               | 46.8(38.0-55.8)                 | 10.8(6.2-17.9)           | 32.3(24.4-41.4)         | 10.2(6.2-16.4)     |                     |
| Fula                                | 59.1(50.8-66.9)                 | 8.4(5.3-13.1)            | 25.2(18.3-33.5)         | 7.3(4.2-12.2)      |                     |
| Jola                                | 62.6(52.8-71.4)                 | 8.2(4.7-14.1)            | 22.1(15.3-30.8)         | 7.1(3.5-13.9)      |                     |
| Others                              | 55.0(45.2-64.4)                 | 4.8(2.3-9.9)             | 23.8(16.0-33.7)         | 16.5(9.8-26.4)     |                     |
| <b>Residence (LGA) <sup>d</sup></b> |                                 |                          |                         |                    |                     |
| Banjul & KM                         | 33.4(25.4-42.8)                 | 3.2(1.7-6.0)             | 47.2(37.6-57.0)         | 16.2(11.0- 23.1)   | < <b>0.001</b>      |
| WCR                                 | 68.5(63.5-73.2)                 | 15.3(11.7-19.7)          | 11.9(9.0-15.4)          | 4.4(2.9-6.6)       |                     |
| URR                                 | 49.6(38.9-60.3)                 | 4.2(2.0-8.6)             | 32.4(26.1-39.3)         | 13.8(8.9-20.9)     |                     |
| NBR                                 | 65.6(54.9-74.9)                 | 13.9(9.1-20.6)           | 19.1(13.0-27.1)         | 1.5(1.6-3.4)       |                     |
| CRR                                 | 67.1(54.1-77.9)                 | 15.5(9.6-23.9)           | 15.6(10.1-23.4)         | 1.9(0.7-4.4)       |                     |
| LRR                                 | 75.9(62.0-85.9)                 | 5.7(3.0-10.7)            | 17.9(8.5-34.0)          | 0.5(0.1-3.1)       |                     |
| <b>Residence (Rurality)</b>         |                                 |                          |                         |                    |                     |
| Urban                               | 49.1(41.2-57.1)                 | 9.2(6.2-13.5)            | 30.9(23.2-39.9)         | 10.7(7.4-15.4)     | <b>0.001</b>        |
| Semi urban                          | 54.1(40.1-67.5)                 | 8.4(3.3-19.5)            | 27.7(17.6-40.8)         | 9.8(4.7-19.1)      |                     |
| Rural                               | 68.8(62.6-74.3)                 | 10.9(8.1-14.6)           | 17.1(13.0-22.2)         | 3.2(1.8-5.6)       |                     |
| <b>Education level</b>              |                                 |                          |                         |                    |                     |
| No formal education                 | 59.4(54.4-64.1)                 | 9.3(7.1-12.0)            | 24.9(20.5-29.8)         | 6.5(4.6-9.3)       | <b>0.007</b>        |

| Variable                               | Normal (desirable)<br>%(95% CI) | Underweight<br>%(95% CI) | Overweight<br>%(95% CI) | Obese<br>%(95% CI) | $\chi^2$<br>P value |
|----------------------------------------|---------------------------------|--------------------------|-------------------------|--------------------|---------------------|
| Primary/ Middle                        | 61.3(51.9-69.9)                 | 13.4(8.3-21.0)           | 19.4(13.4-27.4)         | 5.9(3.0-11.2)      |                     |
| Secondary/Tertiary                     | 47.7(38.6-56.9)                 | 8.0(4.6-13.7)            | 32.1(23.6-42.1)         | 12.1(8.2-17.7)     |                     |
| <b>Years spent in school</b>           |                                 |                          |                         |                    |                     |
| ≤6 Years                               | 60.5(55.7-65.1)                 | 9.4(7.3-12.1)            | 23.7(19.6-28.3)         | 6.4(4.6-8.9)       | <b>0.003</b>        |
| 7-12 Years                             | 49.7(41.7-57.8)                 | 13.3(8.6-19.9)           | 27.9(20.1-37.2)         | 9.1(5.8-14.1)      |                     |
| >12 Years                              | 48.5(35.4-61.7)                 | 4.3(2.2-8.5)             | 34.3(24.8-45.3)         | 12.9(7.1-22.4)     |                     |
| <b>Smoking</b>                         |                                 |                          |                         |                    |                     |
| Never smokers                          | 53.1(46.8-59.3)                 | 7.0(5.1-9.7)             | 30.1(24.3-36.7)         | 9.8(6.8-13.8)      | <b>&lt;0.001</b>    |
| Current smokers                        | 61.6(54.8-68.1)                 | 13.8(11.0-17.3)          | 18.8(13.5-25.4)         | 5.8(3.9-8.7)       |                     |
| Ex-smokers                             | 55.5(46.8-63.9)                 | 11.8(6.7-20.0)           | 26.4(18.3-36.6)         | 6.3(3.2-12.1)      |                     |
| <b>Servings of fruits and vegs</b>     |                                 |                          |                         |                    |                     |
| ≥ 5/day                                | 61.8(54.1-68.8)                 | 9.1(6.5-12.7)            | 23.3(17.7-29.9)         | 5.8(3.5-9.6)       | 0.321               |
| < 5/day                                | 54.1(47.2-60.8)                 | 10.5(7.6-14.3)           | 27.8(21.5-35.1)         | 7.8(5.1-10.1)      |                     |
| <b>Physical Activity<sup>e</sup></b>   |                                 |                          |                         |                    |                     |
| <600METS/week                          | 46.5(36.3-57.0)                 | 4.7(2.3-9.4)             | 31.3(22.7-41.4)         | 17.5(11.5-25.7)    | <b>&lt;0.001</b>    |
| ≥600METS/week                          | 56.8(51.0-62.3)                 | 10.5(8.1-13.5)           | 25.7(20.2-32.0)         | 7.1(5.2-9.7)       |                     |
| <b>Waist circumference<sup>f</sup></b> |                                 |                          |                         |                    |                     |
| Normal                                 | 57.4(51.3-63.2)                 | 10.9(8.4-14.1)           | 24.2(18.6-30.7)         | 7.6(5.3-10.7)      | <b>&lt;0.001</b>    |
| High                                   | 43.2(34.4-52.4)                 | 1.5(0.5-4.7)             | 41.5(33.2-50.3)         | 13.8(8.8-21.6)     |                     |

Note: Data shown have been weighted for non-response and the analysis took into account the complex survey design.

<sup>a</sup> BMI is categorised into underweight (BMI<18.5kg/m<sup>2</sup>), normal (18.5-24.9 kg/m<sup>2</sup>), overweight (25.0-29.9kg/m<sup>2</sup>) and obese (BMI ≥30kg/m<sup>2</sup>).

<sup>b</sup> Results adjusted for complex survey design and weighted for non-response

<sup>c</sup> Row percentages are presented, i.e the prevalence of being in that BMI category for people with that socio-demographic and behavioural or biological characteristic

N= unweighted sample/observations

<sup>d</sup> KM= Kanifing Municipality; WCR =West Coast Region; URR =Upper River Region.; NBR =North Bank Region ; CRRS=Central River Region South ; CRRN = Central River Region North ; LRR= Lower River Region. Regions ordered from most to least urban

<sup>e</sup> METS =Metabolic equivalents

<sup>f</sup> Based on the definition of the International Diabetes Federation (High waist circumference, indicating abdominal obesity defined as ≥90 cm in men or ≥80 cm in women)

Supplementary Table 3: Prevalence of BMI categories by selected socio-demographic, behavioural and biological factors in women <sup>a, b, c</sup>

| Variable                            | Normal (desirable)<br>%(95% CI) | Underweight<br>%(95% CI) | Overweight<br>%(95% CI) | Obese<br>%(95% CI) | $\chi^2$<br>P value |
|-------------------------------------|---------------------------------|--------------------------|-------------------------|--------------------|---------------------|
| Total                               | 46.6(42.8-50.5)                 | 7.6(6.1-9.5)             | 28.8(25.8-31.9)         | 17.0(14.7-19.7)    |                     |
| <b>Age Group</b>                    |                                 |                          |                         |                    |                     |
| 25 -34                              | 51.6(46.9-56.2)                 | 8.3(6.3-10.9)            | 27.4(23.7-31.5)         | 12.8(10.0-16.2)    | <b>0.001</b>        |
| 35-44                               | 46.1(39.5-52.9)                 | 6.3(4.4-8.9)             | 28.5(22.9-34.8)         | 19.1(14.9-24.2)    |                     |
| 45-54                               | 43.3(35.9-51.0)                 | 6.4(3.8-10.5)            | 32.6(26.5-39.2)         | 17.7(12.5-24.4)    |                     |
| 55-64                               | 30.3(22.6-39.2)                 | 10.1(5.5-17.9)           | 29.3(20.3-40.4)         | 30.3(20.9-41.7)    |                     |
| <b>Marital status</b>               |                                 |                          |                         |                    |                     |
| Never married                       | 46.8(36.0-57.9)                 | 6.3(3.1-12.7)            | 36.2(26.4-47.2)         | 10.7(6.3-17.4)     | <b>0.001</b>        |
| Married                             | 46.6(42.3-51.0)                 | 6.9(5.2-9.1)             | 27.9(24.7-31.3)         | 18.6(15.8-21.8)    |                     |
| Separated                           | 32.5(22.5-44.4)                 | 9.6(4.5-19.2)            | 40.8(29.6-53.1)         | 17.1(9.3-29.5)     |                     |
| Widowed                             | 37.1(26.6-48.9)                 | 6.0(2.6-13.4)            | 30.4(21.0-41.8)         | 26.5(16.1-40.5)    |                     |
| Cohabiting                          | 57.6(46.8-67.6)                 | 12.5(7.9-19.2)           | 22.7(16.1-31.1)         | 7.3(4.8-10.7)      |                     |
| <b>Ethnicity</b>                    |                                 |                          |                         |                    |                     |
| Mandinka                            | 51.1(46.0-56.2)                 | 9.0(6.7-11.9)            | 26.4(22.6-30.7)         | 13.5(10.7-16.8)    | 0.066               |
| Wollof                              | 42.4(33.1-52.4)                 | 4.8(2.7-8.2)             | 29.3(22.7-36.9)         | 23.5(17.8-30.4)    |                     |
| Fula                                | 44.6(37.8-51.6)                 | 7.7(5.2-11.3)            | 31.7(26.5-37.4)         | 16.0(12.2-20.6)    |                     |
| Jola                                | 45.1(37.0-53.4)                 | 8.9(5.1-15.0)            | 26.4(20.0-33.9)         | 19.7(13.4-28.0)    |                     |
| Others                              | 42.5(32.4-53.3)                 | 4.8(2.8-8.1)             | 34.4(26.8-42.8)         | 18.3(12.5-26.1)    |                     |
| <b>Residence (LGA) <sup>d</sup></b> |                                 |                          |                         |                    |                     |
| Banjul & KM                         | 32.6(27.2-38.4)                 | 2.3(1.1-4.6)             | 38.8(33.1-44.8)         | 26.3(22.1-31.1)    | <b>&lt;0.001</b>    |
| WCR                                 | 49.8(42.8-56.7)                 | 11.4(8.1-15.7)           | 25.4(20.3-31.2)         | 13.5(10.0-18.1)    |                     |
| URR                                 | 53.9(45.9-61.6)                 | 9.5(4.7-18.2)            | 22.7(15.1-32.7)         | 13.9(8.5-21.8)     |                     |
| NBR                                 | 53.8(46.8-60.6)                 | 13.4(8.2-20.9)           | 20.9(16.0-26.8)         | 12.0(9.5-15.2)     |                     |
| CRR                                 | 67.3(51.3-80.1)                 | 7.5(5.0-11.0)            | 17.7(10.6-27.9)         | 7.6(3.1-17.1)      |                     |
| LRR                                 | 57.9(44.8-70.0)                 | 7.4(2.9-20.9)            | 25.6(17.1-36.3)         | 9.1(4.4-17.9)      |                     |
| <b>Residence (Rurality)</b>         |                                 |                          |                         |                    |                     |
| Urban                               | 38.0(33.1-43.2)                 | 5.1(3.3-7.7)             | 34.2(29.7-39.0)         | 22.7(19.3-26.6)    | <b>&lt;0.001</b>    |
| Semi urban                          | 43.5(37.5-49.7)                 | 4.2(2.8-6.3)             | 35.2(30.0-40.8)         | 17.1(13.8-21.1)    |                     |
| Rural                               | 60.6(54.9-66.1)                 | 12.1(9.3-15.6)           | 19.1(15.6-23.2)         | 8.1(6.1-10.6)      |                     |
| <b>Education level</b>              |                                 |                          |                         |                    |                     |
| No formal education                 | 49.5(45.3-53.7)                 | 7.6(5.9-9.9)             | 27.4(24.1-31.0)         | 15.6(12.9-18.4)    | <b>0.002</b>        |
| Primary/ Middle                     | 46.7(39.9-53.6)                 | 8.2(5.4-12.4)            | 27.2(21.6-33.7)         | 17.9(13.2-23.9)    |                     |

| Variable                               | Normal (desirable)<br>%(95% CI) | Underweight<br>%(95% CI) | Overweight<br>%(95% CI) | Obese<br>%(95% CI) | $\chi^2$<br>P value |
|----------------------------------------|---------------------------------|--------------------------|-------------------------|--------------------|---------------------|
| Secondary/Tertiary                     | 32.0(25.0-39.8)                 | 6.3(4.0-9.5)             | 37.9(30.8-45.5)         | 23.9(17.7-31.6)    |                     |
| <b>Years spent in school</b>           |                                 |                          |                         |                    |                     |
| ≤6 Years                               | 49.2(45.2-53.2)                 | 8.0(6.3-10.1)            | 26.9(23.8-30.3)         | 15.9(13.5-18.6)    | <b>0.012</b>        |
| 7-12 Years                             | 38.5(31.0-46.7)                 | 5.6(3.3-9.3)             | 35.5(28.8-43.0)         | 20.4(15.1-26.9)    |                     |
| >12 Years                              | 31.0(18.9-46.5)                 | 7.5(3.0-17.8)            | 41.5(26.7-57.9)         | 20.0(9.1-38.3)     |                     |
| <b>Servings of fruits and vegs</b>     |                                 |                          |                         |                    |                     |
| ≥ 5/day                                | 45.1(39.8-50.6)                 | 9.5(6.0-14.7)            | 27.9(22.7-33.8)         | 17.5(12.9-23.2)    | 0.621               |
| < 5/day                                | 46.2(41.3-51.3)                 | 7.0(5.2-9.4)             | 29.6(26.1-33.4)         | 17.2(14.5-20.3)    |                     |
| <b>Physical activity</b>               |                                 |                          |                         |                    |                     |
| <600METS/week                          | 39.0(32.6-45.8)                 | 5.7(3.2-9.9)             | 31.6(23.8-40.5)         | 23.7(18.4-30.1)    | <b>0.022</b>        |
| ≥600METS/week                          | 48.3(43.5-53.0)                 | 8.0(6.3-10.4)            | 28.0(24.9-31.3)         | 15.7(13.1-18.6)    |                     |
| <b>Waist circumference<sup>e</sup></b> |                                 |                          |                         |                    |                     |
| Normal                                 | 51.8(46.1-57.5)                 | 10.3(7.7-13.8)           | 24.5(20.1-29.3)         | 13.4(9.6-18.4)     | <b>&lt;0.001</b>    |
| High                                   | 39.7(34.2-45.4)                 | 4.7(3.1-7.1)             | 34.3(29.9-39.1)         | 21.3(17.8-25.2)    |                     |

Note: Data shown have been weighted for non-response and the analysis took into account the complex survey design.

<sup>a</sup> BMI is categorised into underweight (BMI<18.5Kg/m<sup>2</sup>), normal (18.5-24.9 Kg/m<sup>2</sup>), overweight (25.0-29.9Kg/m<sup>2</sup>) and obese (BMI ≥30Kg/m<sup>2</sup>).

<sup>b</sup> Results adjusted for complex survey design and weighted for non-response

<sup>c</sup> Row percentages are presented, i.e the prevalence of being in that BMI category for people with that socio-demographic, behavioural or biological characteristic

N= unweighted sample/observations

<sup>d</sup> KM= <sup>a</sup> KM=Kanifing Municipality; WCR =West Coast Region; URR =Upper River Region.; NBR =North Bank Region ; CRRS=Central River Region South ; CRRN = Central River Region North ; LRR= Lower River Region. Regions ordered from most to least urban

<sup>e</sup> METS =Metabolic equivalents

<sup>f</sup> Based on the definition of the International Diabetes Federation (High waist circumference, indicating abdominal obesity defined as ≥90 cm in men or ≥80 cm in women)

STROBE Statement—Checklist of items that should be included in reports of *cross-sectional studies*

|                           | Item No | Recommendation                                                                                                                                                                       | This manuscript                                                          |
|---------------------------|---------|--------------------------------------------------------------------------------------------------------------------------------------------------------------------------------------|--------------------------------------------------------------------------|
| <b>Title and abstract</b> | 1       | (a) Indicate the study's design with a commonly used term in the title or the abstract                                                                                               | The term 'cross-sectional surveys' survey' in the title and the abstract |
|                           |         | (b) Provide in the abstract an informative and balanced summary of what was done and what was found                                                                                  | Yes                                                                      |
| <b>Introduction</b>       |         |                                                                                                                                                                                      |                                                                          |
| Background/rationale      | 2       | Explain the scientific background and rationale for the investigation being reported                                                                                                 | Yes                                                                      |
| Objectives                | 3       | State specific objectives, including any prespecified hypotheses                                                                                                                     | Yes                                                                      |
| <b>Methods</b>            |         |                                                                                                                                                                                      |                                                                          |
| Study design              | 4       | Present key elements of study design early in the paper                                                                                                                              | Yes (In the title and abstract)                                          |
| Setting                   | 5       | Describe the setting, locations, and relevant dates, including periods of recruitment, exposure, follow-up, and data collection                                                      | Yes (In the abstract and methods)                                        |
| Participants              | 6       | (a) Give the eligibility criteria, and the sources and methods of selection of participants                                                                                          | Yes (In the abstract and methods)                                        |
| Variables                 | 7       | Clearly define all outcomes, exposures, predictors, potential confounders, and effect modifiers. Give diagnostic criteria, if applicable                                             | Yes (In the abstract and methods)                                        |
| Data sources/measurement  | 8*      | For each variable of interest, give sources of data and details of methods of assessment (measurement). Describe comparability of assessment methods if there is more than one group | Yes (In the methods)                                                     |
| Bias                      | 9       | Describe any efforts to address potential sources of bias                                                                                                                            | Yes                                                                      |
| Study size                | 10      | Explain how the study size was arrived at                                                                                                                                            | Yes                                                                      |
| Quantitative variables    | 11      | Explain how quantitative variables were handled in the analyses. If applicable, describe which groupings were chosen and why                                                         | Yes                                                                      |
| Statistical methods       | 12      | (a) Describe all statistical methods, including those used to control for confounding                                                                                                | Yes                                                                      |
|                           |         | (b) Describe any methods used to examine subgroups and interactions                                                                                                                  | Yes                                                                      |
|                           |         | (c) Explain how missing data were addressed                                                                                                                                          | Yes                                                                      |



1  
2  
3  
4  
5  
6  
7  
8  
9  
10  
11  
12  
13  
14  
15  
16  
17  
18  
19  
20  
21  
22  
23  
24  
25  
26  
27  
28  
29  
30  
31  
32  
33  
34  
35  
36  
37  
38  
39  
40  
41  
42  
43  
44  
45  
46  
47  
48  
49  
50  
51  
52  
53  
54  
55  
56  
57  
58  
59  
60

(d) If applicable, describe analytical methods taking account of sampling strategy Yes

(e) Describe any sensitivity analyses We conducted a number of regression analyses adjusting for different variables.

## Results

|                   |     |                                                                                                                                                                                                              |                     |
|-------------------|-----|--------------------------------------------------------------------------------------------------------------------------------------------------------------------------------------------------------------|---------------------|
| Participants      | 13* | (a) Report numbers of individuals at each stage of study—eg numbers potentially eligible, examined for eligibility, confirmed eligible, included in the study, completing follow-up, and analysed            | Yes (See Figure 1)  |
|                   |     | (b) Give reasons for non-participation at each stage                                                                                                                                                         | Yes                 |
|                   |     | (c) Consider use of a flow diagram                                                                                                                                                                           | Yes (Figure 1)      |
| Descriptive data  | 14* | (a) Give characteristics of study participants (eg demographic, clinical, social) and information on exposures and potential confounders                                                                     | Yes (Table S1)      |
|                   |     | (b) Indicate number of participants with missing data for each variable of interest                                                                                                                          | Not done            |
| Outcome data      | 15* | Report numbers of outcome events or summary measures                                                                                                                                                         | N/A                 |
| Main results      | 16  | (a) Give unadjusted estimates and, if applicable, confounder-adjusted estimates and their precision (eg, 95% confidence interval). Make clear which confounders were adjusted for and why they were included | Yes                 |
|                   |     | (b) Report category boundaries when continuous variables were categorized                                                                                                                                    | NA                  |
|                   |     | (c) If relevant, consider translating estimates of relative risk into absolute risk for a meaningful time period                                                                                             | N/A                 |
| Other analyses    | 17  | Report other analyses done—eg analyses of subgroups and interactions, and sensitivity analyses                                                                                                               | Yes                 |
| <b>Discussion</b> |     |                                                                                                                                                                                                              |                     |
| Key results       | 18  | Summarise key results with reference to study objectives                                                                                                                                                     | Yes                 |
| Limitations       | 19  | Discuss limitations of the study, taking into account sources of potential bias or imprecision. Discuss both direction and magnitude of any potential bias                                                   | Yes (Lines 411-435) |
| Interpretation    | 20  | Give a cautious overall interpretation of results considering objectives, limitations,                                                                                                                       | Yes                 |



1  
2  
3  
4  
5  
6  
7  
8  
9  
10  
11  
12  
13  
14  
15  
16  
17  
18  
19  
20  
21  
22  
23  
24  
25  
26  
27  
28  
29  
30  
31  
32  
33  
34  
35  
36  
37  
38  
39  
40  
41  
42  
43  
44  
45  
46  
47  
48  
49  
50  
51  
52  
53  
54  
55  
56  
57  
58  
59  
60

multiplicity of analyses, results from similar studies, and other relevant evidence

|                          |    |                                                                                                                                                               |     |
|--------------------------|----|---------------------------------------------------------------------------------------------------------------------------------------------------------------|-----|
| Generalisability         | 21 | Discuss the generalisability (external validity) of the study results                                                                                         | Yes |
| <b>Other information</b> |    |                                                                                                                                                               |     |
| Funding                  | 22 | Give the source of funding and the role of the funders for the present study and, if applicable, for the original study on which the present article is based | Yes |

\*Give information separately for exposed and unexposed groups.

**Note:** An Explanation and Elaboration article discusses each checklist item and gives methodological background and published examples of transparent reporting. The STROBE checklist is best used in conjunction with this article (freely available on the Web sites of PLoS Medicine at <http://www.plosmedicine.org/>, Annals of Internal Medicine at <http://www.annals.org/>, and Epidemiology at <http://www.epidem.com/>). Information on the STROBE Initiative is available at [www.strobe-statement.org](http://www.strobe-statement.org).
