# Supplementary material for: The silent epidemic of obesity in The Gambia: evidence from a nationwide, population-based, cross-sectional health examination survey
Source: PubMed Central journal article supplement — BMJ Open. 2020 Jun 1;10(6):e033882. doi: 10.1136/bmjopen-2019-033882 (PMC7265034; doi:10.1136/bmjopen-2019-033882), 2020-06-01
Supplement: bmjopen-2019-033882supp001.pdf [file bmjopen-2019-033882supp001.pdf]

**Supplementary Table 1: Characteristics of study participants by selected demographic, behavioural and biological risk factors**

| Variable                                              | Men<br>% (95% CI)<br>1611 | Women<br>% (95% CI)<br>1922 | Total<br>% (95% CI)<br>3533 |
|-------------------------------------------------------|---------------------------|-----------------------------|-----------------------------|
| <b>Gender</b>                                         |                           |                             |                             |
| Men                                                   |                           |                             | 50.2(47.6-52.9)             |
| Women                                                 |                           |                             | 49.8(47.1-52.4)             |
| <b>Age Group</b>                                      |                           |                             |                             |
| 25 -34                                                | 46.8(42.8-50.8)           | 45.9(42.8-49.1)             | 46.3(43.9-48.8)             |
| 35-44                                                 | 26.5(24.0-29.2)           | 27.0(24.3-29.8)             | 26.7(24.9-28.7)             |
| 45-54                                                 | 16.8(14.7-19.2)           | 17.6(15.7-19.6)             | 17.2(15.8-18.7)             |
| 55-64                                                 | 9.9(8.2-11.9)             | 9.6(7.5-12.1)               | 9.7(8.2-11.5)               |
|                                                       | P<0.937                   |                             |                             |
| <b>Mean age</b>                                       | 37.8(37.0-38.6)           | 37.6(36.8-38.3)             | 37.7(37.1-38.2)             |
| <b>Marital Status</b>                                 |                           |                             |                             |
| Never married                                         | 22.6(20.1-25.2)           | 7.3(5.7-9.4)                | 15.0(13.4-16.7)             |
| Married                                               | 66.4(59.8-72.3)           | 70.8(63.2-77.4)             | 68.6(61.9-74.6)             |
| Separated/divorced                                    | 2.3(1.7-3.3)              | 4.8(3.8-6.0)                | 3.5(2.9-4.4)                |
| Widowed                                               | 0.3(0.1-0.9)              | 5.5(4.2-7.3)                | 2.9(2.2-3.8)                |
| Cohabiting                                            | 8.4(4.3-15.9)             | 11.6(5.9-21.5)              | 10.0(5.2-18.5)              |
|                                                       | P<0.001                   |                             |                             |
| <b>Ethnicity</b>                                      |                           |                             |                             |
| Mandinka                                              | 42.1(36.9-47.6)           | 39.3(33.4-45.6)             | 40.7(35.6-46.0)             |
| Wollof                                                | 16.2(12.1-21.4)           | 16.1(12.4-20.5)             | 16.2(12.5-20.7)             |
| Fula                                                  | 20.7(17.1-25.0)           | 18.5(15.1-22.4)             | 19.6(16.4-23.3)             |
| Jola                                                  | 12.2(8.2-17.8)            | 15.1(11.1-20.2)             | 13.6(9.8-18.6)              |
| Other                                                 | 8.7(6.6-11.5)             | 11.1(8.5-14.4)              | 9.9(7.8-12.5)               |
|                                                       | P=0.104                   |                             |                             |
| <b>Years spent in school</b>                          |                           |                             |                             |
| ≤6 Years                                              | 55.0(50.5-59.5)           | 74.3(69.4-78.6)             | 64.3(60.1-68.2)             |
| 7-12 Years                                            | 31.5(28.1-35.2)           | 22.4(18.7-26.6)             | 27.1(24.2-30.3)             |
| >12 Years                                             | 13.4(11.2-16.0)           | 3.4(2.3-4.9)                | 8.6(7.2-10.2)               |
|                                                       | P<0.001                   |                             |                             |
| <b>Residence (Local government area) <sup>a</sup></b> |                           |                             |                             |
| Banjul                                                | 7.8(2.5-21.9)             | 7.1(2.2-21.0)               | 7.5(2.4-20.7)               |
| KMC                                                   | 23.2(15.1-33.9)           | 28.2(18.9-39.8)             | 25.7(17.2-36.6)             |
| WCR                                                   | 35.7(24.3-48.8)           | 30.9(20.6-45.5)             | 33.3(22.6-46.0)             |
| LRR                                                   | 7.6(3.3-16.8)             | 7.9(3.4-17.6)               | 7.8(3.4-16.9)               |
| NBR                                                   | 8.2(4.4-14.6)             | 10.3(5.6-18.11)             | 9.2(5.1-16.3)               |
| CRRN                                                  | 2.5(0.7-8.9)              | 2.8(0.7-9.9)                | 2.7(0.7-9.4)                |
| CRRS                                                  | 6.1(2.5-14.2)             | 6.4(2.6-14.7)               | 6.3(2.6-14.2)               |
| URR                                                   | 8.9(4.1-18.2)             | 6.4(2.8-14.1)               | 7.7(3.5-16.0)               |
|                                                       | P=0.131                   |                             |                             |
| <b>Residence (Rurality)</b>                           |                           |                             |                             |
| Urban                                                 | 57.7(48.2-66.6)           | 56.8(47.8-65.4)             | 57.2(48.3-65.7)             |
| Semi urban                                            | 8.7(4.3-17.0)             | 6.8(3.1-14.4)               | 7.8(3.7-15.5)               |
| Rural                                                 | 33.6(27.4-40.5)           | 36.4(29.8-43.6)             | 35.0(28.9-41.7)             |
|                                                       | P=0.187                   |                             |                             |
| <b>Physical Activity <sup>b</sup></b>                 |                           |                             |                             |
| ≥600METS/week                                         | 88.9(84.0-92.5)           | 80.2(72.1-86.4)             | 84.6(78.2-89.3)             |
| < 600METS/week                                        | 11.1(7.5-16.1)            | 19.8(13.6-27.9)             | 15.4(10.7-21.8)             |
|                                                       | P<0.001                   |                             |                             |
| <b>Smoking</b>                                        |                           |                             |                             |
| Never smokers                                         | 57.3(52.3-62.1)           | 98.1(96.9-98.8)             | 77.6(74.2-80.6)             |

| Variable                                 | Men<br>% (95% CI)<br>1611 | Women<br>% (95% CI)<br>1922 | Total<br>% (95% CI)<br>3533 |
|------------------------------------------|---------------------------|-----------------------------|-----------------------------|
| Current smokers                          | 33.0(29.0-37.2)           | 1.2(0.7-1.8)                | 17.2(14.8-19.8)             |
| Ex-smokers                               | 9.8(7.7-12.4)             | 0.8(0.3-1.7)                | 5.3(4.1-6.9)                |
|                                          | <b>P&lt;0.001</b>         |                             |                             |
| <b>Servings of fruits and vegetables</b> |                           |                             |                             |
| ≥5 /day                                  | 24.0(18.2-30.9)           | 23.8(18.1-30.6)             | 23.9(18.4-30.4)             |
| < 5/day                                  | 76.0(69.1-81.9)           | 76.2(69.4-81.9)             | 76.1(69.6-81.6)             |
|                                          | P= 0.934                  |                             |                             |
| <b>BMI<sup>c</sup></b>                   |                           |                             |                             |
| Underweight                              | 56.2(50.8-61.4)           | 46.6(42.8-50.5)             | 51.4(47.6-55.2)             |
| Normal                                   | 9.7(7.6-12.4)             | 7.6(6.19-5)-                | 8.7(7.2-10.4)               |
| Overweight                               | 26.0(21.1-31.6)           | 28.8(25.8-31.9)             | 27.4(24.0-31.1)             |
| Obese                                    | 8.1(6.0-11.0)             | 17.0(14.7-19.7)             | 12.6(10.5-14.9)             |
|                                          | <b>P&lt;0.001</b>         |                             |                             |
| <b>Mean height (cm)</b>                  | 166.9(165.1-168.7)        | 160.5(159.5-161.5)          | 163.7(162.4-165.0)          |
| <b>Mean weight (kg)</b>                  | 65.2(64.1-66.3)           | 65.5(63.8-67.3)             | 65.4(64.2-66.5)             |
| <b>Mean BMI(kg/m<sup>2</sup>)</b>        | 23.6(23.1-24.1)           | 25.6(24.9-26.3)             | 24.6(24.1-25.1)             |
| <b>Waist circumference<sup>d</sup></b>   |                           |                             |                             |
| Normal                                   | 89.7(86.7-92.2)           | 54.2(47.4-60.7)             | 72.3(67.8-76.3)             |
| High                                     | 10.3(7.8-13.4)            | 45.9(39.3-52.6)             | 27.7(23.7-32.2)             |
| <b>Mean waist circumference</b>          | 72.1(65.1-75.0)           | 76.0(72.9-79.1)             | 74.0(71.1-76.9)             |
| <b>Waist-to-Hip Ratio<sup>e</sup></b>    |                           |                             |                             |
| Normal                                   | 83.2(79.4-86.4)           | 60.6(54.8-66.1)             | 72.1(68.1-75.8)             |
| High                                     | 16.8(13.6-20.6)           | 39.4(33.9-45.2)             | 27.9(24.2-31.9)             |
|                                          | <b>P&lt;0.001</b>         |                             |                             |
| <b>Waist-Height Ratio</b>                |                           |                             |                             |
| Normal (≤0.5)                            | 81.9(77.9-85.4)           | 59.9(53.2-66.3)             | 71.1(66.2-75.6)             |
| High (>0.5)                              | 18.1(14.6-22.1)           | 40.1(33.7-46.8)             | 28.9(24.4-33.8)             |
|                                          | <b>P&lt;0.001</b>         |                             |                             |
| <b>Mean Hip Circumference (cm)</b>       | 89.3(87.0-91.6)           | 94.2(92.1-96.3)             | 91.7(89.7-93.8)             |

Note: Data shown have been weighted for non-response and the analysis took into account the complex survey design.

<sup>a</sup> KM=Kanifing Municipality; WCR =West Coast Region; LRR= Lower River Region; NBR =North Bank Region; CRRN = Central River Region North, CRRS=Central River Region South; URR =Upper River Region

<sup>b</sup> METS =Metabolic equivalents

<sup>c</sup> BMI is categorised into underweight (BMI<18.5kg/m<sup>2</sup>), normal (18.5-24.9 Kg/m<sup>2</sup>), overweight (25.0-29.9kg/m<sup>2</sup>) and obese (BMI ≥30kg/m<sup>2</sup>).

<sup>d</sup> Based on the definition of the International Diabetes Federation (High waist circumference, indicating abdominal obesity defined as ≥90 cm in men or ≥80 cm in women)

<sup>e</sup> Based on the WHO definitions (high WHR defined as >0.90 in men and >85 in women)

NB: The p value indicates the statistical significance of the difference in proportions between men and women obtained using Pearson's chi-squared test

Supplementary Table 2: Prevalence of BMI categories by selected socio-demographic, behavioural and biological factors in men <sup>a, b, c</sup>

| Variable                            | Normal (desirable)<br>% (95% CI) | Underweight<br>% (95% CI) | Overweight<br>% (95% CI) | Obese<br>% (95% CI) | $\chi^2$<br>P value |
|-------------------------------------|----------------------------------|---------------------------|--------------------------|---------------------|---------------------|
| <b>Total</b>                        | 56.2(50.8-61.4)                  | 9.7(7.6-12.4)             | 26.0(21.1-31.6)          | 8.1(6.0-11.0)       |                     |
| <b>Age Group</b>                    |                                  |                           |                          |                     |                     |
| 25 -34                              | 59.0(52.2-65.6)                  | 11.6(8.4-15.9)            | 22.0(16.3-29.0)          | 7.3(4.9-10.7)       | <b>0.003</b>        |
| 35-44                               | 54.0(47.3-60.6)                  | 7.3(4.9-10.8)             | 32.4(25.7-39.8)          | 6.4(4.1-9.7)        |                     |
| 45-54                               | 48.7(40.5-56.9)                  | 9.3(5.7-14.8)             | 29.6(23.4-36.7)          | 12.4(8.8-17.3)      |                     |
| 55-64                               | 61.0(53.4-68.1)                  | 8.0(5.1-12.3)             | 21.8(16.0-29.0)          | 9.1(4.6-17.4)       |                     |
| <b>Marital status</b>               |                                  |                           |                          |                     |                     |
| Never married                       | 55.1(45.1-64.7)                  | 11.9(7.4-18.4)            | 24.3(16.0-35.2)          | 8.7(4.8-15.2)       | 0.222               |
| Married                             | 56.1(50.7-61.4)                  | 7.9(6.0-10.4)             | 27.7(23.1-32.9)          | 8.2(5.8-11.6)       |                     |
| Separated                           | 49.6(34.1-65.2)                  | 14.6(5.7-32.4)            | 32.1(19.4-48.0)          | 3.8(0.8-15.6)       |                     |
| Widowed                             | 63.3(17.6-93.3)                  | 36.8(6.7-82.4)            | 0.0                      | 0.0                 |                     |
| Cohabiting                          | 60.4(48.7-71.0)                  | 16.3(8.6-29.0)            | 16.2(9.6-25.8)           | 7.1(3.5-13.9)       |                     |
| <b>Ethnicity</b>                    |                                  |                           |                          |                     |                     |
| Mandinka                            | 56.8(50.5-62.8)                  | 11.5(8.6-15.1)            | 25.5(19.1-33.1)          | 6.3(4.1-9.6)        | <b>0.042</b>        |
| Wolof                               | 46.8(38.0-55.8)                  | 10.8(6.2-17.9)            | 32.3(24.4-41.4)          | 10.2(6.2-16.4)      |                     |
| Fula                                | 59.1(50.8-66.9)                  | 8.4(5.3-13.1)             | 25.2(18.3-33.5)          | 7.3(4.2-12.2)       |                     |
| Jola                                | 62.6(52.8-71.4)                  | 8.2(4.7-14.1)             | 22.1(15.3-30.8)          | 7.1(3.5-13.9)       |                     |
| Others                              | 55.0(45.2-64.4)                  | 4.8(2.3-9.9)              | 23.8(16.0-33.7)          | 16.5(9.8-26.4)      |                     |
| <b>Residence (LGA) <sup>d</sup></b> |                                  |                           |                          |                     |                     |
| Banjul & KM                         | 33.4(25.4-42.8)                  | 3.2(1.7-6.0)              | 47.2(37.6-57.0)          | 16.2(11.0- 23.1)    | <b>&lt;0.001</b>    |
| WCR                                 | 68.5(63.5-73.2)                  | 15.3(11.7-19.7)           | 11.9(9.0-15.4)           | 4.4(2.9-6.6)        |                     |
| URR                                 | 49.6(38.9-60.3)                  | 4.2(2.0-8.6)              | 32.4(26.1-39.3)          | 13.8(8.9-20.9)      |                     |
| NBR                                 | 65.6(54.9-74.9)                  | 13.9(9.1-20.6)            | 19.1(13.0-27.1)          | 1.5(1.6-3.4)        |                     |
| CRR                                 | 67.1(54.1-77.9)                  | 15.5(9.6-23.9)            | 15.6(10.1-23.4)          | 1.9(0.7-4.4)        |                     |
| LRR                                 | 75.9(62.0-85.9)                  | 5.7(3.0-10.7)             | 17.9(8.5-34.0)           | 0.5(0.1-3.1)        |                     |
| <b>Residence (Rurality)</b>         |                                  |                           |                          |                     |                     |
| Urban                               | 49.1(41.2-57.1)                  | 9.2(6.2-13.5)             | 30.9(23.2-39.9)          | 10.7(7.4-15.4)      | <b>0.001</b>        |
| Semi urban                          | 54.1(40.1-67.5)                  | 8.4(3.3-19.5)             | 27.7(17.6-40.8)          | 9.8(4.7-19.1)       |                     |
| Rural                               | 68.8(62.6-74.3)                  | 10.9(8.1-14.6)            | 17.1(13.0-22.2)          | 3.2(1.8-5.6)        |                     |
| <b>Education level</b>              |                                  |                           |                          |                     |                     |
| No formal education                 | 59.4(54.4-64.1)                  | 9.3(7.1-12.0)             | 24.9(20.5-29.8)          | 6.5(4.6-9.3)        | <b>0.007</b>        |

| Variable                               | Normal (desirable)<br>%(95% CI) | Underweight<br>%(95% CI) | Overweight<br>%(95% CI) | Obese<br>%(95% CI) | $\chi^2$<br>P value |
|----------------------------------------|---------------------------------|--------------------------|-------------------------|--------------------|---------------------|
| Primary/ Middle                        | 61.3(51.9-69.9)                 | 13.4(8.3-21.0)           | 19.4(13.4-27.4)         | 5.9(3.0-11.2)      |                     |
| Secondary/Tertiary                     | 47.7(38.6-56.9)                 | 8.0(4.6-13.7)            | 32.1(23.6-42.1)         | 12.1(8.2-17.7)     |                     |
| <b>Years spent in school</b>           |                                 |                          |                         |                    |                     |
| ≤6 Years                               | 60.5(55.7-65.1)                 | 9.4(7.3-12.1)            | 23.7(19.6-28.3)         | 6.4(4.6-8.9)       | <b>0.003</b>        |
| 7-12 Years                             | 49.7(41.7-57.8)                 | 13.3(8.6-19.9)           | 27.9(20.1-37.2)         | 9.1(5.8-14.1)      |                     |
| > 12 Years                             | 48.5(35.4-61.7)                 | 4.3(2.2-8.5)             | 34.3(24.8-45.3)         | 12.9(7.1-22.4)     |                     |
| <b>Smoking</b>                         |                                 |                          |                         |                    |                     |
| Never smokers                          | 53.1(46.8-59.3)                 | 7.0(5.1-9.7)             | 30.1(24.3-36.7)         | 9.8(6.8-13.8)      | <b>&lt;0.001</b>    |
| Current smokers                        | 61.6(54.8-68.1)                 | 13.8(11.0-17.3)          | 18.8(13.5-25.4)         | 5.8(3.9-8.7)       |                     |
| Ex-smokers                             | 55.5(46.8-63.9)                 | 11.8(6.7-20.0)           | 26.4(18.3-36.6)         | 6.3(3.2-12.1)      |                     |
| <b>Servings of fruits and vegs</b>     |                                 |                          |                         |                    |                     |
| ≥ 5/day                                | 61.8(54.1-68.8)                 | 9.1(6.5-12.7)            | 23.3(17.7-29.9)         | 5.8(3.5-9.6)       | 0.321               |
| < 5/day                                | 54.1(47.2-60.8)                 | 10.5(7.6-14.3)           | 27.8(21.5-35.1)         | 7.8(5.1-10.1)      |                     |
| <b>Physical Activity<sup>e</sup></b>   |                                 |                          |                         |                    |                     |
| <600METS/week                          | 46.5(36.3-57.0)                 | 4.7(2.3-9.4)             | 31.3(22.7-41.4)         | 17.5(11.5-25.7)    | <b>&lt;0.001</b>    |
| ≥600METS/week                          | 56.8(51.0-62.3)                 | 10.5(8.1-13.5)           | 25.7(20.2-32.0)         | 7.1(5.2-9.7)       |                     |
| <b>Waist circumference<sup>f</sup></b> |                                 |                          |                         |                    |                     |
| Normal                                 | 57.4(51.3-63.2)                 | 10.9(8.4-14.1)           | 24.2(18.6-30.7)         | 7.6(5.3-10.7)      | <b>&lt;0.001</b>    |
| High                                   | 43.2(34.4-52.4)                 | 1.5(0.5-4.7)             | 41.5(33.2-50.3)         | 13.8(8.8-21.6)     |                     |

Note: Data shown have been weighted for non-response and the analysis took into account the complex survey design.

<sup>a</sup> BMI is categorised into underweight (BMI<18.5kg/m<sup>2</sup>), normal (18.5-24.9 kg/m<sup>2</sup>), overweight (25.0-29.9kg/m<sup>2</sup>) and obese (BMI ≥30kg/m<sup>2</sup>).

<sup>b</sup> Results adjusted for complex survey design and weighted for non-response

<sup>c</sup> Row percentages are presented, i.e the prevalence of being in that BMI category for people with that socio-demographic and behavioural or biological characteristic

N= unweighted sample/observations

<sup>d</sup> KM= Kanifing Municipality; WCR =West Coast Region; URR =Upper River Region.; NBR =North Bank Region ; CRRS=Central River Region South ; CRRN = Central River Region North ; LRR= Lower River Region. Regions ordered from most to least urban

<sup>e</sup> METS =Metabolic equivalents

<sup>f</sup> Based on the definition of the International Diabetes Federation (High waist circumference, indicating abdominal obesity defined as ≥90 cm in men or ≥80 cm in women)

Supplementary Table 3: Prevalence of BMI categories by selected socio-demographic, behavioural and biological factors in women <sup>a, b, c</sup>

| Variable                            | Normal (desirable)<br>%(95% CI) | Underweight<br>%(95% CI) | Overweight<br>%(95% CI) | Obese<br>%(95% CI) | $\chi^2$<br>P value |
|-------------------------------------|---------------------------------|--------------------------|-------------------------|--------------------|---------------------|
| Total                               | 46.6(42.8-50.5)                 | 7.6(6.1-9.5)             | 28.8(25.8-31.9)         | 17.0(14.7-19.7)    |                     |
| <b>Age Group</b>                    |                                 |                          |                         |                    |                     |
| 25 -34                              | 51.6(46.9-56.2)                 | 8.3(6.3-10.9)            | 27.4(23.7-31.5)         | 12.8(10.0-16.2)    | <b>0.001</b>        |
| 35-44                               | 46.1(39.5-52.9)                 | 6.3(4.4-8.9)             | 28.5(22.9-34.8)         | 19.1(14.9-24.2)    |                     |
| 45-54                               | 43.3(35.9-51.0)                 | 6.4(3.8-10.5)            | 32.6(26.5-39.2)         | 17.7(12.5-24.4)    |                     |
| 55-64                               | 30.3(22.6-39.2)                 | 10.1(5.5-17.9)           | 29.3(20.3-40.4)         | 30.3(20.9-41.7)    |                     |
| <b>Marital status</b>               |                                 |                          |                         |                    |                     |
| Never married                       | 46.8(36.0-57.9)                 | 6.3(3.1-12.7)            | 36.2(26.4-47.2)         | 10.7(6.3-17.4)     | <b>0.001</b>        |
| Married                             | 46.6(42.3-51.0)                 | 6.9(5.2-9.1)             | 27.9(24.7-31.3)         | 18.6(15.8-21.8)    |                     |
| Separated                           | 32.5(22.5-44.4)                 | 9.6(4.5-19.2)            | 40.8(29.6-53.1)         | 17.1(9.3-29.5)     |                     |
| Widowed                             | 37.1(26.6-48.9)                 | 6.0(2.6-13.4)            | 30.4(21.0-41.8)         | 26.5(16.1-40.5)    |                     |
| Cohabiting                          | 57.6(46.8-67.6)                 | 12.5(7.9-19.2)           | 22.7(16.1-31.1)         | 7.3(4.8-10.7)      |                     |
| <b>Ethnicity</b>                    |                                 |                          |                         |                    |                     |
| Mandinka                            | 51.1(46.0-56.2)                 | 9.0(6.7-11.9)            | 26.4(22.6-30.7)         | 13.5(10.7-16.8)    | 0.066               |
| Wolof                               | 42.4(33.1-52.4)                 | 4.8(2.7-8.2)             | 29.3(22.7-36.9)         | 23.5(17.8-30.4)    |                     |
| Fula                                | 44.6(37.8-51.6)                 | 7.7(5.2-11.3)            | 31.7(26.5-37.4)         | 16.0(12.2-20.6)    |                     |
| Jola                                | 45.1(37.0-53.4)                 | 8.9(5.1-15.0)            | 26.4(20.0-33.9)         | 19.7(13.4-28.0)    |                     |
| Others                              | 42.5(32.4-53.3)                 | 4.8(2.8-8.1)             | 34.4(26.8-42.8)         | 18.3(12.5-26.1)    |                     |
| <b>Residence (LGA) <sup>d</sup></b> |                                 |                          |                         |                    |                     |
| Banjul & KM                         | 32.6(27.2-38.4)                 | 2.3(1.1-4.6)             | 38.8(33.1-44.8)         | 26.3(22.1-31.1)    | <b>&lt;0.001</b>    |
| WCR                                 | 49.8(42.8-56.7)                 | 11.4(8.1-15.7)           | 25.4(20.3-31.2)         | 13.5(10.0-18.1)    |                     |
| URR                                 | 53.9(45.9-61.6)                 | 9.5(4.7-18.2)            | 22.7(15.1-32.7)         | 13.9(8.5-21.8)     |                     |
| NBR                                 | 53.8(46.8-60.6)                 | 13.4(8.2-20.9)           | 20.9(16.0-26.8)         | 12.0(9.5-15.2)     |                     |
| CRR                                 | 67.3(51.3-80.1)                 | 7.5(5.0-11.0)            | 17.7(10.6-27.9)         | 7.6(3.1-17.1)      |                     |
| LRR                                 | 57.9(44.8-70.0)                 | 7.4(2.9-20.9)            | 25.6(17.1-36.3)         | 9.1(4.4-17.9)      |                     |
| <b>Residence (Rurality)</b>         |                                 |                          |                         |                    |                     |
| Urban                               | 38.0(33.1-43.2)                 | 5.1(3.3-7.7)             | 34.2(29.7-39.0)         | 22.7(19.3-26.6)    | <b>&lt;0.001</b>    |
| Semi urban                          | 43.5(37.5-49.7)                 | 4.2(2.8-6.3)             | 35.2(30.0-40.8)         | 17.1(13.8-21.1)    |                     |
| Rural                               | 60.6(54.9-66.1)                 | 12.1(9.3-15.6)           | 19.1(15.6-23.2)         | 8.1(6.1-10.6)      |                     |
| <b>Education level</b>              |                                 |                          |                         |                    |                     |
| No formal education                 | 49.5(45.3-53.7)                 | 7.6(5.9-9.9)             | 27.4(24.1-31.0)         | 15.6(12.9-18.4)    | <b>0.002</b>        |
| Primary/ Middle                     | 46.7(39.9-53.6)                 | 8.2(5.4-12.4)            | 27.2(21.6-33.7)         | 17.9(13.2-23.9)    |                     |

| Variable                               | Normal (desirable)<br>%(95% CI) | Underweight<br>%(95% CI) | Overweight<br>%(95% CI) | Obese<br>%(95% CI) | $\chi^2$<br>P value |
|----------------------------------------|---------------------------------|--------------------------|-------------------------|--------------------|---------------------|
| Secondary/Tertiary                     | 32.0(25.0-39.8)                 | 6.3(4.0-9.5)             | 37.9(30.8-45.5)         | 23.9(17.7-31.6)    |                     |
| <b>Years spent in school</b>           |                                 |                          |                         |                    |                     |
| ≤6 Years                               | 49.2(45.2-53.2)                 | 8.0(6.3-10.1)            | 26.9(23.8-30.3)         | 15.9(13.5-18.6)    | <b>0.012</b>        |
| 7-12 Years                             | 38.5(31.0-46.7)                 | 5.6(3.3-9.3)             | 35.5(28.8-43.0)         | 20.4(15.1-26.9)    |                     |
| >12 Years                              | 31.0(18.9-46.5)                 | 7.5(3.0-17.8)            | 41.5(26.7-57.9)         | 20.0(9.1-38.3)     |                     |
| <b>Servings of fruits and vegs</b>     |                                 |                          |                         |                    |                     |
| ≥ 5/day                                | 45.1(39.8-50.6)                 | 9.5(6.0-14.7)            | 27.9(22.7-33.8)         | 17.5(12.9-23.2)    | 0.621               |
| < 5/day                                | 46.2(41.3-51.3)                 | 7.0(5.2-9.4)             | 29.6(26.1-33.4)         | 17.2(14.5-20.3)    |                     |
| <b>Physical activity</b>               |                                 |                          |                         |                    |                     |
| <600METS/week                          | 39.0(32.6-45.8)                 | 5.7(3.2-9.9)             | 31.6(23.8-40.5)         | 23.7(18.4-30.1)    | <b>0.022</b>        |
| ≥600METS/week                          | 48.3(43.5-53.0)                 | 8.0(6.3-10.4)            | 28.0(24.9-31.3)         | 15.7(13.1-18.6)    |                     |
| <b>Waist circumference<sup>e</sup></b> |                                 |                          |                         |                    |                     |
| Normal                                 | 51.8(46.1-57.5)                 | 10.3(7.7-13.8)           | 24.5(20.1-29.3)         | 13.4(9.6-18.4)     | <b>&lt;0.001</b>    |
| High                                   | 39.7(34.2-45.4)                 | 4.7(3.1-7.1)             | 34.3(29.9-39.1)         | 21.3(17.8-25.2)    |                     |

Note: Data shown have been weighted for non-response and the analysis took into account the complex survey design.

<sup>a</sup> BMI is categorised into underweight (BMI<18.5Kg/m<sup>2</sup>), normal (18.5-24.9 Kg/m<sup>2</sup>), overweight (25.0-29.9Kg/m<sup>2</sup>) and obese (BMI ≥30Kg/m<sup>2</sup>).

<sup>b</sup> Results adjusted for complex survey design and weighted for non-response

<sup>c</sup> Row percentages are presented, i.e the prevalence of being in that BMI category for people with that socio-demographic, behavioural or biological characteristic

N= unweighted sample/observations

<sup>d</sup> KM= <sup>a</sup> KM=Kanifing Municipality; WCR =West Coast Region; URR =Upper River Region.; NBR =North Bank Region ; CRRS=Central River Region South ; CRRN = Central River Region North ; LRR= Lower River Region. Regions ordered from most to least urban

<sup>e</sup> METS =Metabolic equivalents

<sup>f</sup> Based on the definition of the International Diabetes Federation (High waist circumference, indicating abdominal obesity defined as ≥90 cm in men or ≥80 cm in women)
